# Supplementary material for: Transcriptome profiles of high-lysine adaptation reveal insights into osmotic stress response in Corynebacterium glutamicum
Source: Front Bioeng Biotechnol. 2022 Aug 9;10:933325. doi: 10.3389/fbioe.2022.933325 (PMC9395588; doi:10.3389/fbioe.2022.933325)
Supplement: Supplementary file 2 [file DataSheet2.XLSX]

## Sheet: Table S1
Table S1 Primers used for gene disruption and plasmid construction
Primers	Sequence (5’-3’) a	Description
pXMJ19-F-BsaI	TCAGTGAATTCAGGATAGCTTGGCTGTTTTGGCGGATGAGAGAAG	For the amplification of pXMJ19 backbone
pXMJ19-R-BsaI	TCAGTGGATCCAAAGCAATTCTGTTTCCTGTGTGAAATTGTTATCCG
cg0074-F-BsaI	CACTACTGGTCTCAGCTTCTCCTTTTGTTGCCCTGGAACGTTGAT	For the amplification of the cg0074 gene
cg0074-R-BsaI	CACTACTGGTCTCAATCCTTAGTTCTCCTTAGGGCTTGGAAGCTTG
cg1152-F-BsaI	CACTACTGGTCTCAGCTTTCTCAGTTCCATATCCGCCCAAC	For the amplification of the cg1152 gene
cg1152-R-BsaI	CACTACTGGTCTCAATCCTCATGACAAGGATCCGATCGTGTAT
cg0767-F-BsaI	CACTACTGGTCTCAGCTTGCACCACTGGTCATGCCCATGG	For the amplification of the cg0767 gene
cg0767-R-BsaI	CACTACTGGTCTCAATCCTCAGCCCCGCATGGAAACGCC
cg2313-F-BsaI	CACTACTGGTCTCAGCTTACAGGAAACCCCTTGACGGCATC	For the amplification of the cg2313 gene
cg2313-R-BsaI	CACTACTGGTCTCAATCCTTAAACCTCGATGCTTTCAGCAAGGTTGATGGT
cg1424-F-BsaI	CACTACTGGTCTCAGCTTACCATGTTAAGAACCAATCATTTTAC	For the amplification of the cg1424 gene
cg1424-R-BsaI	CACTACTGGTCTCAATCCCTAACCCATCAACATCAGTTTGATGGCCA
cg0470-F-BsaI	CACTACTGGTCTCAGCTTCTACCCTCTTTGGGGTAGGGCTC	For the amplification of the cg0470 gene
cg0470-R-BsaI	CACTACTGGTCTCAATCCTTACTTAAACGCTGCAAGGAAT
cg0785-F-BsaI	CACTACTGGTCTCAGCTTGAATTTGGGCTTGGAGGGAACC	For the amplification of the cg0785 gene
cg0785-R-BsaI	CACTACTGGTCTCAATCCTCATGTCAGGCGCTCCAATGCGT
cg0362-F-BsaI	CACTACTGGTCTCAGCTTGGGAAGTGTCATTTGCCACACTGT	For the amplification of the cg0362 gene
cg0362-R-BsaI	CACTACTGGTCTCAATCCTCATGCCGCCACCTCCCCGAGGACCG
cg2919-F-BsaI	CACTACTGGTCTCAGCTTCTTTAAGAAGGAGATATACATATGTCTGACAAGATCTGGAAAGT	For the amplification of the cg2919gene
cg2919-R-BsaI	CACTACTGGTCTCAATCCCTACCGTGCATTGGCCCATGA
cg1379-F-BsaI	CACTACTGGTCTCAGCTTCTTTAAGAAGGAGATATACATATGACTGCCACATTGTCACTCA	For the amplification of the cg1379 gene
cg1379-R-BsaI	CACTACTGGTCTCAATCCCTAGGCAGGTGTGGTGATTTC
cg3100-F-BsaI	CACTACTGGTCTCAGCTTACTTGGTGTCAAAGTTGAGTGGGAC	For the amplification of the cg3100 gene
cg3100-R-BsaI	CACTACTGGTCTCAATCCTTACTTCTTGTCCTCACCATTG
cg3099-F-BsaI	CACTACTGGTCTCAGCTTCTTTAAGAAGGAGATATACATATGACTACCCCTAACGGAATGCC	For the amplification of the cg3099 gene
cg3099-R-BsaI	CACTACTGGTCTCAATCCCTAGCTCTCCTCTGGATCCCCAATG
cg3098-F-BsaI	CACTACTGGTCTCAGCTTACTAAGTCTCTTAGTGGTTTCCGC	For the amplification of the cg3098 gene
cg3098-R-BsaI	CACTACTGGTCTCAATCCCTAGCGGTTCTGGCCCGCCCAGT
cg0690-F-BsaI	CACTACTGGTCTCAGCTTGCACCCTCAACAGTTGAGTGCTG	For the amplification of the cg0690 gene
cg0690-R-BsaI	CACTACTGGTCTCAATCCCTACTTCTCGACGATTGCGAG
cg3011-F-BsaI	CACTACTGGTCTCAGCTTCTTGCACTCACACCCCTTGAGTG	For the amplification of the cg3011 gene
cg3011-R-BsaI	CACTACTGGTCTCAATCCTTAGAAGCCGCCCATGCCGCCCAT
cg3327-F-BsaI	CACTACTGGTCTCAGCTTACTAAGCGTGGCCTGCGGGAATCG	For the amplification of the cg3327 gene
cg3327-R-BsaI	CACTACTGGTCTCAATCCTTACTCTTGGATGTTTCCGTCTACATC
proP-5F	CAATTTCACACAGGAAACAGAATTAAGCTTCATTCTTCCAGCTCCCAGACTTG	For the amplification of the proP gene
proP-3R	CATCCGCCAAAACAGCCAAGCTGAATTCTTATGCGTTTTGCTTTTCAGCAC
mscCG-5F	CAATTTCACACAGGAAACAGAATTAAGCTTGCGCTTGACGAGACGACTTGGAAG	For the amplification of the mscCG gene
mscCG-3R	CATCCGCCAAAACAGCCAAGCTGAATTCCTAAGGGGTGGACGTCGGCGCAACT
cysIHDN-5F	CAATTTCACACAGGAAACAGAATTAAGCTTCACTCCTAGACCGCTTGGTCTG	For the amplification of the cysIHDN gene
cysIHDN-3R	CATCCGCCAAAACAGCCAAGCTGAATTCCTAGATCGACCAGTTATTGCGTAG
ssuD1CBA-5F	CAATTTCACACAGGAAACAGAATTAAGCTTCCAAAATGCAGCTCACGCAATAGAC	For the amplification of the ssuABCD gene
ssuD1CBA-3R	CATCCGCCAAAACAGCCAAGCTGAATTCTTAGCCCTCAAATCGGGTGTCTAC
mutT-F-KpnI	GTACGGTACCTTTAGCCTAATGTGGACACCATGAAAGGCGACGGC	For the amplification of the mutT gene
mutT-R-XbaI	GTACTCTAGACTACTCTGTTGTGTTCAGTAGCTTTCTTAAAGAGGGCCACGCTTTG
ndh-F-KpnI	GTACGGTACCATCAGGAGACTTTGACAAATATGTCAGT	For the amplification of the ndh gene
ndh-R-XbaI	GTACTCTAGATTACTTTCCGCTGAAACGCTGGTTGTCGC
uvrA-up-F	GAATTCGAGCTCGGTACCCGGGGATCCGCCATCTGCGACGTAGACCGATGCA	For the amplification of the upstream region of uvrA gene
uvrA-up-R	CATCTTCTCCTACAACAAATCAGCCAATGCTCAACTGCCCTTC
uvrA-down-F	GAAGGGCAGTTGAGCATTGGCTGATTTGTTGTAGGAGAAGATG	For the amplification of the downstream region of uvrA gene
uvrA-down-R	TTGCATGCCTGCAGGTCGACTCTAGACATGTTCATTGCAGTCGACTGGCC
mfd-up-F	GAATTCGAGCTCGGTACCCGGGGATCCGCAGCAGGTTAAGGCAGTATCAAAG	For the amplification of the upstream region of mfd gene
mfd-up-R	GAATTACAGGCTCATAGGTGTCACGCTTCACTCTCC
mfd-down-F	GAGTGAAGCGTGACACCTATGAGCCTGTAATTCTTC	For the amplification of the downstream region of mfd gene
mfd-down-R	TTGCATGCCTGCAGGTCGACTCTAGACGGTGGCGTGCAATCCTTTATCC
uvrD-up-F	GAATTCGAGCTCGGTACCCGGGGATCCCTTTTATCTTGCGTCCTATGGACG	For the amplification of the upstream region of uvrD gene
uvrD-up-R	CGCCGTGATTGGGGCTATAGCTTATTCATTACCCCAATAACCTAC
uvrD-down-F	GTAGGTTATTGGGGTAATGAATAAGCTATAGCCCCAATCACGGCG	For the amplification of the downstream region of uvrD gene
uvrD-down-R	TTGCATGCCTGCAGGTCGACTCTAGACACTCCATTCCTGCGATTGGTGCG
mutM1-up-F	GAATTCGAGCTCGGTACCCGGGGATCCTGCAGCAGATGACGAAGATGAG	For the amplification of the upstream region of mutM1 gene
mutM1-up-R	CTAGCGCCGCTTCTGGCAGTTATCTTCTAAACCGCGGCGCAC
mutM1-down-F	GTGCGCCGCGGTTTAGAAGATAACTGCCAGAAGCGGCGCTAG	For the amplification of the downstream region of mutM1 gene
mutM1-down-R	TTGCATGCCTGCAGGTCGACTCTAGATGTTCAAGCTGCTCTCGCGTGAATC
tagA2-up-F	GAATTCGAGCTCGGTACCCGGGGATCCCAATGATGGCTGGCGCTTTGATC	For the amplification of the upstream region of tagA2 gene
tagA2-up-R	CTTCAGCTCTGTGACGCGAACCATAATTTGAGCAT
tagA2-down-F	ATGCTCAAATTATGGTTCGCGTCACAGAGCTGAAG	For the amplification of the downstream region of tagA2 gene
tagA2-down-R	TTGCATGCCTGCAGGTCGACTCTAGATCGTCGGCTGCGTCACCAGTAGAC
nth-up-F	GAATTCGAGCTCGGTACCCGGGGATCCCGACGAGCCAGAACGCGCAGGAG	For the amplification of the upstream region of nth gene
nth-up-R	GTCATTTGTTTTCTACATTCCTGCGGAACCCATACCCTTAAG
nth-down-F	CTTAAGGGTATGGGTTCCGCAGGAATGTAGAAAACAAATGAC	For the amplification of the downstream region of nth gene
nth-down-R	TTGCATGCCTGCAGGTCGACTCTAGAGAAGGCGCAGTCCACGGCGTTAG
nei-up-F	GAATTCGAGCTCGGTACCCGGGGATCCGTGCGGGAGGCGCCTTCCTGTTTTCTG	For the amplification of the upstream region of nei gene
nei-up-R	GTCTCATGCTTCACGAGTTTAGACCTTCTGGCATGTCATCAGG
nei-down-F	CCTGATGACATGCCAGAAGGTCTAAACTCGTGAAGCATGAGAC	For the amplification of the downstream region of nei gene
nei-down-R	TTGCATGCCTGCAGGTCGACTCTAGATTCCGCTCGCGGGTTTCACCACC
mutT-1-For	GAATTCGAGCTCGGTACCCGGGGATCCGCGTCCATTCGAATACTCCCACCCG	For the amplification of the upstream region of mutT gene
mutT-2-Rev	GAATGGGCTCATTAAGCAAGTTTCTTCACGATTCTCCTCAG
mutT-3-For	CTGAGGAGAATCGTGAAGAAACTTGCTTAATGAGCCCATTC	For the amplification of the downstream region of mutT gene
mutT-4-Rev	TTGCATGCCTGCAGGTCGACTCTAGACCTTTGTCAGCGTTTGGATGGTGCC
recJ-1-For	GAATTCGAGCTCGGTACCCGGGGATCCGATTAACTCCGACACCTACGAACAG	For the amplification of the upstream region of recJ gene
recJ-2-Rev	CTTATGCAACCAAGCTAGATAACGGTAACGGTCATAGAAAAATC
recJ-3-For	GATTTTTCTATGACCGTTACCGTTATCTAGCTTGGTTGCATAAG	For the amplification of the downstream region of recJ gene
recJ-4-Rev	TTGCATGCCTGCAGGTCGACTCTAGATAGGAGAACTACCTTTCTTGCTGGT
recF-up-F	GAATTCGAGCTCGGTACCCGGGGATCCCAGGTACCGGTTCCATCAACGC	For the amplification of the upstream region of recF gene
recF-up-R	CTCAATTGGATCTGTCATGGTTGGATGTGCATCGGGTCTG
recF-down-F	CAGACCCGATGCACATCCAACCATGACAGATCCAATTGAG	For the amplification of the downstream region of recF gene
recF-down-R	TTGCATGCCTGCAGGTCGACTCTAGAGACCGTCATCGACAACTTGAAC
recG-up-F	GAATTCGAGCTCGGTACCCGGGGATCCCCTGAGATCAAAAACGCCCTCAAAG	For the amplification of the upstream region of recG gene
recG-up-R	GTTGGTGGGTCAAGCCTTTGGTTCCACGGTGGCG
recG-down-F	CGCCACCGTGGAACCAAAGGCTTGACCCACCAAC	For the amplification of the downstream region of recG gene
recG-down-R	TTGCATGCCTGCAGGTCGACTCTAGAAGCTCAGTTGGTAGAGCACCTG
cg1318-up-F	GAATTCGAGCTCGGTACCCGGGGATCCCTGATGAGTTACCGCGAAAAGGAGGGT	For the amplification of the upstream region of cg1318 gene
cg1318-up-R	GTCTTAGACCTCCCGCACGGTGGACATGG
cg1318-down-F	GAAACCATGTCCACCGTGCGGGAGGTCTAAGAC	For the amplification of the downstream region of cg1318 gene
cg1318-down-R	TTGCATGCCTGCAGGTCGACTCTAGAGCCCTGCTTCAGCCTTTTCGACTTCT
cg2228-up-F	GAATTCGAGCTCGGTACCCGGGGATCCCGTAGCCGCCCTAGGCACCCAACC	For the amplification of the upstream region of cg2228 gene
cg2228-up-R	GGATATAGTTCTACCGAGCGCCTTGTGTTTTCATCTGTCCCC
cg2228-down-F	GGGGACAGATGAAAACACAAGGCGCTCGGTAGAACTATATCC	For the amplification of the downstream region of cg2228 gene
cg2228-down-R	TTGCATGCCTGCAGGTCGACTCTAGACTGATGATGCGGATCGAGCCGTATTC
recB-up-F	GAATTCGAGCTCGGTACCCGGGGATCCTCCGGCGTCGCTCATCTTCATCTGCAC	For the amplification of the upstream region of recB gene
recB-up-R	CACGACTAGGCTAGTCTGCTGTGCTGGTCATAATGATCAC
recB-down-F	CGTTAAAGTAGGTGATCATTATGACCAGCACAGCAGACTAGCCTAG	For the amplification of the downstream region of recB gene
recB-down-R	TTGCATGCCTGCAGGTCGACTCTAGAGGCGCACTCACCGGTTTGGGCTATG
ndh-1-For	GAATTCGAGCTCGGTACCCGGGGATCCACGGCCACAGGCTCCGAGATC	For the amplification of the upstream region of ndh gene
ndh-2-Rev	CGCTGAAACGCTGGTTGTCGCGGGTTGGGTTAACTGACATATTTG
ndh-3-For	CAAATATGTCAGTTAACCCAACCCGCGACAACCAGCGTTTCAGCG	For the amplification of the downstream region of ndh gene
ndh-4-Rev	TTGCATGCCTGCAGGTCGACTCTAGAATCTGAGTCAACCGTGGCGCCTAG
a Restriction sites are underlined.

## Sheet: Table S2
Table S2 The overlap DEGs in the lysine-treated ST and HL samples
gene_id	locus_tag	Gene	gene_start	gene_end	gene_length	gene_description	STvsWT_log2FoldChange	STvsWT_padj	HLvsWT_log2FoldChange	HLvsWT_padj
CGTRNA_RS00005	cg0001	dnaA	1	1575	1575	sp|Q8NUD8|DNAA_CORGL Chromosomal replication initiator protein DnaA OS=Corynebacterium glutamicum (strain ATCC 13032 / DSM 20300 / JCM 1318 / LMG 3730 / NCIMB 10025) GN=dnaA PE=3 SV=1//0 && PF08299:Bacterial dnaA protein helix-turn-helix|PF00308:Bacterial dnaA protein	1.07523	1.7801e-05	0.60526	0.0397757
CGTRNA_RS00015	cg0005	recF	3585	4769	1185	sp|Q6M8X7|RECF_CORGL DNA replication and repair protein RecF OS=Corynebacterium glutamicum (strain ATCC 13032 / DSM 20300 / JCM 1318 / LMG 3730 / NCIMB 10025) GN=recF PE=3 SV=1//0 && PF02463:RecF/RecN/SMC N terminal domain	0.747301	0.0102697	0.645707	0.0438333
CGTRNA_RS00020	cg0008	cg0008	4766	5302	537	sp|Q8NUD4|Y005_CORGL UPF0232 protein Cgl0005/cg0006 OS=Corynebacterium glutamicum (strain ATCC 13032 / DSM 20300 / JCM 1318 / LMG 3730 / NCIMB 10025) GN=Cgl0005 PE=3 SV=1//8.73597e-130 && PF05258:Protein of unknown function (DUF721)	0.802652	0.0337223	1.21956	0.00170313
CGTRNA_RS00030	cg0009	cg0009	7830	8798	969	-//- && PF12146:Serine aminopeptidase, S33	2.129	3.33647e-15	1.73728	3.12543e-08
CGTRNA_RS00035	cg0010	cg0010	8795	9376	582	-//- && -	-0.799618	0.0153057	-0.822122	0.0277168
CGTRNA_RS00040	cg0012	cg0012	9471	9914	444	-//- && -	-0.709177	0.00109782	-2.32355	4.54522e-17
CGTRNA_RS00045	cg0012	cg0012	10104	11171	1068	sp|P64706|Y495_MYCBO Uncharacterized protein Mb0495 OS=Mycobacterium bovis (strain ATCC BAA-935 / AF2122/97) GN=Mb0495 PE=4 SV=1//1.63119e-17 && -	1.2018	0.00105318	0.987472	0.0139356
CGTRNA_RS00065	cg0016	cg0016	14405	14749	345	sp|P9WMA7|Y007_MYCTU Uncharacterized protein Rv0007 OS=Mycobacterium tuberculosis (strain ATCC 25618 / H37Rv) GN=Rv0007 PE=1 SV=1//9.46549e-08 && PF12089:Transmembrane domain of unknown function (DUF3566)	-0.541814	0.0173494	1.05254	1.06453e-05
CGTRNA_RS00095	cg0025	cg0025	17857	18729	873	-//- && PF02683:Cytochrome C biogenesis protein transmembrane region	3.01092	2.07995e-12	1.59321	0.00948608
CGTRNA_RS00110	cg0029	cg0029	20073	21068	996	-//- && PF01435:Peptidase family M48	2.09441	1.27922e-05	2.37523	5.56244e-07
CGTRNA_RS00175	cg0045	cg0045	31677	32702	1026	sp|P0AGI1|RBSC_ECOLI Ribose transport system permease protein RbsC OS=Escherichia coli (strain K12) GN=rbsC PE=1 SV=1//5.19105e-08 && PF02653:Branched-chain amino acid transport system / permease component	-0.698934	0.000325529	0.50264	0.043433
CGTRNA_RS00180	cg0046	cg0046	32699	33460	762	sp|Q2SJ99|RBSA_HAHCH Ribose import ATP-binding protein RbsA OS=Hahella chejuensis (strain KCTC 2396) GN=rbsA PE=3 SV=1//2.95677e-12 && PF00005:ABC transporter	-0.627765	0.00224612	0.620786	0.0151701
CGTRNA_RS00225	cg0057	pknB	40573	42513	1941	sp|Q8NU98|PKN1_CORGL Probable serine/threonine-protein kinase PknB OS=Corynebacterium glutamicum (strain ATCC 13032 / DSM 20300 / JCM 1318 / LMG 3730 / NCIMB 10025) GN=pknB PE=3 SV=1//0 && PF03793:PASTA domain|PF00069:Protein kinase domain	-1.47867	3.50483e-08	0.640518	0.0246538
CGTRNA_RS00230	cg0059	pknA	42510	43919	1410	sp|Q8NU97|PKN2_CORGL Serine/threonine-protein kinases PknA OS=Corynebacterium glutamicum (strain ATCC 13032 / DSM 20300 / JCM 1318 / LMG 3730 / NCIMB 10025) GN=pknA PE=3 SV=1//0 && PF00069:Protein kinase domain	-1.11778	1.32123e-05	1.39989	2.11642e-07
CGTRNA_RS00235	cg0060	pbpA	43923	45347	1425	sp|A0QNG3|PBPA_MYCS2 Penicillin-binding protein A OS=Mycobacterium smegmatis (strain ATCC 700084 / mc(2)155) GN=pbpA PE=3 SV=1//2.06339e-107 && PF00905:Penicillin binding protein transpeptidase domain	-0.662894	0.0137867	1.76823	8.59924e-12
CGTRNA_RS00245	cg0062	ppp	46666	48021	1356	sp|P9WHW4|PSTP_MYCTO PP2C-family Ser/Thr phosphatase OS=Mycobacterium tuberculosis (strain CDC 1551 / Oshkosh) GN=pstP PE=3 SV=1//9.13572e-74 && PF13672:Protein phosphatase 2C	0.606791	0.000792165	0.80914	0.000447664
CGTRNA_RS00250	cg0063	cg0063	48021	48485	465	sp|P9WJB5|FHAB_MYCTU FHA domain-containing protein FhaB OS=Mycobacterium tuberculosis (strain ATCC 25618 / H37Rv) GN=fhaB PE=1 SV=1//8.0275e-26 && PF00498:FHA domain	1.23137	1.16643e-10	0.672876	0.00641833
CGTRNA_RS00255	cg0064	cg0064	48502	49398	897	sp|P71590|FHAA_MYCTU FHA domain-containing protein FhaA OS=Mycobacterium tuberculosis (strain ATCC 25618 / H37Rv) GN=fhaA PE=1 SV=1//2.03151e-08 && PF00498:FHA domain|PF12401:Protein of unknown function (DUF2662)	1.04274	1.31721e-07	-0.821307	0.00046073
CGTRNA_RS00275	cg0066	cg0066	50963	51436	474	-//- && -	-0.561	0.0375227	-1.75864	5.69265e-07
CGTRNA_RS00280	cg0067	gabD3	51623	53095	1473	sp|Q8GAI8|SSDH_ARTNI Succinate-semialdehyde dehydrogenase OS=Arthrobacter nicotinovorans GN=sad PE=1 SV=1//0 && PF00171:Aldehyde dehydrogenase family	0.848941	5.56492e-05	0.79656	0.00198671
CGTRNA_RS00290	cg0071	cg0071	54179	55549	1371	sp|P54435|YRKH_BACSU Uncharacterized protein YrkH OS=Bacillus subtilis (strain 168) GN=yrkH PE=3 SV=2//3.87029e-20 && PF00581:Rhodanese-like domain|PF00753:Metallo-beta-lactamase superfamily	2.53339	0.00408375	3.47788	1.68007e-05
CGTRNA_RS00305	cg0074	cg0074	56677	57270	594	sp|P73801|Y1261_SYNY3 Uncharacterized protein slr1261 OS=Synechocystis sp. (strain PCC 6803 / Kazusa) GN=slr1261 PE=3 SV=1//5.92147e-23 && PF00581:Rhodanese-like domain|PF11127:Protein of unknown function (DUF2892)	5.25161	0.0144419	7.32202	2.23113e-05
CGTRNA_RS00310	cg0075	cg0075	57397	57654	258	sp|A0PLB8|CSOR_MYCUA Copper-sensing transcriptional repressor CsoR OS=Mycobacterium ulcerans (strain Agy99) GN=csoR PE=3 SV=2//3.82179e-09 && PF02583:Metal-sensitive transcriptional repressor	-2.11253	5.61542e-09	-1.7778	2.44068e-07
CGTRNA_RS00340	cg0081	cg0081	63591	64040	450	-//- && PF14832:Putative oxalocrotonate tautomerase enzyme	-0.440081	0.0355307	-1.62404	3.97126e-09
CGTRNA_RS00345	cg0082	cg0082	64190	65461	1272	-//- && PF00654:Voltage gated chloride channel	1.01146	0.00968322	1.33671	0.00088233
CGTRNA_RS00385	cg0092	cg0092	73845	74276	432	-//- && -	0.601843	0.00372286	-0.819372	0.00279728
CGTRNA_RS00430	cg0105	cg0105	85096	85404	309	-//- && -	1.0884	0.00232616	-1.12662	0.00161471
CGTRNA_RS00440	cg0107	cg0107	85661	86221	561	-//- && -	0.370302	0.038642	-1.21696	1.22967e-06
CGTRNA_RS00450	cg0109	cg0109	87559	88533	975	sp|Q79F14|ESTB_BACSU Extracellular esterase EstB OS=Bacillus subtilis (strain 168) GN=estB PE=1 SV=1//6.42785e-11 && PF00561:alpha/beta hydrolase fold	-0.75897	0.000733334	-0.797935	0.00436932
CGTRNA_RS00520	cg0123	cg0123	101610	103436	1827	sp|Q1CZI7|HTPG_MYXXD Chaperone protein HtpG OS=Myxococcus xanthus (strain DK 1622) GN=htpG PE=3 SV=1//4.85343e-30 && PF13589:Histidine kinase-, DNA gyrase B-, and HSP90-like ATPase	-0.676514	0.0493437	1.60937	1.35083e-08
CGTRNA_RS00525	cg0124	amn	103504	104913	1410	sp|P0AE12|AMN_ECOLI AMP nucleosidase OS=Escherichia coli (strain K12) GN=amn PE=1 SV=1//7.12411e-100 && PF01048:Phosphorylase superfamily|PF10423:Bacterial AMP nucleoside phosphorylase N-terminus	0.911421	0.00066035	0.756886	0.00499904
CGTRNA_RS00530	cg0126	cg0126	105171	105773	603	-//- && -	1.4388	0.0343243	1.50188	0.0396821
CGTRNA_RS00545	cg0129	putA	107445	110894	3450	sp|P10503|PUTA_SALTY Bifunctional protein PutA OS=Salmonella typhimurium (strain LT2 / SGSC1412 / ATCC 700720) GN=putA PE=2 SV=4//2.25237e-54 && PF01619:Proline dehydrogenase|PF00171:Aldehyde dehydrogenase family	1.44497	4.61501e-06	1.06024	7.59845e-05
CGTRNA_RS00550	cg0131	cg0131	111375	112322	948	sp|P77735|YAJO_ECOLI Uncharacterized oxidoreductase YajO OS=Escherichia coli (strain K12) GN=yajO PE=3 SV=2//8.41527e-37 && PF00248:Aldo/keto reductase family	2.12838	1.03638e-25	0.966688	0.000324295
CGTRNA_RS00555	cg0133	cg0133	112471	114087	1617	sp|P46133|ABGT_ECOLI p-aminobenzoyl-glutamate transport protein OS=Escherichia coli (strain K12) GN=abgT PE=1 SV=3//3.80439e-86 && PF03806:AbgT putative transporter family	5.7402	3.34272e-62	1.52567	1.9186e-06
CGTRNA_RS00560	cg0134	cg0134	114094	115482	1389	sp|Q8IYS1|P20D2_HUMAN Peptidase M20 domain-containing protein 2 OS=Homo sapiens GN=PM20D2 PE=1 SV=2//3.2787e-53 && PF01546:Peptidase family M20/M25/M40|PF07687:Peptidase dimerisation domain	3.58192	2.96045e-25	0.859593	0.00426252
CGTRNA_RS00565	cg0135	cg0135	115579	115947	369	sp|P0ADM3|YIDH_SHIFL Inner membrane protein YidH OS=Shigella flexneri GN=yidH PE=3 SV=1//1.07581e-12 && PF02656:Domain of unknown function (DUF202)	2.83527	4.73281e-18	0.977218	0.0139823
CGTRNA_RS00570	cg0136	cg0136	115950	116267	318	-//- && PF02656:Domain of unknown function (DUF202)	3.30043	2.42257e-20	1.21616	0.00412555
CGTRNA_RS00585	cg0139	cg0139	118808	119590	783	sp|D4GYE7|GLPR_HALVD HTH-type transcriptional regulator GlpR OS=Haloferax volcanii (strain ATCC 29605 / DSM 3757 / JCM 8879 / NBRC 14742 / NCIMB 2012 / VKM B-1768 / DS2) GN=glpR PE=2 SV=1//2.55295e-24 && PF00455:DeoR C terminal sensor domain|PF08220:DeoR-like helix-turn-helix domain	-2.0479	1.97037e-23	-0.864709	0.000516194
CGTRNA_RS00590	cg0141	cg0141	120022	120414	393	sp|O32161|YURT_BACSU Uncharacterized protein YurT OS=Bacillus subtilis (strain 168) GN=yurT PE=3 SV=1//1.53589e-48 && PF00903:Glyoxalase/Bleomycin resistance protein/Dioxygenase superfamily	0.709718	0.000968054	-1.80096	3.84532e-11
CGTRNA_RS00595	cg0142	sixA	120411	120923	513	sp|P9WGF9|Y1276_MYCTU Uncharacterized protein Rv1276c OS=Mycobacterium tuberculosis (strain ATCC 25618 / H37Rv) GN=Rv1276c PE=1 SV=1//2.4976e-23 && PF00300:Histidine phosphatase superfamily (branch 1)	-0.886002	0.00231459	-1.21684	7.54017e-05
CGTRNA_RS00615	cg0147	xylB	124972	126354	1383	sp|P12867|XYLB_ACTM4 Xylulose kinase OS=Actinoplanes missouriensis (strain ATCC 14538 / DSM 43046 / CBS 188.64 / JCM 3121 / NCIMB 12654 / NBRC 102363 / 431) GN=xylB PE=3 SV=3//1.37741e-122 && PF00370:FGGY family of carbohydrate kinases, N-terminal domain|PF02782:FGGY family of carbohydrate kinases, C-terminal domain	0.595517	0.0159195	0.839307	0.00285654
CGTRNA_RS00660	cg0156	cg0156	132969	134114	1146	sp|P64706|Y495_MYCBO Uncharacterized protein Mb0495 OS=Mycobacterium bovis (strain ATCC BAA-935 / AF2122/97) GN=Mb0495 PE=4 SV=1//1.75525e-12 && PF12802:MarR family|PF00480:ROK family	0.483592	0.0333537	0.721329	0.017262
CGTRNA_RS00685	cg0162	cg0162	138792	140333	1542	-//- && -	-1.84142	8.81335e-12	1.65767	1.95011e-08
CGTRNA_RS00690	cg0163	cg0163	140330	141793	1464	sp|P96587|YDAM_BACSU Uncharacterized glycosyltransferase YdaM OS=Bacillus subtilis (strain 168) GN=ydaM PE=3 SV=1//8.80756e-20 && PF13641:Glycosyltransferase like family 2	-1.51081	7.92887e-07	1.86141	2.31671e-11
CGTRNA_RS00720	cg0171	cg0171	147239	147574	336	-//- && PF03724:META domain	-1.58291	1.27617e-05	-2.43489	1.05047e-09
CGTRNA_RS00725	cg0172	panD	147571	147981	411	sp|Q9X4N0|PAND_CORGL Aspartate 1-decarboxylase OS=Corynebacterium glutamicum (strain ATCC 13032 / DSM 20300 / JCM 1318 / LMG 3730 / NCIMB 10025) GN=panD PE=1 SV=1//5.02532e-93 && PF02261:Aspartate decarboxylase	-0.993156	0.000331972	-2.1379	4.27509e-10
CGTRNA_RS00735	cg0174	cg0174	149792	150931	1140	sp|P75747|ABRB_ECOLI Protein AbrB OS=Escherichia coli (strain K12) GN=abrB PE=3 SV=2//9.94686e-11 && PF05145:Transition state regulatory protein AbrB	2.00261	1.72287e-11	1.58746	7.232e-07
CGTRNA_RS00740	cg0175	cg0175	150964	151455	492	-//- && -	2.13627	4.48254e-24	-1.03701	7.35702e-05
CGTRNA_RS00750	cg0177	cg0177	152441	152818	378	-//- && -	-0.675591	0.0021798	-0.598637	0.0412218
CGTRNA_RS00800	cg0188	cg0188	161361	162269	909	-//- && -	-1.31426	1.03875e-14	-2.88611	1.26523e-38
CGTRNA_RS00825	cg0195	cg0195	166458	167423	966	-//- && PF13367:Protease prsW family	-1.05598	7.32249e-08	0.737953	0.0153375
CGTRNA_RS00830	cg0196	cg0196	167835	168596	762	sp|O34817|YVOA_BACSU HTH-type transcriptional repressor YvoA OS=Bacillus subtilis (strain 168) GN=yvoA PE=1 SV=1//5.92332e-25 && PF07702:UTRA domain|PF00392:Bacterial regulatory proteins, gntR family	-2.56084	1.07112e-08	-0.956268	0.0201216
CGTRNA_RS00855	cg0202	iolD	173366	175279	1914	sp|Q898E8|IOLD_CLOTE 3D-(3,5/4)-trihydroxycyclohexane-1,2-dione hydrolase OS=Clostridium tetani (strain Massachusetts / E88) GN=iolD PE=3 SV=2//9.11029e-144 && PF02776:Thiamine pyrophosphate enzyme, N-terminal TPP binding domain|PF00205:Thiamine pyrophosphate enzyme, central domain|PF02775:Thiamine pyrophosphate enzyme, C-terminal TPP binding domain	1.39288	0.000131065	1.12965	0.00788817
CGTRNA_RS00915	cg0215	cspA	186509	186712	204	sp|A0R5E1|CSPA_MYCS2 Probable cold shock protein A OS=Mycobacterium smegmatis (strain ATCC 700084 / mc(2)155) GN=cspA PE=1 SV=1//1.23747e-33 && PF00313:'Cold-shock' DNA-binding domain	-2.31714	1.66987e-39	-2.55307	5.08539e-30
CGTRNA_RS00930	cg0218	cg0218	187688	188104	417	sp|Q43161|CAMT_STELP Caffeoyl-CoA O-methyltransferase OS=Stellaria longipes PE=2 SV=1//8.66581e-08 && PF01596:O-methyltransferase	-1.79216	1.85185e-10	-2.39513	3.97694e-12
CGTRNA_RS00960	cg0228	cg0228	194602	195039	438	sp|P26489|FIXL_AZOC5 Sensor protein FixL OS=Azorhizobium caulinodans (strain ATCC 43989 / DSM 5975 / JCM 20966 / NBRC 14845 / NCIMB 13405 / ORS 571) GN=fixL PE=3 SV=1//2.6821e-10 && PF08448:PAS fold	1.9474	3.5083e-06	-1.86427	0.000248883
CGTRNA_RS00965	cg0229	gltB	195241	199773	4533	sp|P96218|GLTB_MYCTU Glutamate synthase [NADPH] large chain OS=Mycobacterium tuberculosis (strain ATCC 25618 / H37Rv) GN=gltB PE=1 SV=3//0 && PF01645:Conserved region in glutamate synthase|PF04898:Glutamate synthase central domain|PF00310:Glutamine amidotransferases class-II|PF01493:GXGXG motif	1.4651	0.00202656	3.35567	0.012543
CGTRNA_RS00975	cg0233	cg0233	201758	203245	1488	-//- && PF04107:Glutamate-cysteine ligase family 2(GCS2)	-2.18883	1.70466e-26	-1.12048	5.4324e-07
CGTRNA_RS00980	cg0235	embC	203539	206979	3441	sp|Q50393|EMBC_MYCSM Probable arabinosyltransferase C OS=Mycobacterium smegmatis GN=embC PE=3 SV=2//0 && PF04602:Mycobacterial cell wall arabinan synthesis protein|PF14896:EmbC C-terminal domain	-1.82202	7.18907e-23	1.29317	1.95148e-09
CGTRNA_RS00985	cg0236	cg0236	207005	209038	2034	sp|Q8NTW4|AFTA_CORGL Arabinofuranosyltransferase AftA OS=Corynebacterium glutamicum (strain ATCC 13032 / DSM 20300 / JCM 1318 / LMG 3730 / NCIMB 10025) GN=aftA PE=3 SV=1//0 && PF12250:Arabinofuranosyltransferase N terminal|PF12249:Arabinofuranosyltransferase A C terminal	-1.28035	1.14372e-10	0.705555	0.00405476
CGTRNA_RS00990	cg0237	cg0237	209208	209969	762	sp|A0R610|DPRE2_MYCS2 NAD-dependent decaprenylphosphoryl-D-2-keto erythropentose reductase OS=Mycobacterium smegmatis (strain ATCC 700084 / mc(2)155) GN=dprE2 PE=1 SV=1//5.65759e-83 && PF00106:short chain dehydrogenase	-2.41735	4.24813e-45	-0.507002	0.048114
CGTRNA_RS00995	cg0238	cg0238	209990	211456	1467	sp|A0R607|DPRE1_MYCS2 FAD-dependent decaprenylphosphoryl-beta-D-ribofuranose 2-oxidase OS=Mycobacterium smegmatis (strain ATCC 700084 / mc(2)155) GN=dprE1 PE=1 SV=2//0 && PF04030:D-arabinono-1,4-lactone oxidase|PF01565:FAD binding domain	-2.33158	4.62494e-33	-1.13167	1.06073e-06
CGTRNA_RS01045	cg0248	cg0248	217139	217930	792	sp|Q56903|RFBE_YEREN O-antigen export system ATP-binding protein RfbE OS=Yersinia enterocolitica GN=rfbE PE=3 SV=1//3.80268e-70 && PF00005:ABC transporter	-2.0657	1.35182e-12	1.51444	7.99293e-09
CGTRNA_RS01080	cg0254	cg0254	222208	223695	1488	sp|Q45068|ALST_BACSU Amino-acid carrier protein AlsT OS=Bacillus subtilis (strain 168) GN=alsT PE=2 SV=1//1.94217e-126 && PF01235:Sodium:alanine symporter family	1.99787	2.12414e-08	1.49149	0.000162508
CGTRNA_RS01095	cg0257	cg0257	225240	226313	1074	sp|P9WMN7|MOEZ_MYCTU Probable adenylyltransferase/sulfurtransferase MoeZ OS=Mycobacterium tuberculosis (strain ATCC 25618 / H37Rv) GN=moeZ PE=1 SV=1//4.28967e-63 && PF00899:ThiF family|PF00581:Rhodanese-like domain	-1.31769	3.38831e-06	0.934574	0.00115233
CGTRNA_RS01105	cg0259	moaB	226758	227219	462	sp|P59014|MOACB_CHLTE Molybdenum cofactor biosynthesis bifunctional protein OS=Chlorobium tepidum (strain ATCC 49652 / DSM 12025 / NBRC 103806 / TLS) GN=moaCB PE=3 SV=1//8.90694e-22 && PF00994:Probable molybdopterin binding domain	0.590658	0.038584	0.82803	0.0065106
CGTRNA_RS01115	cg0261	moeA1	227701	228885	1185	sp|P9WJQ5|MOEA2_MYCTU Molybdopterin molybdenumtransferase 2 OS=Mycobacterium tuberculosis (strain ATCC 25618 / H37Rv) GN=moaE2 PE=1 SV=1//5.23319e-34 && PF00994:Probable molybdopterin binding domain|PF03453:MoeA N-terminal region (domain I and II)|PF03454:MoeA C-terminal region (domain IV)	-0.960594	0.00104213	0.990768	0.000845593
CGTRNA_RS01120	cg0262	modB	228889	229728	840	sp|P9WG13|MODB_MYCTU Molybdenum transport system permease protein ModB OS=Mycobacterium tuberculosis (strain ATCC 25618 / H37Rv) GN=modB PE=3 SV=1//2.39923e-37 && PF00528:Binding-protein-dependent transport system inner membrane component	-1.27414	0.000495384	0.884096	0.00327571
CGTRNA_RS01205	cg0280	cg0280	242941	243435	495	-//- && -	-0.591547	0.00822807	-1.97447	1.66133e-12
CGTRNA_RS01210	cg0281	cg0281	243435	243914	480	sp|P68397|TADA_SHIFL tRNA-specific adenosine deaminase OS=Shigella flexneri GN=tadA PE=3 SV=2//1.96118e-33 && PF14437:MafB19-like deaminase	-0.706624	0.00724891	-0.719351	0.0163605
CGTRNA_RS01230	cg0284	cg0284	244903	247308	2406	sp|P96687|YDFJ_BACSU Membrane protein YdfJ OS=Bacillus subtilis (strain 168) GN=ydfJ PE=2 SV=1//4.24122e-117 && PF03176:MMPL family	-0.814433	0.000863898	1.17579	2.29127e-06
CGTRNA_RS01260	cg0291	cg0291	252828	253820	993	-//- && PF00775:Dioxygenase	0.774285	0.0149255	-1.3964	5.12508e-06
CGTRNA_RS01280	cg0294	aspB	256618	257898	1281	sp|A0R5R7|Y6286_MYCS2 Putative aminotransferase MSMEG_6286/MSMEI_6121 OS=Mycobacterium smegmatis (strain ATCC 700084 / mc(2)155) GN=MSMEG_6286 PE=1 SV=1//3.94169e-172 && PF12897:Alanine-glyoxylate amino-transferase	0.742867	7.72694e-06	0.935673	3.17343e-05
CGTRNA_RS01285	cg0295	cg0295	257901	258533	633	-//- && -	0.980963	1.8716e-05	1.98619	4.29658e-18
CGTRNA_RS01325	cg0303	leuA	266152	268002	1851	sp|P42455|LEU1_CORGL 2-isopropylmalate synthase OS=Corynebacterium glutamicum (strain ATCC 13032 / DSM 20300 / JCM 1318 / LMG 3730 / NCIMB 10025) GN=leuA PE=3 SV=1//0 && PF00682:HMGL-like|PF08502:LeuA allosteric (dimerisation) domain	1.90596	3.06981e-09	2.2733	0.00888789
CGTRNA_RS01345	cg0308	cg0308	271761	273197	1437	-//- && -	1.13086	0.000111548	1.0417	0.0020765
CGTRNA_RS01355	cg0310	katA	274324	275874	1551	sp|P29422|CATA_MICLU Catalase OS=Micrococcus luteus GN=katA PE=1 SV=2//0 && PF06628:Catalase-related immune-responsive|PF00199:Catalase	1.52346	8.85426e-21	0.500688	0.0376062
CGTRNA_RS01380	cg0316	cg0316	277984	278277	294	-//- && -	-2.34512	1.43267e-15	-4.47043	5.75334e-26
CGTRNA_RS01455	cg0333	cg0333	291800	292420	621	sp|P0ABP6|DEDA_ECOLI Protein DedA OS=Escherichia coli (strain K12) GN=dedA PE=1 SV=1//4.62135e-11 && PF09335:SNARE associated Golgi protein	1.54515	6.93747e-09	-1.07721	0.00899451
CGTRNA_RS01465	cg0334	cg0334	292594	293502	909	sp|P50733|YPBG_BACSU Uncharacterized protein YpbG OS=Bacillus subtilis (strain 168) GN=ypbG PE=3 SV=1//8.23078e-12 && PF12850:Calcineurin-like phosphoesterase superfamily domain	-0.626855	0.0122136	-1.20495	2.85004e-05
CGTRNA_RS01490	cg0339	cg0339	297792	298253	462	sp|O96876|TCP17_TRYCR Protein TCP17 OS=Trypanosoma cruzi GN=TCP17 PE=1 SV=1//3.44309e-15 && PF14588:YjgF/chorismate_mutase-like, putative endoribonuclease	-0.485866	0.0120327	-1.16306	1.1002e-06
CGTRNA_RS01505	cg0343	cg0343	301509	301976	468	-//- && PF01047:MarR family	-3.51116	2.70033e-12	-1.28136	0.00436642
CGTRNA_RS01530	cg0349	cg0349	305876	306703	828	sp|Q1LZ83|LACB2_BOVIN Beta-lactamase-like protein 2 OS=Bos taurus GN=LACTB2 PE=2 SV=1//3.46373e-20 && PF00753:Metallo-beta-lactamase superfamily	-1.481	3.16744e-19	-1.30952	2.25947e-09
CGTRNA_RS01535	cg0350	cg0350	306779	307462	684	sp|Q79VI7|CRPL_CORGL CRP-like cAMP-activated global transcriptional regulator OS=Corynebacterium glutamicum (strain ATCC 13032 / DSM 20300 / JCM 1318 / LMG 3730 / NCIMB 10025) GN=glxR PE=1 SV=1//1.11283e-156 && PF00027:Cyclic nucleotide-binding domain|PF13545:Crp-like helix-turn-helix domain	1.44287	4.11562e-13	-0.748902	0.00178153
CGTRNA_RS01570	cg0359	cg0359	312906	313457	552	-//- && PF07332:Putative Actinobacterial Holin-X, holin superfamily III	0.433089	0.0127276	-0.803422	0.000703042
CGTRNA_RS01580	cg0362	cg0362	314944	316005	1062	sp|P9WKX7|Y3660_MYCTU Uncharacterized protein Rv3660c OS=Mycobacterium tuberculosis (strain ATCC 25618 / H37Rv) GN=Rv3660c PE=2 SV=1//9.55312e-13 && -	4.28532	0.000105393	4.06375	0.000492217
CGTRNA_RS01595	cg0365	cg0365	317893	318468	576	-//- && PF00482:Type II secretion system (T2SS), protein F	-1.20789	0.0315667	2.71151	1.54685e-15
CGTRNA_RS01620	cg0371	cspA2	322007	322210	204	sp|A0R5E1|CSPA_MYCS2 Probable cold shock protein A OS=Mycobacterium smegmatis (strain ATCC 700084 / mc(2)155) GN=cspA PE=1 SV=1//8.18136e-33 && PF00313:'Cold-shock' DNA-binding domain	-2.5943	3.7763e-52	-2.97979	3.03432e-41
CGTRNA_RS01625	cg0373	topA	322911	325901	2991	sp|P9WG49|TOP1_MYCTU DNA topoisomerase 1 OS=Mycobacterium tuberculosis (strain ATCC 25618 / H37Rv) GN=topA PE=1 SV=1//0 && PF01131:DNA topoisomerase|PF01751:Toprim domain|PF13368:Topoisomerase C-terminal repeat	0.762657	8.64039e-06	1.70368	4.54838e-16
CGTRNA_RS01660	cg0382	cg0382	330974	331537	564	-//- && -	4.21743	1.48226e-33	1.31057	0.0334336
CGTRNA_RS01685	cg0388	cg0388	336117	336752	636	sp|O67893|Y2135_AQUAE Uncharacterized protein aq_2135 OS=Aquifex aeolicus (strain VF5) GN=aq_2135 PE=3 SV=1//2.21454e-21 && PF00753:Metallo-beta-lactamase superfamily	-1.17202	1.35243e-09	0.618717	0.00949018
CGTRNA_RS01700	cg0391	rmlB2	338794	339729	936	sp|P9WN67|GALE_MYCTU UDP-glucose 4-epimerase OS=Mycobacterium tuberculosis (strain ATCC 25618 / H37Rv) GN=galE1 PE=1 SV=1//3.58555e-134 && PF16363:GDP-mannose 4,6 dehydratase	-0.578196	0.00825367	-0.994115	9.79581e-05
CGTRNA_RS01705	cg0393	cg0393	340193	340570	378	-//- && PF10066:Uncharacterized conserved protein (DUF2304)	-2.67327	2.13556e-15	-1.15822	0.000229265
CGTRNA_RS01710	cg0394	cg0394	340567	341277	711	sp|Q58619|Y1222_METJA Uncharacterized protein MJ1222 OS=Methanocaldococcus jannaschii (strain ATCC 43067 / DSM 2661 / JAL-1 / JCM 10045 / NBRC 100440) GN=MJ1222 PE=4 SV=1//5.72056e-33 && PF00535:Glycosyl transferase family 2	-1.67957	1.75749e-09	-1.63486	1.12358e-08
CGTRNA_RS01720	cg0396	cg0396	342418	343455	1038	sp|P36667|WBBL_ECOLI Rhamnosyltransferase WbbL OS=Escherichia coli (strain K12) GN=wbbL PE=1 SV=1//1.03224e-09 && PF00535:Glycosyl transferase family 2	0.536423	0.0119257	0.678499	0.0106763
CGTRNA_RS01725	cg0397	cg0397	343637	345721	2085	sp|P54602|YHCR_BACSU Endonuclease YhcR OS=Bacillus subtilis (strain 168) GN=yhcR PE=1 SV=1//4.71791e-40 && PF00149:Calcineurin-like phosphoesterase|PF02872:5'-nucleotidase, C-terminal domain	0.80369	0.0444607	1.23172	0.000574538
CGTRNA_RS01730	cg0399	cg0399	346108	346461	354	-//- && -	0.778205	0.000398673	-1.09229	0.00243137
CGTRNA_RS01770	cg0408	cg0408	354597	355847	1251	sp|P59985|Y3654_MYCBO Uncharacterized protein Mb3654 OS=Mycobacterium bovis (strain ATCC BAA-935 / AF2122/97) GN=Mb3654 PE=4 SV=1//2.54683e-19 && -	-1.31752	4.90114e-07	0.982248	0.000170526
CGTRNA_RS01780	cg0410	cg0410	357235	359241	2007	sp|P55577|Y4NA_RHISN Uncharacterized peptidase y4nA OS=Rhizobium sp. (strain NGR234) GN=NGR_a02410 PE=3 SV=1//4.23608e-133 && PF02897:Prolyl oligopeptidase, N-terminal beta-propeller domain|PF00326:Prolyl oligopeptidase family	1.45756	9.86525e-15	0.515669	0.0441048
CGTRNA_RS01790	cg0412	cg0412	360812	361906	1095	sp|Q99340|Y2769_CORGL Uncharacterized protein Cgl2769/cg3067 OS=Corynebacterium glutamicum (strain ATCC 13032 / DSM 20300 / JCM 1318 / LMG 3730 / NCIMB 10025) GN=Cgl2769 PE=4 SV=2//1.10827e-06 && PF06081:Aromatic acid exporter family member 1	-0.861717	0.00100542	-0.797919	0.00917776
CGTRNA_RS01795	cg0413	cmt1	362055	363152	1098	sp|P0C1D7|CSP1_CORML Protein PS1 OS=Corynebacterium melassecola GN=csp1 PE=4 SV=1//8.54118e-32 && PF00756:Putative esterase	-1.08139	6.56529e-09	-0.616452	0.00900158
CGTRNA_RS01800	cg0414	wzz	363825	365261	1437	sp|P96716|YWQD_BACSU Tyrosine-protein kinase YwqD OS=Bacillus subtilis (strain 168) GN=ywqD PE=1 SV=1//1.09577e-35 && PF02706:Chain length determinant protein|PF13614:AAA domain	-2.36046	7.16796e-38	-0.653917	0.00274728
CGTRNA_RS01815	cg0417	capD	366833	368647	1815	sp|P71052|EPSC_BACSU Probable polysaccharide biosynthesis protein EpsC OS=Bacillus subtilis (strain 168) GN=epsC PE=3 SV=1//1.20061e-109 && PF02719:Polysaccharide biosynthesis protein|PF13727:CoA-binding domain	-3.30943	9.97226e-75	0.835024	0.000173944
CGTRNA_RS01820	cg0418	cg0418	368648	369805	1158	sp|Q795J3|EPSN_BACSU Putative pyridoxal phosphate-dependent aminotransferase EpsN OS=Bacillus subtilis (strain 168) GN=epsN PE=2 SV=1//3.13986e-86 && PF01041:DegT/DnrJ/EryC1/StrS aminotransferase family	-3.32225	9.64003e-74	1.01682	4.49714e-06
CGTRNA_RS01825	cg0419	cg0419	369795	370409	615	sp|P71062|EPSL_BACSU Uncharacterized sugar transferase EpsL OS=Bacillus subtilis (strain 168) GN=epsL PE=2 SV=1//1.67936e-58 && PF02397:Bacterial sugar transferase	-3.35064	1.20993e-62	0.929687	3.93587e-05
CGTRNA_RS01885	cg0437	cg0437	383980	385191	1212	-//- && PF04932:O-Antigen ligase	-1.2035	1.10561e-09	-2.54048	1.74852e-26
CGTRNA_RS01890	cg0438	cg0438	385372	386196	825	sp|Q57287|Y1578_HAEIN Uncharacterized glycosyltransferase HI_1578 OS=Haemophilus influenzae (strain ATCC 51907 / DSM 11121 / KW20 / Rd) GN=HI_1578 PE=3 SV=1//7.18149e-23 && PF00535:Glycosyl transferase family 2	-1.06202	3.86546e-08	-3.24479	2.16945e-42
CGTRNA_RS01900	cg0441	lpd	387693	389102	1410	sp|Q8NTE1|DLDH_CORGL Dihydrolipoyl dehydrogenase OS=Corynebacterium glutamicum (strain ATCC 13032 / DSM 20300 / JCM 1318 / LMG 3730 / NCIMB 10025) GN=lpd PE=1 SV=1//0 && PF02852:Pyridine nucleotide-disulphide oxidoreductase, dimerisation domain|PF07992:Pyridine nucleotide-disulphide oxidoreductase	-1.11226	6.60357e-12	-0.760258	0.000678598
CGTRNA_RS01905	cg0442	galU2	389249	390172	924	sp|O31822|YNGB_BACSU Probable UTP--glucose-1-phosphate uridylyltransferase YngB OS=Bacillus subtilis (strain 168) GN=yngB PE=3 SV=1//1.29841e-58 && PF00483:Nucleotidyl transferase	-2.10762	5.82192e-16	-3.04308	5.96086e-43
CGTRNA_RS01910	cg0443	cg0443	390213	390734	522	sp|P45202|YBAK_HAEIN Cys-tRNA(Pro)/Cys-tRNA(Cys) deacylase YbaK OS=Haemophilus influenzae (strain ATCC 51907 / DSM 11121 / KW20 / Rd) GN=ybaK PE=1 SV=2//2.30514e-30 && PF04073:Aminoacyl-tRNA editing domain	-0.793917	0.0151069	-1.46139	9.61359e-05
CGTRNA_RS01915	cg0444	cg0444	390784	392208	1425	sp|Q8NTD8|RAMB_CORGL HTH-type transcriptional regulator RamB OS=Corynebacterium glutamicum (strain ATCC 13032 / DSM 20300 / JCM 1318 / LMG 3730 / NCIMB 10025) GN=ramB PE=2 SV=1//0 && PF01381:Helix-turn-helix|PF09856:Predicted transcriptional regulator (DUF2083)|PF06114:IrrE N-terminal-like domain	2.10857	3.80982e-08	0.870635	0.0462206
CGTRNA_RS01920	cg0445	sdhCD	392705	393478	774	-//- && PF01127:Succinate dehydrogenase/Fumarate reductase transmembrane subunit	-1.56296	3.30254e-05	0.912695	0.00018948
CGTRNA_RS01925	cg0446	sdhA	393495	395516	2022	sp|P08065|SDHA_BACSU Succinate dehydrogenase flavoprotein subunit OS=Bacillus subtilis (strain 168) GN=sdhA PE=3 SV=4//1.68452e-78 && PF02910:Fumarate reductase flavoprotein C-term|PF00890:FAD binding domain	-1.58166	1.30466e-09	1.97843	4.54527e-21
CGTRNA_RS01930	cg0447	sdhB	395516	396265	750	sp|P08066|SDHB_BACSU Succinate dehydrogenase iron-sulfur subunit OS=Bacillus subtilis (strain 168) GN=sdhB PE=3 SV=3//1.38414e-09 && PF13085:2Fe-2S iron-sulfur cluster binding domain|PF12838:4Fe-4S dicluster domain	-1.72763	1.70403e-22	1.96392	6.35592e-21
CGTRNA_RS01935	cg0448	cg0448	396324	396653	330	-//- && -	-0.963563	1.13109e-08	0.983079	5.94601e-06
CGTRNA_RS01945	cg0450	cg0450	397229	398206	978	-//- && PF06224:Winged helix DNA-binding domain	-1.29729	9.326e-06	-1.76826	5.24331e-07
CGTRNA_RS01955	cg0452	cg0452	399598	400020	423	-//- && -	-0.73235	0.00245689	-1.39704	1.63873e-08
CGTRNA_RS01975	cg0456	cg0456	402798	404432	1635	sp|P9WG85|Y1877_MYCTU Uncharacterized MFS-type transporter Rv1877 OS=Mycobacterium tuberculosis (strain ATCC 25618 / H37Rv) GN=Rv1877 PE=3 SV=1//4.1199e-81 && PF07690:Major Facilitator Superfamily	-0.941859	0.0172751	2.02869	8.72172e-10
CGTRNA_RS02010	cg0466	cg0466	410706	412547	1842	-//- && PF04213:Htaa	2.25549	0.0272883	3.44177	4.85656e-05
CGTRNA_RS02015	cg0467	cg0467	412556	413635	1080	sp|Q56991|HMUT_YERPE Hemin-binding periplasmic protein HmuT OS=Yersinia pestis GN=hmuT PE=1 SV=2//4.55436e-13 && PF01497:Periplasmic binding protein	1.0908	0.0370919	1.95312	3.33063e-05
CGTRNA_RS02020	cg0468	cg0468	413636	414712	1077	sp|Q56992|HMUU_YERPE Hemin transport system permease protein HmuU OS=Yersinia pestis GN=hmuU PE=1 SV=2//9.24626e-42 && PF01032:FecCD transport family	1.33618	6.92377e-06	1.20976	0.000279735
CGTRNA_RS02075	cg0482	gpmA	425176	425922	747	sp|Q8NTA5|GPMA_CORGL 2,3-bisphosphoglycerate-dependent phosphoglycerate mutase OS=Corynebacterium glutamicum (strain ATCC 13032 / DSM 20300 / JCM 1318 / LMG 3730 / NCIMB 10025) GN=gpmA PE=3 SV=1//7.12706e-175 && PF00300:Histidine phosphatase superfamily (branch 1)	-1.59608	6.15391e-24	-1.93996	3.5069e-20
CGTRNA_RS02080	cg0483	cgtS4	425933	427174	1242	sp|A0QR01|SENX3_MYCS2 Signal-transduction histidine kinase senX3 OS=Mycobacterium smegmatis (strain ATCC 700084 / mc(2)155) GN=senX3 PE=1 SV=1//1.21672e-119 && PF02518:Histidine kinase-, DNA gyrase B-, and HSP90-like ATPase|PF00512:His Kinase A (phospho-acceptor) domain	-1.26763	4.17468e-14	-1.08455	1.30962e-06
CGTRNA_RS02115	cg0490	proC	434885	435697	813	sp|P0C1E4|P5CR_CORGL Pyrroline-5-carboxylate reductase OS=Corynebacterium glutamicum (strain ATCC 13032 / DSM 20300 / JCM 1318 / LMG 3730 / NCIMB 10025) GN=proC PE=3 SV=1//1.01353e-177 && PF03807:NADP oxidoreductase coenzyme F420-dependent|PF14748:Pyrroline-5-carboxylate reductase dimerisation	0.963382	1.33074e-07	0.687895	0.00328845
CGTRNA_RS02120	cg0492	cg0492	435948	436139	192	sp|P9WKT7|Y500A_MYCTU Putative DNA-binding protein Rv0500A OS=Mycobacterium tuberculosis (strain ATCC 25618 / H37Rv) GN=Rv0500A PE=1 SV=1//4.5687e-25 && PF12728:Helix-turn-helix domain	-0.727941	0.0012132	-1.25921	9.51121e-07
CGTRNA_RS02190	cg0508	cg0508	450833	451912	1080	sp|P43951|Y131_HAEIN Uncharacterized protein HI_0131 OS=Haemophilus influenzae (strain ATCC 51907 / DSM 11121 / KW20 / Rd) GN=HI_0131 PE=1 SV=1//1.1689e-11 && PF13343:Bacterial extracellular solute-binding protein	-0.680344	0.0142698	-1.15941	0.00311807
CGTRNA_RS02225	cg0516	hemE	460019	461095	1077	sp|Q8NT75|DCUP_CORGL Uroporphyrinogen decarboxylase OS=Corynebacterium glutamicum (strain ATCC 13032 / DSM 20300 / JCM 1318 / LMG 3730 / NCIMB 10025) GN=hemE PE=3 SV=1//0 && PF01208:Uroporphyrinogen decarboxylase (URO-D)	-1.46014	3.93565e-07	-1.14233	1.41266e-05
CGTRNA_RS02235	cg0518	hemL	462556	463869	1314	sp|Q8NT73|GSA_CORGL Glutamate-1-semialdehyde 2,1-aminomutase OS=Corynebacterium glutamicum (strain ATCC 13032 / DSM 20300 / JCM 1318 / LMG 3730 / NCIMB 10025) GN=hemL PE=3 SV=1//0 && PF00202:Aminotransferase class-III	-0.784822	0.000218193	-1.36251	2.36742e-08
CGTRNA_RS02240	cg0519	cg0519	463866	464474	609	sp|O06391|Y525_MYCTU Uncharacterized protein Rv0525 OS=Mycobacterium tuberculosis (strain ATCC 25618 / H37Rv) GN=Rv0525 PE=1 SV=1//2.13925e-47 && PF00300:Histidine phosphatase superfamily (branch 1)	-2.00762	2.20726e-26	-1.29648	1.4496e-08
CGTRNA_RS02245	cg0520	cg0520	464481	465104	624	sp|A4IQF5|RESA_GEOTN Thiol-disulfide oxidoreductase ResA OS=Geobacillus thermodenitrificans (strain NG80-2) GN=resA PE=3 SV=1//2.74721e-08 && PF00578:AhpC/TSA family	-2.25302	1.76256e-31	-0.868992	0.000113389
CGTRNA_RS02250	cg0522	ccsA	465105	465911	807	sp|P45706|CCDA_BACSU Cytochrome c-type biogenesis protein CcdA OS=Bacillus subtilis (strain 168) GN=ccdA PE=3 SV=1//7.34613e-14 && PF02683:Cytochrome C biogenesis protein transmembrane region	-2.71492	2.48743e-33	-1.05071	3.8402e-06
CGTRNA_RS02255	cg0523	cg0523	465948	467573	1626	-//- && PF05140:ResB-like family	-3.05202	2.60038e-51	-0.845384	0.000420829
CGTRNA_RS02260	cg0524	ccsB	467647	468660	1014	sp|P22554|CCSA_GUITH Cytochrome c biogenesis protein CcsA OS=Guillardia theta GN=ccsA PE=3 SV=1//2.91161e-31 && PF01578:Cytochrome C assembly protein	-3.2667	8.11606e-70	-1.10018	1.14723e-06
CGTRNA_RS02280	cg0528	cg0528	471117	471419	303	-//- && -	-0.582989	0.00351452	-0.657663	0.020649
CGTRNA_RS02285	cg0530	cg0530	471598	471849	252	-//- && PF14012:Protein of unknown function (DUF4229)	-0.728322	0.00899503	0.799248	0.0150265
CGTRNA_RS02305	cg0534	cg0534	474993	475400	408	-//- && PF07681:DoxX	1.66276	0.0102915	2.94951	2.96948e-08
CGTRNA_RS02310	cg0535	cg0535	475485	477047	1563	sp|Q6FFQ0|KGSDH_ACIAD Alpha-ketoglutaric semialdehyde dehydrogenase OS=Acinetobacter baylyi (strain ATCC 33305 / BD413 / ADP1) GN=ACIAD0131 PE=1 SV=1//4.29894e-119 && PF00171:Aldehyde dehydrogenase family	1.5084	2.95546e-10	2.41033	2.66181e-20
CGTRNA_RS02315	cg0536	cg0536	477044	477994	951	sp|Q8NT57|KDGD_CORGL Probable 5-dehydro-4-deoxyglucarate dehydratase OS=Corynebacterium glutamicum (strain ATCC 13032 / DSM 20300 / JCM 1318 / LMG 3730 / NCIMB 10025) GN=Cgl0453 PE=3 SV=1//0 && PF00701:Dihydrodipicolinate synthetase family	1.2965	1.05312e-06	0.909224	0.00338253
CGTRNA_RS02320	cg0537	cg0537	478088	478972	885	sp|P77559|YNFL_ECOLI Uncharacterized HTH-type transcriptional regulator YnfL OS=Escherichia coli (strain K12) GN=ynfL PE=3 SV=1//9.05099e-45 && PF00126:Bacterial regulatory helix-turn-helix protein, lysR family|PF03466:LysR substrate binding domain	-1.75086	1.44318e-11	-0.974181	0.000583845
CGTRNA_RS02325	cg0538	cg0538	478985	479302	318	-//- && PF11829:Protein of unknown function (DUF3349)	-1.86941	6.11537e-17	-1.95368	1.27582e-15
CGTRNA_RS02345	cg0544	cg0544	481127	481390	264	-//- && -	-2.86064	5.80282e-15	0.660245	0.0281675
CGTRNA_RS02355	cg0548	menB	484102	485061	960	sp|A0QRD3|MENB_MYCS2 1,4-dihydroxy-2-naphthoyl-CoA synthase OS=Mycobacterium smegmatis (strain ATCC 700084 / mc(2)155) GN=menB PE=1 SV=1//1.6269e-170 && PF00378:Enoyl-CoA hydratase/isomerase	-0.916534	0.000143095	-1.11689	4.67824e-05
CGTRNA_RS02405	cg0559	ispB	494060	495112	1053	sp|P55785|HEPS2_GEOSE Heptaprenyl diphosphate synthase component 2 OS=Geobacillus stearothermophilus GN=hepT PE=3 SV=1//8.86898e-50 && PF00348:Polyprenyl synthetase	-0.846987	6.96735e-06	-1.80008	1.35212e-13
CGTRNA_RS02455	cg0565	cg0565	499921	501435	1515	-//- && PF07905:Purine catabolism regulatory protein-like family|PF13556:PucR C-terminal helix-turn-helix domain	0.775884	0.0222012	0.982927	0.00719657
CGTRNA_RS02460	cg0566	gabT	501576	502922	1347	sp|P9WQ79|GABT_MYCTU 4-aminobutyrate aminotransferase OS=Mycobacterium tuberculosis (strain ATCC 25618 / H37Rv) GN=gabT PE=1 SV=1//2.98045e-147 && PF00202:Aminotransferase class-III	2.88566	0.0289476	2.87946	0.0230894
CGTRNA_RS02475	cg0569	cg0569	505697	507649	1953	sp|O32619|COPA_HELFC Copper-transporting ATPase OS=Helicobacter felis (strain ATCC 49179 / NCTC 12436 / CS1) GN=copA PE=3 SV=1//8.68306e-59 && PF00122:E1-E2 ATPase|PF00702:haloacid dehalogenase-like hydrolase	-3.11751	4.64461e-47	-2.01449	4.5951e-14
CGTRNA_RS02480	cg0570	cg0570	507668	509083	1416	sp|P06108|P49_STRLI Protein p49 OS=Streptomyces lividans GN=p49 PE=4 SV=1//1.21071e-92 && PF13450:NAD(P)-binding Rossmann-like domain	-1.83167	1.85351e-12	-2.12081	5.83683e-22
CGTRNA_RS02485	cg0571	cg0571	509093	509698	606	-//- && PF04402:Protein of unknown function (DUF541)	-0.605079	0.0169415	-1.14398	4.67824e-05
CGTRNA_RS02595	cg0598	rplB	535075	535917	843	sp|Q8NT05|RL2_CORGL 50S ribosomal protein L2 OS=Corynebacterium glutamicum (strain ATCC 13032 / DSM 20300 / JCM 1318 / LMG 3730 / NCIMB 10025) GN=rplB PE=3 SV=1//1.37542e-174 && PF00181:Ribosomal Proteins L2, RNA binding domain|PF03947:Ribosomal Proteins L2, C-terminal domain	-0.632744	0.0152464	1.40576	3.33964e-07
CGTRNA_RS02600	cg0599	rpsS	535934	536212	279	sp|P66482|RS19_CORGL 30S ribosomal protein S19 OS=Corynebacterium glutamicum (strain ATCC 13032 / DSM 20300 / JCM 1318 / LMG 3730 / NCIMB 10025) GN=rpsS PE=3 SV=1//1.04183e-62 && PF00203:Ribosomal protein S19	-0.599372	0.0146614	1.40487	1.89613e-07
CGTRNA_RS02605	cg0600	rplV	536216	536578	363	sp|Q8NT02|RL22_CORGL 50S ribosomal protein L22 OS=Corynebacterium glutamicum (strain ATCC 13032 / DSM 20300 / JCM 1318 / LMG 3730 / NCIMB 10025) GN=rplV PE=3 SV=1//2.71031e-65 && PF00237:Ribosomal protein L22p/L17e	-0.604258	0.016645	1.4624	3.15541e-07
CGTRNA_RS02610	cg0601	rpsC	536578	537324	747	sp|Q8NT01|RS3_CORGL 30S ribosomal protein S3 OS=Corynebacterium glutamicum (strain ATCC 13032 / DSM 20300 / JCM 1318 / LMG 3730 / NCIMB 10025) GN=rpsC PE=3 SV=1//2.54177e-161 && PF00189:Ribosomal protein S3, C-terminal domain|PF07650:KH domain	-0.475639	0.0415022	1.55248	3.96068e-08
CGTRNA_RS02615	cg0602	rplP	537327	537743	417	sp|Q8NT00|RL16_CORGL 50S ribosomal protein L16 OS=Corynebacterium glutamicum (strain ATCC 13032 / DSM 20300 / JCM 1318 / LMG 3730 / NCIMB 10025) GN=rplP PE=3 SV=1//2.05632e-98 && PF00252:Ribosomal protein L16p/L10e	-0.866291	9.75647e-05	1.35077	3.55361e-06
CGTRNA_RS02620	cg0603	rpmC	537743	537973	231	sp|Q8NSZ9|RL29_CORGL 50S ribosomal protein L29 OS=Corynebacterium glutamicum (strain ATCC 13032 / DSM 20300 / JCM 1318 / LMG 3730 / NCIMB 10025) GN=rpmC PE=3 SV=1//1.68779e-48 && PF00831:Ribosomal L29 protein	-0.876091	4.51567e-05	1.2926	1.06657e-05
CGTRNA_RS02625	cg0604	rpsQ	537976	538254	279	sp|Q8NSZ7|RS17_CORGL 30S ribosomal protein S17 OS=Corynebacterium glutamicum (strain ATCC 13032 / DSM 20300 / JCM 1318 / LMG 3730 / NCIMB 10025) GN=rpsQ PE=3 SV=1//3.20392e-61 && PF00366:Ribosomal protein S17	-1.2056	1.55155e-10	0.980046	0.000665934
CGTRNA_RS02685	cg0620	cg0620	547457	548086	630	-//- && -	-1.91965	2.50371e-23	-2.43862	3.9614e-14
CGTRNA_RS02690	cg0621	cg0621	548183	548989	807	-//- && PF12822:ECF transporter, substrate-specific component	-2.22546	1.47328e-06	0.961361	0.0151589
CGTRNA_RS02695	cg0622	cg0622	548986	550695	1710	sp|Q82B58|Y5847_STRAW Putative ABC transporter ATP-binding protein SAV_5847 OS=Streptomyces avermitilis (strain ATCC 31267 / DSM 46492 / JCM 5070 / NCIMB 12804 / NRRL 8165 / MA-4680) GN=SAV_5847 PE=3 SV=1//1.00606e-159 && PF00005:ABC transporter	-1.91722	8.10677e-11	1.03103	0.00196127
CGTRNA_RS02700	cg0623	cg0623	550695	551807	1113	-//- && PF02361:Cobalt transport protein	-1.69315	9.44445e-11	0.965848	0.00131594
CGTRNA_RS02710	cg0625	cg0625	552944	554128	1185	-//- && -	-1.32331	6.4787e-13	-1.34938	6.05886e-06
CGTRNA_RS02785	cg0642	cg0642	563731	565632	1902	sp|O34796|YVKC_BACSU Uncharacterized phosphotransferase YvkC OS=Bacillus subtilis (strain 168) GN=yvkC PE=3 SV=1//7.45481e-27 && PF00391:PEP-utilising enzyme, mobile domain	2.33838	0.000350328	1.89569	0.00493999
CGTRNA_RS02790	cg0644	cg0644	565679	566773	1095	sp|O27190|PPSA_METTH Probable phosphoenolpyruvate synthase OS=Methanothermobacter thermautotrophicus (strain ATCC 29096 / DSM 1053 / JCM 10044 / NBRC 100330 / Delta H) GN=ppsA PE=3 SV=1//1.13797e-84 && PF01326:Pyruvate phosphate dikinase, PEP/pyruvate binding domain	3.62954	0.000173553	2.27365	0.0402372
CGTRNA_RS02815	cg0649	map1	571478	572272	795	sp|P9WK21|MAP11_MYCTU Methionine aminopeptidase 1 OS=Mycobacterium tuberculosis (strain ATCC 25618 / H37Rv) GN=map-1 PE=1 SV=1//1.06126e-88 && PF00557:Metallopeptidase family M24	-1.13958	0.000129123	0.586633	0.0197563
CGTRNA_RS02820	cg0650	cg0650	572432	573181	750	-//- && PF03734:L,D-transpeptidase catalytic domain	-2.05108	2.29951e-24	-1.49105	4.39641e-12
CGTRNA_RS02825	cg0651	infA	573409	573627	219	sp|Q4JTB8|IF1_CORJK Translation initiation factor IF-1 OS=Corynebacterium jeikeium (strain K411) GN=infA PE=3 SV=2//4.36903e-47 && PF01176:Translation initiation factor 1A / IF-1	-0.510102	0.0468978	-0.632025	0.00469898
CGTRNA_RS02885	cg0663	cma	584317	585624	1308	sp|O69687|FAMT_MYCTU Probable fatty acid methyltransferase Rv3720 OS=Mycobacterium tuberculosis (strain ATCC 25618 / H37Rv) GN=Rv3720 PE=3 SV=4//4.32955e-157 && PF02353:Mycolic acid cyclopropane synthetase	0.607448	0.0398505	1.06059	8.3374e-06
CGTRNA_RS02890	cg0664	cg0664	585824	586252	429	-//- && PF09656:Putative transmembrane protein (PGPGW)	1.03442	6.28746e-06	0.786719	0.00601588
CGTRNA_RS02945	cg0678	cg0678	598195	599706	1512	-//- && -	2.50856	0.00100542	2.62917	0.000332073
CGTRNA_RS02955	cg0680	cg0680	600020	600877	858	-//- && -	-0.913643	8.53176e-08	-0.595558	0.0176722
CGTRNA_RS02970	cg0683	cg0683	602812	604413	1602	sp|Q8NSS8|Y590_CORGL Uncharacterized transporter Cgl0590/cg0683 OS=Corynebacterium glutamicum (strain ATCC 13032 / DSM 20300 / JCM 1318 / LMG 3730 / NCIMB 10025) GN=Cgl0590 PE=3 SV=1//0 && PF02080:TrkA-C domain|PF06826:Predicted Permease Membrane Region	-3.05399	1.93455e-77	-0.612501	0.0177285
CGTRNA_RS03005	cg0690	groES	610349	610648	300	sp|Q8NSS1|CH10_CORGL 10 kDa chaperonin OS=Corynebacterium glutamicum (strain ATCC 13032 / DSM 20300 / JCM 1318 / LMG 3730 / NCIMB 10025) GN=groS PE=3 SV=1//2.55049e-65 && PF00166:Chaperonin 10 Kd subunit	1.6627	3.68465e-13	1.22665	6.25634e-06
CGTRNA_RS03070	cg0704	cg0704	623178	623621	444	-//- && PF15583:Immunity protein 68	-1.04986	0.000135103	-1.18104	2.49824e-06
CGTRNA_RS03075	cg0706	cg0706	623918	625096	1179	-//- && PF09922:Cell wall-active antibiotics response 4TMS YvqF|PF04024:PspC domain	0.681438	0.00170367	-1.17818	0.000108711
CGTRNA_RS03080	cg0707	cgtS7	625261	626403	1143	sp|O07527|YHCY_BACSU Sensor histidine kinase YhcY OS=Bacillus subtilis (strain 168) GN=yhcY PE=3 SV=1//5.75975e-06 && PF04024:PspC domain	0.922589	0.00394118	0.958626	0.0058128
CGTRNA_RS03085	cg0709	cgtR7	626446	627138	693	sp|Q7WZY4|NREC_STACT Oxygen regulatory protein NreC OS=Staphylococcus carnosus (strain TM300) GN=nreC PE=1 SV=1//3.57796e-18 && PF00072:Response regulator receiver domain|PF00196:Bacterial regulatory proteins, luxR family	-0.607204	0.00236908	-1.02156	2.54073e-05
CGTRNA_RS03090	cg0710	cg0710	627138	627464	327	-//- && -	-0.949144	4.68012e-05	-0.656733	0.0238586
CGTRNA_RS03095	cg0711	cg0711	627528	627971	444	-//- && -	-0.653764	0.0308013	-1.60619	5.9499e-06
CGTRNA_RS03100	cg0712	cg0712	628035	628856	822	-//- && -	-1.62428	5.8816e-07	-2.55457	7.44944e-11
CGTRNA_RS03150	cg0722	cg0722	637547	639685	2139	sp|Q9XA86|MMPLD_STRCO Putative membrane protein SCO0839 OS=Streptomyces coelicolor (strain ATCC BAA-471 / A3(2) / M145) GN=SCO0839 PE=3 SV=1//1.85096e-131 && PF03176:MMPL family	1.8791	9.61886e-14	0.864922	0.00362411
CGTRNA_RS03165	cg0726	cg0726	641690	642340	651	sp|Q5URA7|YR877_MIMIV Putative lipocalin R877 OS=Acanthamoeba polyphaga mimivirus GN=MIMI_R877 PE=1 SV=1//1.85135e-11 && PF08212:Lipocalin-like domain	2.05576	4.9148e-22	-1.26461	0.000274976
CGTRNA_RS03185	cg0732	cg0732	646634	649051	2418	-//- && PF02687:FtsX-like permease family	-1.00979	0.000637153	2.35921	4.36893e-21
CGTRNA_RS03265	cg0752	cg0752	663840	665222	1383	sp|O32076|YUAG_BACSU Uncharacterized protein YuaG OS=Bacillus subtilis (strain 168) GN=yuaG PE=4 SV=1//1.89806e-17 && PF01145:SPFH domain / Band 7 family|PF15975:Flotillin	0.857592	5.31435e-05	1.26838	3.23523e-07
CGTRNA_RS03330	cg0767	cg0767	681601	682500	900	sp|P65050|Y2919_MYCBO Uncharacterized protein Mb2919c OS=Mycobacterium bovis (strain ATCC BAA-935 / AF2122/97) GN=Mb2919c PE=3 SV=1//1.22264e-12 && PF04954:Siderophore-interacting protein|PF08021:Siderophore-interacting FAD-binding domain	2.2643	0.0246723	4.63223	6.23532e-11
CGTRNA_RS03345	cg0770	cg0770	684341	685336	996	sp|O31568|YFIZ_BACSU Probable siderophore transport system permease protein YfiZ OS=Bacillus subtilis (strain 168) GN=yfiZ PE=1 SV=1//7.06476e-47 && PF01032:FecCD transport family	0.997408	0.0108238	1.91505	2.62478e-08
CGTRNA_RS03370	cg0775	cg0775	689620	689811	192	-//- && -	-0.790303	0.000212941	-1.08603	9.60747e-06
CGTRNA_RS03375	cg0776	cg0776	690386	691363	978	-//- && PF01497:Periplasmic binding protein	-1.07312	0.00932927	0.888274	0.00305147
CGTRNA_RS03390	cg0779	trpS	693355	694392	1038	sp|Q8NSJ4|SYW_CORGL Tryptophan--tRNA ligase OS=Corynebacterium glutamicum (strain ATCC 13032 / DSM 20300 / JCM 1318 / LMG 3730 / NCIMB 10025) GN=trpS PE=3 SV=1//0 && PF00579:tRNA synthetases class I (W and Y)	-0.731083	2.43573e-05	-1.34042	1.77489e-09
CGTRNA_RS03395	cg0780	cg0780	694501	695586	1086	sp|P37642|YHJD_ECOLI Inner membrane protein YhjD OS=Escherichia coli (strain K12) GN=yhjD PE=1 SV=1//1.03636e-42 && PF03631:Virulence factor BrkB	1.55012	5.18743e-19	0.811934	0.00088388
CGTRNA_RS03400	cg0781	cg0781	695645	696550	906	-//- && PF06271:RDD family	0.776048	1.883e-06	0.876319	0.00019003
CGTRNA_RS03405	cg0782	dac	696547	697752	1206	sp|P35150|DACB_BACSU D-alanyl-D-alanine carboxypeptidase DacB OS=Bacillus subtilis (strain 168) GN=dacB PE=1 SV=1//2.98933e-20 && PF00768:D-alanyl-D-alanine carboxypeptidase	0.781583	0.0292197	1.81003	1.00371e-08
CGTRNA_RS03410	cg0783	cg0783	698239	699468	1230	-//- && -	-0.770605	0.00215042	-0.67053	0.0328397
CGTRNA_RS03420	cg0785	cg0785	700392	700745	354	-//- && -	3.67191	0.0167554	4.18666	0.00279823
CGTRNA_RS03425	cg0786	upp	700754	701389	636	sp|P58998|UPP_CORGL Uracil phosphoribosyltransferase OS=Corynebacterium glutamicum (strain ATCC 13032 / DSM 20300 / JCM 1318 / LMG 3730 / NCIMB 10025) GN=upp PE=3 SV=1//5.63337e-150 && PF14681:Uracil phosphoribosyltransferase	-0.847245	0.000509941	-0.986308	0.00120472
CGTRNA_RS03480	cg0797	prpB1	715704	716621	918	sp|Q8NSH8|PRPB1_CORGL Probable 2-methylisocitrate lyase 1 OS=Corynebacterium glutamicum (strain ATCC 13032 / DSM 20300 / JCM 1318 / LMG 3730 / NCIMB 10025) GN=prpB1 PE=3 SV=1//0 && PF13714:Phosphoenolpyruvate phosphomutase	1.64245	0.00247812	1.09258	0.00702144
CGTRNA_RS03505	cg0802	accBC	720050	721825	1776	sp|P46392|BCCA_MYCLE Acetyl-/propionyl-coenzyme A carboxylase alpha chain OS=Mycobacterium leprae (strain TN) GN=bccA PE=3 SV=2//0 && PF02785:Biotin carboxylase C-terminal domain|PF00364:Biotin-requiring enzyme|PF02786:Carbamoyl-phosphate synthase L chain, ATP binding domain|PF00289:Biotin carboxylase, N-terminal domain	-1.75362	1.74661e-22	-0.830333	0.0035681
CGTRNA_RS03510	cg0803	thtR	722017	722922	906	sp|P71121|THTR_CORGL Thiosulfate sulfurtransferase OS=Corynebacterium glutamicum (strain ATCC 13032 / DSM 20300 / JCM 1318 / LMG 3730 / NCIMB 10025) GN=thtR PE=3 SV=2//0 && PF00581:Rhodanese-like domain	-1.4938	4.75033e-16	-2.01379	1.46751e-20
CGTRNA_RS03520	cg0807	cg0807	724395	724811	417	-//- && PF11349:Protein of unknown function (DUF3151)	-0.69893	0.000590766	-1.45715	5.95661e-09
CGTRNA_RS03540	cg0811	dtsR2	728212	729825	1614	sp|P9WQH7|PCC5_MYCTU Probable propionyl-CoA carboxylase beta chain 5 OS=Mycobacterium tuberculosis (strain ATCC 25618 / H37Rv) GN=accD5 PE=1 SV=1//0 && PF01039:Carboxyl transferase domain	-0.951615	2.13577e-09	-0.845643	0.00270615
CGTRNA_RS03545	cg0812	dtsR1	730166	731797	1632	sp|P9WQH7|PCC5_MYCTU Probable propionyl-CoA carboxylase beta chain 5 OS=Mycobacterium tuberculosis (strain ATCC 25618 / H37Rv) GN=accD5 PE=1 SV=1//0 && PF01039:Carboxyl transferase domain	-4.10601	4.73799e-110	-2.32713	0.003911
CGTRNA_RS03570	cg0819	cg0819	736457	736816	360	-//- && -	-1.44192	0.000854297	-1.72883	0.000169136
CGTRNA_RS03575	cg0820	purE	736875	737372	498	sp|Q44679|PURE_CORAM N5-carboxyaminoimidazole ribonucleotide mutase OS=Corynebacterium ammoniagenes GN=purE PE=3 SV=1//6.68247e-76 && PF00731:AIR carboxylase	-1.14527	4.32973e-06	-1.21463	3.80483e-05
CGTRNA_RS03610	cg0828	cg0828	743288	743854	567	sp|P45862|YWJB_BACSU Uncharacterized protein YwjB OS=Bacillus subtilis (strain 168) GN=ywjB PE=4 SV=1//3.25153e-12 && PF01872:RibD C-terminal domain	1.18422	5.74283e-06	-0.798921	0.0320268
CGTRNA_RS03660	cg0839	cg0839	755167	758868	3702	-//- && -	-2.42255	3.67232e-44	-0.682412	0.0172304
CGTRNA_RS03670	cg0841	cg0841	759834	762269	2436	-//- && PF07510:Protein of unknown function (DUF1524)|PF03235:Protein of unknown function DUF262	-1.41692	9.1872e-13	-0.924639	0.000222482
CGTRNA_RS03675	cg0842	cg0842	762376	764676	2301	sp|Q6GFF2|PCRA_STAAR ATP-dependent DNA helicase PcrA OS=Staphylococcus aureus (strain MRSA252) GN=pcrA PE=3 SV=1//1.65683e-06 && PF13361:UvrD-like helicase C-terminal domain|PF13245:AAA domain	-2.55306	7.81655e-39	-0.832453	0.00115437
CGTRNA_RS03680	cg0843	cg0843	764707	771009	6303	sp|O13983|HRQ1_SCHPO Putative ATP-dependent helicase hrq1 OS=Schizosaccharomyces pombe (strain 972 / ATCC 24843) GN=hrq1 PE=3 SV=4//1.37831e-07 && PF09369:Domain of unknown function (DUF1998)|PF00271:Helicase conserved C-terminal domain|PF00270:DEAD/DEAH box helicase	-3.58984	4.18096e-65	-0.929125	0.000165811
CGTRNA_RS03685	cg0844	cg0844	771017	775615	4599	-//- && -	-3.47675	1.54943e-71	-1.211	6.25078e-06
CGTRNA_RS03690	cg0845	cg0845	775620	778508	2889	sp|P54509|YQHH_BACSU Uncharacterized ATP-dependent helicase YqhH OS=Bacillus subtilis (strain 168) GN=yqhH PE=3 SV=1//6.78363e-35 && PF00271:Helicase conserved C-terminal domain|PF04851:Type III restriction enzyme, res subunit	-2.13022	4.83915e-36	-2.1587	3.32349e-15
CGTRNA_RS03715	cg0852	cg0852	783632	784090	459	-//- && -	-1.57113	1.31095e-10	-0.923562	0.00188277
CGTRNA_RS03730	cg0855	cg0855	786108	787115	1008	-//- && -	0.472178	0.0468355	0.907944	0.000254923
CGTRNA_RS03740	cg0858	cg0858	788640	789425	786	-//- && -	-5.14421	3.62584e-137	-1.89008	8.26551e-14
CGTRNA_RS03745	cg0859	cg0859	789669	790022	354	-//- && -	0.447363	0.0244812	-0.576598	0.0402398
CGTRNA_RS03750	cg0860	sahH	790133	791569	1437	sp|A4QC87|SAHH_CORGB Adenosylhomocysteinase OS=Corynebacterium glutamicum (strain R) GN=ahcY PE=3 SV=1//0 && PF00670:S-adenosyl-L-homocysteine hydrolase, NAD binding domain|PF05221:S-adenosyl-L-homocysteine hydrolase	0.913117	7.37444e-08	1.03842	1.75608e-06
CGTRNA_RS03755	cg0861	tmk	791569	792180	612	sp|P9WKE1|KTHY_MYCTU Thymidylate kinase OS=Mycobacterium tuberculosis (strain ATCC 25618 / H37Rv) GN=tmk PE=1 SV=1//1.13469e-61 && PF02223:Thymidylate kinase	0.861482	2.5081e-05	1.56478	4.1295e-12
CGTRNA_RS03765	cg0864	mtrB	792949	794484	1536	sp|A0QTK3|MTRB_MYCS2 Sensor histidine kinase MtrB OS=Mycobacterium smegmatis (strain ATCC 700084 / mc(2)155) GN=mtrB PE=3 SV=2//8.67328e-153 && PF00512:His Kinase A (phospho-acceptor) domain|PF00672:HAMP domain|PF02518:Histidine kinase-, DNA gyrase B-, and HSP90-like ATPase	-0.477104	0.0443441	0.997299	9.68043e-05
CGTRNA_RS03770	cg0865	cg0865	794481	796187	1707	sp|Q8NSC0|LPQB_CORGL Lipoprotein LpqB OS=Corynebacterium glutamicum (strain ATCC 13032 / DSM 20300 / JCM 1318 / LMG 3730 / NCIMB 10025) GN=lpqB PE=3 SV=1//0 && PF10647:Lipoprotein LpqB beta-propeller domain	-0.852841	0.000403504	1.99131	5.10406e-14
CGTRNA_RS03790	cg0869	cg0869	800257	800640	384	-//- && -	2.22432	1.77703e-06	1.30256	0.0192067
CGTRNA_RS03795	cg0870	cg0870	800757	801167	411	-//- && PF00702:haloacid dehalogenase-like hydrolase	0.507346	0.0148214	-1.05871	0.000186097
CGTRNA_RS03805	cg0872	cg0872	801678	802667	990	sp|B6YS07|RSGA_AZOPC Putative ribosome biogenesis GTPase RsgA OS=Azobacteroides pseudotrichonymphae genomovar. CFP2 GN=rsgA PE=3 SV=1//2.65443e-22 && PF03193:RsgA GTPase	-0.984185	1.23724e-06	1.2597	6.07797e-07
CGTRNA_RS03825	cg0876	sigH	805881	806501	621	sp|P9WGH9|SIGH_MYCTU ECF RNA polymerase sigma factor SigH OS=Mycobacterium tuberculosis (strain ATCC 25618 / H37Rv) GN=sigH PE=1 SV=1//9.42525e-91 && PF08281:Sigma-70, region 4|PF04542:Sigma-70 region 2	0.52435	0.0185042	-0.615797	0.0260758
CGTRNA_RS03850	cg0881	rhlE	809416	810690	1275	sp|P0A4D8|CSHA_STRR6 DEAD-box ATP-dependent RNA helicase CshA OS=Streptococcus pneumoniae (strain ATCC BAA-255 / R6) GN=cshA PE=3 SV=1//1.15869e-96 && PF00270:DEAD/DEAH box helicase|PF00271:Helicase conserved C-terminal domain	-0.55982	0.0199924	-0.865101	0.00247353
CGTRNA_RS03855	cg0882	cg0882	810759	810986	228	-//- && PF11305:Protein of unknown function (DUF3107)	-1.08743	1.35945e-07	-2.5707	9.93316e-24
CGTRNA_RS03870	cg0885	cg0885	812643	815693	3051	sp|D1KF50|SRS2L_ARATH ATP-dependent DNA helicase SRS2-like protein At4g25120 OS=Arabidopsis thaliana GN=SRS2 PE=1 SV=1//1.35201e-06 && PF13361:UvrD-like helicase C-terminal domain|PF00580:UvrD/REP helicase N-terminal domain|PF12705:PD-(D/E)XK nuclease superfamily	-1.78411	5.99507e-16	1.547	7.01132e-08
CGTRNA_RS03875	cg0886	cg0886	815686	818898	3213	sp|Q9CD72|UVRD1_MYCLE ATP-dependent DNA helicase UvrD1 OS=Mycobacterium leprae (strain TN) GN=uvrD PE=3 SV=1//1.38749e-24 && PF13361:UvrD-like helicase C-terminal domain|PF00580:UvrD/REP helicase N-terminal domain|PF12705:PD-(D/E)XK nuclease superfamily	-2.4039	1.8304e-28	1.4644	1.59172e-06
CGTRNA_RS03880	cg0887	cg0887	818938	819999	1062	sp|Q57604|MJK1_METJA Potassium channel protein 1 OS=Methanocaldococcus jannaschii (strain ATCC 43067 / DSM 2661 / JAL-1 / JCM 10045 / NBRC 100440) GN=MJ0138.1 PE=3 SV=1//5.51214e-20 && PF07885:Ion channel|PF02254:TrkA-N domain	-0.874965	0.000146015	1.22869	3.32897e-05
CGTRNA_RS03885	cg0888	cg0888	819996	820712	717	sp|C1AGW8|NUDC_MYCBT NADH pyrophosphatase OS=Mycobacterium bovis (strain BCG / Tokyo 172 / ATCC 35737 / TMC 1019) GN=nudC PE=3 SV=1//1.39514e-18 && PF00293:NUDIX domain	-0.920534	3.14426e-05	1.16809	5.72593e-05
CGTRNA_RS03890	cg0889	cg0889	820727	822763	2037	sp|P9WMP9|UVRD2_MYCTU ATP-dependent DNA helicase UvrD2 OS=Mycobacterium tuberculosis (strain ATCC 25618 / H37Rv) GN=uvrD2 PE=1 SV=1//0 && PF13361:UvrD-like helicase C-terminal domain|PF00570:HRDC domain|PF13245:AAA domain	-0.986507	6.93473e-06	1.78915	3.11675e-10
CGTRNA_RS03910	cg0893	cg0893	825663	826715	1053	sp|O34470|YLBL_BACSU Uncharacterized protein YlbL OS=Bacillus subtilis (strain 168) GN=ylbL PE=1 SV=2//1.1896e-40 && PF13180:PDZ domain|PF05362:Lon protease (S16) C-terminal proteolytic domain	1.55223	1.27817e-10	0.751087	0.0189881
CGTRNA_RS03925	cg0896	cg0896	828089	831046	2958	sp|Q8NS93|Y786_CORGL UPF0182 protein Cgl0786/cg0896 OS=Corynebacterium glutamicum (strain ATCC 13032 / DSM 20300 / JCM 1318 / LMG 3730 / NCIMB 10025) GN=Cgl0786 PE=3 SV=1//0 && PF03699:Uncharacterised protein family (UPF0182)	-1.28084	1.59006e-15	0.994359	2.85184e-06
CGTRNA_RS03930	cg0897	pdxR	831097	832458	1362	sp|Q8NS92|PDXR_CORGL HTH-type pyridoxine biosynthesis transcriptional regulator PdxR OS=Corynebacterium glutamicum (strain ATCC 13032 / DSM 20300 / JCM 1318 / LMG 3730 / NCIMB 10025) GN=pdxR PE=3 SV=1//0 && PF00392:Bacterial regulatory proteins, gntR family	1.60589	0.000658205	2.22387	5.83571e-07
CGTRNA_RS03935	cg0898	cg0898	832548	833447	900	sp|P82134|PDXS_CORGL Pyridoxal 5&apos;-phosphate synthase subunit PdxS OS=Corynebacterium glutamicum (strain ATCC 13032 / DSM 20300 / JCM 1318 / LMG 3730 / NCIMB 10025) GN=pdxS PE=1 SV=2//0 && PF01680:SOR/SNZ family	-1.73761	2.03716e-06	0.803993	0.00227656
CGTRNA_RS03940	cg0899	cg0899	833444	834046	603	sp|Q8NS90|PDXT_CORGL Pyridoxal 5&apos;-phosphate synthase subunit PdxT OS=Corynebacterium glutamicum (strain ATCC 13032 / DSM 20300 / JCM 1318 / LMG 3730 / NCIMB 10025) GN=pdxT PE=3 SV=1//4.02204e-142 && PF01174:SNO glutamine amidotransferase family	-1.68164	7.71691e-09	1.58768	3.18523e-11
CGTRNA_RS03955	cg0901	cg0901	835045	836109	1065	-//- && -	-1.30492	1.86181e-08	-2.01411	1.9188e-12
CGTRNA_RS03970	cg0905	psp2	838785	840368	1584	sp|P0C1D6|CSP1_CORGL Protein PS1 OS=Corynebacterium glutamicum (strain ATCC 13032 / DSM 20300 / JCM 1318 / LMG 3730 / NCIMB 10025) GN=csp1 PE=3 SV=1//4.02671e-12 && PF08310:LGFP repeat	-1.65185	0.000152484	-1.83791	0.000144763
CGTRNA_RS03985	cg0908	cg0908	841103	841615	513	-//- && -	2.87467	3.56743e-11	1.17323	0.0128405
CGTRNA_RS04015	cg0913	prfB	844730	845836	1107	sp|Q8NS78|RF2_CORGL Peptide chain release factor 2 OS=Corynebacterium glutamicum (strain ATCC 13032 / DSM 20300 / JCM 1318 / LMG 3730 / NCIMB 10025) GN=prfB PE=3 SV=1//0 && PF03462:PCRF domain|PF00472:RF-1 domain	-1.07425	1.38818e-07	-1.1497	9.91044e-06
CGTRNA_RS04025	cg0915	ftsX	846671	847573	903	sp|P9WG19|FTSX_MYCTU Cell division protein FtsX OS=Mycobacterium tuberculosis (strain ATCC 25618 / H37Rv) GN=ftsX PE=1 SV=1//9.79879e-56 && -	0.992484	0.00028784	1.26251	4.09704e-06
CGTRNA_RS04030	cg0916	smpB	847610	848104	495	sp|Q8NS75|SSRP_CORGL SsrA-binding protein OS=Corynebacterium glutamicum (strain ATCC 13032 / DSM 20300 / JCM 1318 / LMG 3730 / NCIMB 10025) GN=smpB PE=3 SV=1//1.68969e-104 && PF01668:SmpB protein	-1.25512	2.57864e-08	-0.85953	0.00119369
CGTRNA_RS04060	cg0923	cg0923	851879	852469	591	-//- && PF07884:Vitamin K epoxide reductase family	-1.58539	1.2187e-06	-2.2945	6.43784e-14
CGTRNA_RS04065	cg0924	cg0924	852821	853837	1017	sp|P11460|FATB_VIBA7 Ferric anguibactin-binding protein OS=Vibrio anguillarum (strain ATCC 68554 / 775) GN=fatB PE=3 SV=1//1.3868e-19 && PF01497:Periplasmic binding protein	1.98639	0.0227116	2.75694	0.000289946
CGTRNA_RS04075	cg0927	cg0927	855082	856197	1116	sp|P94419|YCLO_BACSU Uncharacterized ABC transporter permease protein YclO OS=Bacillus subtilis (strain 168) GN=yclO PE=3 SV=1//2.52121e-45 && PF01032:FecCD transport family	1.23986	0.0120862	3.87851	1.48489e-28
CGTRNA_RS04080	cg0928	cg0928	856194	856949	756	sp|P94420|YCLP_BACSU Uncharacterized ABC transporter ATP-binding protein YclP OS=Bacillus subtilis (strain 168) GN=yclP PE=3 SV=1//2.95595e-86 && PF00005:ABC transporter	1.21114	0.0386155	3.99668	1.11532e-25
CGTRNA_RS04120	cg0935	cg0935	868854	869045	192	-//- && -	-1.42609	1.66744e-05	-2.19985	8.02811e-08
CGTRNA_RS04125	cg0936	cg0936	869271	869852	582	sp|Q6M6W5|RPF1_CORGL Resuscitation-promoting factor Rpf1 OS=Corynebacterium glutamicum (strain ATCC 13032 / DSM 20300 / JCM 1318 / LMG 3730 / NCIMB 10025) GN=rpf1 PE=3 SV=1//2.50284e-97 && PF06737:Transglycosylase-like domain|PF11574:Protein of unknown function (DUF3235)	-2.66208	2.9688e-32	-1.08959	1.66269e-06
CGTRNA_RS04135	cg0939	cg0939	870847	871374	528	-//- && PF10969:Protein of unknown function (DUF2771)	-1.79099	3.03829e-13	-1.44438	3.33823e-07
CGTRNA_RS04155	cg0945	cg0945	874684	875514	831	sp|P59968|Y905_MYCBO Uncharacterized tRNA/rRNA methyltransferase Mb0905 OS=Mycobacterium bovis (strain ATCC BAA-935 / AF2122/97) GN=Mb0905 PE=3 SV=1//6.12822e-97 && PF00588:SpoU rRNA Methylase family	-0.811085	0.00932497	3.01221	2.08474e-24
CGTRNA_RS04170	cg0948	serC	877453	878583	1131	sp|A4QCG9|SERC_CORGB Phosphoserine aminotransferase OS=Corynebacterium glutamicum (strain R) GN=serC PE=3 SV=1//0 && PF00266:Aminotransferase class-V	-2.16168	7.60081e-41	-1.63204	3.95047e-11
CGTRNA_RS04175	cg0949	gltA	879309	880622	1314	sp|P42457|CISY_CORGL Citrate synthase OS=Corynebacterium glutamicum (strain ATCC 13032 / DSM 20300 / JCM 1318 / LMG 3730 / NCIMB 10025) GN=gltA PE=3 SV=1//0 && PF00285:Citrate synthase, C-terminal domain	0.521329	0.0185206	-0.804919	0.00106854
CGTRNA_RS04185	cg0951	accDA	881110	882564	1455	sp|P9WQH9|ACCD_MYCTU Putative acetyl-coenzyme A carboxylase carboxyl transferase subunit beta OS=Mycobacterium tuberculosis (strain ATCC 25618 / H37Rv) GN=accD3 PE=1 SV=1//2.22436e-107 && PF01039:Carboxyl transferase domain	0.864797	4.52403e-05	0.867949	0.000146759
CGTRNA_RS04195	cg0953	cg0953	883466	885121	1656	sp|P39599|YWCA_BACSU Uncharacterized symporter YwcA OS=Bacillus subtilis (strain 168) GN=ywcA PE=3 SV=2//1.1758e-101 && PF00474:Sodium:solute symporter family	1.1524	0.00377625	-0.990537	3.1562e-05
CGTRNA_RS04215	cg0958	cg0958	896174	896665	492	-//- && PF13845:Septum formation	-1.63164	3.5745e-11	-2.03548	6.53018e-12
CGTRNA_RS04225	cg0961	cg0961	897064	898113	1050	sp|Q47L17|METX_THEFY Homoserine O-acetyltransferase OS=Thermobifida fusca (strain YX) GN=metX PE=3 SV=1//1.79159e-33 && PF00561:alpha/beta hydrolase fold	2.61843	0.00862927	-1.17362	0.00156006
CGTRNA_RS04230	cg0962	cg0962	898187	898615	429	-//- && -	0.988872	0.0399308	-1.45874	0.0431184
CGTRNA_RS04240	cg0963	cg0963	898894	899163	270	-//- && -	-1.47436	1.30936e-19	-2.07834	4.13293e-21
CGTRNA_RS04255	cg0966	thyA	899902	900702	801	sp|Q8NS38|TYSY_CORGL Thymidylate synthase OS=Corynebacterium glutamicum (strain ATCC 13032 / DSM 20300 / JCM 1318 / LMG 3730 / NCIMB 10025) GN=thyA PE=1 SV=1//0 && PF00303:Thymidylate synthase	-0.804415	1.54023e-05	-0.518256	0.0282949
CGTRNA_RS04260	cg0967	cysQ	900721	901479	759	sp|P46726|CYSQ_MYCLE 3&apos;-phosphoadenosine 5&apos;-phosphate phosphatase OS=Mycobacterium leprae (strain TN) GN=cysQ PE=3 SV=2//1.1497e-66 && PF00459:Inositol monophosphatase family	-1.77341	1.06451e-18	-1.58146	4.19809e-12
CGTRNA_RS04265	cg0968	cg0968	901514	906076	4563	sp|P30015|LHR_ECOLI Probable ATP-dependent helicase lhr OS=Escherichia coli (strain K12) GN=lhr PE=3 SV=2//0 && PF00270:DEAD/DEAH box helicase|PF08494:DEAD/H associated|PF00271:Helicase conserved C-terminal domain	-1.3568	1.00505e-11	1.31434	3.28588e-07
CGTRNA_RS04285	cg0972	cg0972	908027	909202	1176	sp|P37482|YYCB_BACSU Uncharacterized transporter YycB OS=Bacillus subtilis (strain 168) GN=yycB PE=2 SV=1//1.19926e-29 && PF07690:Major Facilitator Superfamily	-0.957232	1.649e-05	-1.87149	1.94783e-12
CGTRNA_RS04290	cg0973	pgi	909227	910849	1623	sp|Q8NS31|G6PI_CORGL Glucose-6-phosphate isomerase OS=Corynebacterium glutamicum (strain ATCC 13032 / DSM 20300 / JCM 1318 / LMG 3730 / NCIMB 10025) GN=pgi PE=3 SV=1//0 && PF00342:Phosphoglucose isomerase	-1.70835	1.74778e-22	-1.44165	5.81011e-11
CGTRNA_RS04300	cg0975	cg0975	912323	912628	306	sp|P64768|Y973_MYCBO Uncharacterized protein Mb0973c OS=Mycobacterium bovis (strain ATCC BAA-935 / AF2122/97) GN=Mb0973c PE=3 SV=1//1.35288e-17 && PF01817:Chorismate mutase type II	-0.930006	1.77174e-06	-1.97081	5.67546e-15
CGTRNA_RS04310	cg0977	cg0977	914945	917170	2226	-//- && -	1.05602	0.000503934	0.852903	0.015565
CGTRNA_RS04325	cg0980	cg0980	918438	919151	714	sp|P0ADA4|NLPD_SHIFL Murein hydrolase activator NlpD OS=Shigella flexneri GN=nlpD PE=3 SV=1//3.10777e-17 && PF01551:Peptidase family M23	-4.95657	1.26111e-130	-1.11274	2.49635e-05
CGTRNA_RS04330	cg0982	cg0982	919507	920826	1320	sp|P64772|Y980_MYCBO Uncharacterized protein Mb0980 OS=Mycobacterium bovis (strain ATCC BAA-935 / AF2122/97) GN=Mb0980 PE=4 SV=1//1.44762e-09 && -	-0.996727	0.000258453	1.77454	1.14646e-10
CGTRNA_RS04335	cg0983	purN	920801	921430	630	sp|P9WHM5|PUR3_MYCTU Phosphoribosylglycinamide formyltransferase OS=Mycobacterium tuberculosis (strain ATCC 25618 / H37Rv) GN=purN PE=1 SV=1//1.17346e-57 && PF00551:Formyl transferase	-1.03977	5.64304e-06	1.26154	1.16202e-07
CGTRNA_RS04355	cg0987	cg0987	924605	925459	855	-//- && -	-1.29569	6.65543e-10	-0.965562	0.000163745
CGTRNA_RS04390	cg0994	rpmE	928944	929210	267	sp|Q8NS12|RL31B_CORGL 50S ribosomal protein L31 type B OS=Corynebacterium glutamicum (strain ATCC 13032 / DSM 20300 / JCM 1318 / LMG 3730 / NCIMB 10025) GN=rpmE2 PE=3 SV=1//1.74354e-61 && PF01197:Ribosomal protein L31	-0.778068	1.01997e-05	-1.30287	7.07496e-06
CGTRNA_RS04395	cg0995	rpmF	929222	929395	174	sp|Q8NS11|RL32_CORGL 50S ribosomal protein L32 OS=Corynebacterium glutamicum (strain ATCC 13032 / DSM 20300 / JCM 1318 / LMG 3730 / NCIMB 10025) GN=rpmF PE=3 SV=1//1.15343e-23 && PF01783:Ribosomal L32p protein family	-0.7827	0.00377625	-0.661933	0.0447653
CGTRNA_RS04410	cg0998	cg0998	931796	933121	1326	sp|Q9PL97|DEGPL_CHLMU Probable periplasmic serine endoprotease DegP-like OS=Chlamydia muridarum (strain MoPn / Nigg) GN=htrA PE=3 SV=1//1.48859e-46 && PF13180:PDZ domain|PF13365:Trypsin-like peptidase domain	1.31879	3.32975e-06	-0.601398	0.0163605
CGTRNA_RS04425	cg1002	cg1002	934526	935080	555	-//- && PF08666:SAF domain	0.607462	0.0464381	-0.958474	0.0192128
CGTRNA_RS04430	cg1003	cg1003	935199	935771	573	sp|A0R3H2|5FCL_MYCS2 5-formyltetrahydrofolate cyclo-ligase OS=Mycobacterium smegmatis (strain ATCC 700084 / mc(2)155) GN=MSMEG_5472 PE=1 SV=1//2.56974e-26 && PF01812:5-formyltetrahydrofolate cyclo-ligase family	-1.79816	4.9421e-21	-2.08881	6.46277e-16
CGTRNA_RS04445	cg1006	cg1006	938084	938746	663	sp|O31633|YJCK_BACSU Putative ribosomal-protein-alanine acetyltransferase OS=Bacillus subtilis (strain 168) GN=yjcK PE=3 SV=1//2.67139e-20 && PF13302:Acetyltransferase (GNAT) domain	0.913635	0.000527365	0.815427	0.0045707
CGTRNA_RS04485	cg1016	betP	946465	948252	1788	sp|P54582|BETP_CORGL Glycine betaine transporter BetP OS=Corynebacterium glutamicum (strain ATCC 13032 / DSM 20300 / JCM 1318 / LMG 3730 / NCIMB 10025) GN=betP PE=1 SV=1//0 && PF02028:BCCT, betaine/carnitine/choline family transporter	-1.17465	1.24814e-13	0.641648	0.00361385
CGTRNA_RS04565	cg1037	cg1037	965283	966407	1125	sp|Q6M6N7|RPF2_CORGL Resuscitation-promoting factor Rpf2 OS=Corynebacterium glutamicum (strain ATCC 13032 / DSM 20300 / JCM 1318 / LMG 3730 / NCIMB 10025) GN=rpf2 PE=1 SV=1//0 && PF03990:Domain of unknown function (DUF348)|PF06737:Transglycosylase-like domain|PF07501:G5 domain	-4.61159	5.4278e-104	-1.13849	2.49334e-07
CGTRNA_RS04585	cg1041	pdxK	970137	970931	795	sp|P40191|PDXK_ECOLI Pyridoxine kinase OS=Escherichia coli (strain K12) GN=pdxK PE=1 SV=2//5.21571e-47 && PF08543:Phosphomethylpyrimidine kinase	0.878164	0.00195291	1.34088	3.43151e-06
CGTRNA_RS04590	cg1043	cg1043	970928	971410	483	sp|Q81SZ9|RESA_BACAN Thiol-disulfide oxidoreductase ResA OS=Bacillus anthracis GN=resA PE=1 SV=1//2.62608e-07 && PF00578:AhpC/TSA family	3.04022	7.12457e-24	1.03935	0.00513773
CGTRNA_RS04600	cg1045	cg1045	971888	972211	324	-//- && PF03992:Antibiotic biosynthesis monooxygenase	-1.3678	9.69314e-16	-2.25197	3.66887e-24
CGTRNA_RS04605	cg1046	pvdS1	972334	973296	963	sp|Q04605|YUF2_LEPBY Uncharacterized protein in chlN 3&apos;region (Fragment) OS=Leptolyngbya boryana PE=4 SV=1//2.87923e-13 && PF03976:Polyphosphate kinase 2 (PPK2)	-1.35528	6.5082e-17	-1.90813	9.15629e-19
CGTRNA_RS04620	cg1050	cg1050	975713	976435	723	-//- && -	1.24206	1.25747e-05	1.67496	1.62778e-12
CGTRNA_RS04630	cg1052	cmt3	977756	979207	1452	sp|P0C1D7|CSP1_CORML Protein PS1 OS=Corynebacterium melassecola GN=csp1 PE=4 SV=1//1.56694e-25 && PF00756:Putative esterase	2.92029	0.0119257	3.32696	0.00318604
CGTRNA_RS04640	cg1054	mmpL2	979835	982210	2376	sp|P96687|YDFJ_BACSU Membrane protein YdfJ OS=Bacillus subtilis (strain 168) GN=ydfJ PE=2 SV=1//2.58506e-90 && PF03176:MMPL family	2.72122	2.34325e-06	2.76255	3.35138e-06
CGTRNA_RS04645	cg1055	menG	982457	982963	507	sp|Q8NRW6|RRAAH_CORGL Putative 4-hydroxy-4-methyl-2-oxoglutarate aldolase OS=Corynebacterium glutamicum (strain ATCC 13032 / DSM 20300 / JCM 1318 / LMG 3730 / NCIMB 10025) GN=Cgl0925 PE=3 SV=1//3.89556e-118 && PF03737:Aldolase/RraA	1.10715	2.5914e-05	-1.26938	8.54225e-05
CGTRNA_RS04650	cg1056	cg1056	983128	983760	633	-//- && -	0.82669	0.00197641	-1.03709	0.00327599
CGTRNA_RS04745	cg1080	cg1080	1002796	1004337	1542	sp|Q4LAB0|MCO_STAHJ Multicopper oxidase mco OS=Staphylococcus haemolyticus (strain JCSC1435) GN=mco PE=3 SV=2//6.33826e-74 && PF07731:Multicopper oxidase|PF07732:Multicopper oxidase	-2.2281	9.30101e-14	-1.24597	8.41684e-09
CGTRNA_RS04750	cg1081	cg1081	1004483	1005403	921	sp|Q1BWI2|NODI_BURCA Nod factor export ATP-binding protein I OS=Burkholderia cenocepacia (strain AU 1054) GN=nodI PE=3 SV=1//2.03715e-50 && PF00005:ABC transporter	-2.23605	1.71095e-26	-1.08335	5.3536e-06
CGTRNA_RS04755	cg1082	cg1082	1005423	1006256	834	-//- && PF12698:ABC-2 family transporter protein	-2.20936	2.09922e-25	-1.13032	1.51459e-06
CGTRNA_RS04785	cg1089	cg1089	1011527	1013263	1737	sp|Q2YU20|Y1799_STAAB Putative multidrug export ATP-binding/permease protein SAB1799c OS=Staphylococcus aureus (strain bovine RF122 / ET3-1) GN=SAB1799c PE=3 SV=1//1.94999e-58 && PF00005:ABC transporter|PF00664:ABC transporter transmembrane region	1.86844	0.000391848	2.87707	6.27312e-11
CGTRNA_RS04795	cg1091	cg1091	1015486	1015737	252	-//- && -	-0.679356	0.0370386	-0.902063	5.66758e-05
CGTRNA_RS04800	cg1092	cg1092	1015810	1016235	426	-//- && PF05901:Excalibur calcium-binding domain	-2.48842	2.26079e-21	-3.60471	1.54986e-27
CGTRNA_RS04815	cg1097	cg1097	1018741	1019340	600	-//- && -	1.26125	0.00594503	-1.49224	0.0203505
CGTRNA_RS04830	cg1099	mfd	1020545	1024189	3645	sp|P9WMQ5|MFD_MYCTU Transcription-repair-coupling factor OS=Mycobacterium tuberculosis (strain ATCC 25618 / H37Rv) GN=mfd PE=1 SV=1//0 && PF02559:CarD-like/TRCF domain|PF00271:Helicase conserved C-terminal domain|PF03461:TRCF domain|PF00270:DEAD/DEAH box helicase	-1.27651	1.85552e-11	1.70493	4.67176e-15
CGTRNA_RS04840	cg1101	cg1101	1026133	1027866	1734	sp|P9WQJ0|Y1273_MYCTO Uncharacterized ABC transporter ATP-binding protein MT1311 OS=Mycobacterium tuberculosis (strain CDC 1551 / Oshkosh) GN=MT1311 PE=3 SV=1//0 && PF00664:ABC transporter transmembrane region|PF00005:ABC transporter	-0.724367	0.00304519	-0.837597	0.00360841
CGTRNA_RS04850	cg1104	cg1104	1030473	1031753	1281	sp|P35866|Y967_CORGL Uncharacterized protein Cgl0967/cg1104 OS=Corynebacterium glutamicum (strain ATCC 13032 / DSM 20300 / JCM 1318 / LMG 3730 / NCIMB 10025) GN=Cgl0967 PE=4 SV=1//0 && PF00756:Putative esterase	-0.924191	0.00151272	-1.21244	0.000326133
CGTRNA_RS04875	cg1109	porB	1034736	1035116	381	-//- && PF11565:Alpha helical Porin B	2.23112	1.67223e-25	-2.54046	4.84136e-16
CGTRNA_RS04880	cg1110	cg1110	1035448	1036212	765	-//- && PF13406:Transglycosylase SLT domain	2.24692	1.57716e-15	-1.39517	0.00636029
CGTRNA_RS04885	cg1111	eno	1036419	1037696	1278	sp|Q8NRS1|ENO_CORGL Enolase OS=Corynebacterium glutamicum (strain ATCC 13032 / DSM 20300 / JCM 1318 / LMG 3730 / NCIMB 10025) GN=eno PE=3 SV=1//0 && PF00113:Enolase, C-terminal TIM barrel domain|PF03952:Enolase, N-terminal domain	-1.33013	3.54634e-15	-1.5929	5.74774e-14
CGTRNA_RS04930	cg1120	cg1120	1042395	1043390	996	sp|Q8NRR3|RIPA_CORGL HTH-type transcriptional regulator RipA OS=Corynebacterium glutamicum (strain ATCC 13032 / DSM 20300 / JCM 1318 / LMG 3730 / NCIMB 10025) GN=ripA PE=2 SV=1//0 && PF12833:Helix-turn-helix domain	2.05258	0.00250045	2.63969	1.51712e-05
CGTRNA_RS04935	cg1121	cg1121	1043497	1044315	819	-//- && PF12811:Bax inhibitor 1 like	-0.868084	6.53931e-06	-0.529287	0.0331129
CGTRNA_RS04945	cg1123	greA	1045241	1045765	525	sp|C1A2Y4|GREA_RHOE4 Transcription elongation factor GreA OS=Rhodococcus erythropolis (strain PR4 / NBRC 100887) GN=greA PE=3 SV=1//5.00255e-58 && PF03449:Transcription elongation factor, N-terminal|PF01272:Transcription elongation factor, GreA/GreB, C-term	1.15421	5.53677e-08	-0.656075	0.0230894
CGTRNA_RS04950	cg1125	cg1125	1045944	1046429	486	-//- && PF14155:Domain of unknown function (DUF4307)	-1.05684	5.62826e-05	-0.931599	0.00139799
CGTRNA_RS04955	cg1127	cg1127	1046628	1047503	876	sp|A0R2W9|MCA_MYCS2 Mycothiol S-conjugate amidase OS=Mycobacterium smegmatis (strain ATCC 700084 / mc(2)155) GN=mca PE=1 SV=1//9.80315e-119 && PF02585:GlcNAc-PI de-N-acetylase	1.53515	4.24749e-14	-1.02301	0.000103791
CGTRNA_RS04965	cg1129	aroF	1048080	1049180	1101	sp|P35170|AROG_CORGL Phospho-2-dehydro-3-deoxyheptonate aldolase OS=Corynebacterium glutamicum (strain ATCC 13032 / DSM 20300 / JCM 1318 / LMG 3730 / NCIMB 10025) GN=aroG PE=3 SV=2//0 && PF00793:DAHP synthetase I family	2.70787	1.61215e-12	0.73434	0.0257584
CGTRNA_RS04990	cg1134	pabAB	1053491	1055353	1863	sp|P32483|PABS_STRGR Para-aminobenzoate synthase OS=Streptomyces griseus GN=pab PE=3 SV=1//0 && PF00425:chorismate binding enzyme|PF00117:Glutamine amidotransferase class-I	-2.14167	2.95633e-10	1.51327	8.84005e-11
CGTRNA_RS04995	cg1135	cg1135	1055350	1056075	726	-//- && PF01063:Amino-transferase class IV	-0.778651	0.0464641	2.54507	2.09356e-19
CGTRNA_RS05010	cg1138	cg1138	1057253	1057792	540	sp|P31668|PAT_ALCFA Phosphinothricin N-acetyltransferase OS=Alcaligenes faecalis GN=pat PE=3 SV=1//7.85258e-14 && PF00583:Acetyltransferase (GNAT) family	2.09872	1.48651e-33	-1.45663	1.64971e-07
CGTRNA_RS05030	cg1142	cg1142	1060090	1061400	1311	sp|P42964|YCSG_BACSU Uncharacterized membrane protein YcsG OS=Bacillus subtilis (strain 168) GN=ycsG PE=3 SV=4//5.04036e-82 && PF01566:Natural resistance-associated macrophage protein	2.21838	7.66292e-08	-1.03544	0.0417149
CGTRNA_RS05035	cg1143	cg1143	1061611	1062264	654	sp|P70790|YTUX_AGRVI Uncharacterized HTH-type transcriptional regulator in the TAR-I ttuE-ttuC&apos; intergenic region OS=Agrobacterium vitis PE=3 SV=1//3.15879e-11 && PF00392:Bacterial regulatory proteins, gntR family|PF07729:FCD domain	0.835843	0.0185042	-1.09479	0.0226053
CGTRNA_RS05070	cg1151	ssiE	1067579	1069042	1464	sp|E9JFX9|DMOA_HYPSL Dimethyl-sulfide monooxygenase OS=Hyphomicrobium sulfonivorans GN=dmoA PE=1 SV=1//1.71966e-166 && PF00296:Luciferase-like monooxygenase	3.52403	0.000786187	2.96808	0.0119853
CGTRNA_RS05075	cg1152	ssiF	1069039	1070121	1083	sp|A8XNF0|ACAD1_CAEBR Probable medium-chain specific acyl-CoA dehydrogenase 1, mitochondrial OS=Caenorhabditis briggsae GN=CBG15946 PE=3 SV=1//3.23473e-11 && PF02771:Acyl-CoA dehydrogenase, N-terminal domain	4.53012	0.0165356	5.67826	0.000913082
CGTRNA_RS05080	cg1153	ssiG	1070118	1071317	1200	sp|P54998|SOXC_RHOSG Dibenzothiophene desulfurization enzyme C OS=Rhodococcus sp. (strain IGTS8) GN=soxC PE=1 SV=1//8.04627e-26 && PF08028:Acyl-CoA dehydrogenase, C-terminal domain|PF02771:Acyl-CoA dehydrogenase, N-terminal domain	2.49194	0.00559869	2.74905	0.00153277
CGTRNA_RS05095	cg1157	glpX	1074145	1074717	573	-//- && PF14030:Protein of unknown function (DUF4245)	-0.71521	0.00344297	-1.26559	2.24869e-06
CGTRNA_RS05135	cg1158	cg1158	1082252	1082434	183	-//- && PF16951:Putative methionine and alanine importer, small subunit	-1.90854	2.29591e-08	-0.815798	0.0258288
CGTRNA_RS05140	cg1167	cg1167	1082438	1084129	1692	sp|P44849|Y736_HAEIN Uncharacterized sodium-dependent transporter HI_0736 OS=Haemophilus influenzae (strain ATCC 51907 / DSM 11121 / KW20 / Rd) GN=HI_0736 PE=3 SV=1//1.81397e-128 && PF00209:Sodium:neurotransmitter symporter family	-0.895055	5.62826e-05	-1.43368	4.5646e-11
CGTRNA_RS05165	cg1169	cg1169	1087565	1088389	825	sp|Q7NWJ6|OTC_CHRVO Ornithine carbamoyltransferase OS=Chromobacterium violaceum (strain ATCC 12472 / DSM 30191 / JCM 1249 / NBRC 12614 / NCIMB 9131 / NCTC 9757) GN=argF PE=3 SV=1//1.99761e-31 && PF02729:Aspartate/ornithine carbamoyltransferase, carbamoyl-P binding domain	0.732468	0.00136394	1.87912	6.39312e-11
CGTRNA_RS05195	cg1174	arcB	1096163	1096384	222	-//- && -	-1.51847	2.51767e-06	0.813568	0.0194968
CGTRNA_RS05250	cg1182	cg1182	1101429	1103126	1698	sp|P9WGF6|Y1739_MYCTO Probable sulfate transporter MT1781 OS=Mycobacterium tuberculosis (strain CDC 1551 / Oshkosh) GN=MT1781 PE=3 SV=1//8.29073e-159 && PF00916:Sulfate permease family|PF01740:STAS domain	-2.43593	3.11066e-30	-1.65587	7.166e-12
CGTRNA_RS05315	cg1209	phnA	1113358	1113702	345	sp|P0AFJ4|PHNA_SHIFL Protein PhnA OS=Shigella flexneri GN=phnA PE=4 SV=1//6.55049e-28 && PF08274:PhnA Zinc-Ribbon|PF03831:PhnA domain	-0.817345	0.00465658	-1.95018	3.90281e-06
CGTRNA_RS05340	cg1215	nadC	1118374	1119213	840	sp|P77938|NADC_RHORU Probable nicotinate-nucleotide pyrophosphorylase [carboxylating] OS=Rhodospirillum rubrum GN=nadC PE=3 SV=1//4.78726e-71 && PF01729:Quinolinate phosphoribosyl transferase, C-terminal domain|PF02749:Quinolinate phosphoribosyl transferase, N-terminal domain	-2.67018	1.57972e-37	-0.993487	0.00475754
CGTRNA_RS05345	cg1216	nadA	1119217	1120503	1287	sp|Q8NRI0|NADA_CORGL Quinolinate synthase A OS=Corynebacterium glutamicum (strain ATCC 13032 / DSM 20300 / JCM 1318 / LMG 3730 / NCIMB 10025) GN=nadA PE=3 SV=1//0 && PF02445:Quinolinate synthetase A protein	-2.68722	5.86139e-44	-1.75923	2.13524e-07
CGTRNA_RS05350	cg1218	cg1218	1120552	1121196	645	sp|Q58549|ADPP_METJA ADP-ribose pyrophosphatase OS=Methanocaldococcus jannaschii (strain ATCC 43067 / DSM 2661 / JAL-1 / JCM 10045 / NBRC 100440) GN=nudF PE=1 SV=1//6.47684e-15 && PF00293:NUDIX domain	-1.44682	2.03072e-09	-2.15048	4.91713e-21
CGTRNA_RS05360	cg1220	cg1220	1122299	1122901	603	sp|Q1WV48|Y324_LACS1 UPF0173 metal-dependent hydrolase LSL_0324 OS=Lactobacillus salivarius (strain UCC118) GN=LSL_0324 PE=3 SV=1//2.38681e-06 && PF13483:Beta-lactamase superfamily domain	-0.681877	0.0033287	-1.05619	0.000109766
CGTRNA_RS05395	cg1227	cg1227	1127875	1128480	606	sp|O34738|YKOE_BACSU Putative HMP/thiamine permease protein YkoE OS=Bacillus subtilis (strain 168) GN=ykoE PE=1 SV=2//5.02441e-14 && PF09819:ABC-type cobalt transport system, permease component	0.908491	0.00565255	-0.831955	0.0312167
CGTRNA_RS05435	cg1236	tpx	1136029	1136526	498	sp|Q8NRG3|TPX_CORGL Probable thiol peroxidase OS=Corynebacterium glutamicum (strain ATCC 13032 / DSM 20300 / JCM 1318 / LMG 3730 / NCIMB 10025) GN=tpx PE=3 SV=1//2.55644e-118 && PF08534:Redoxin	-0.635863	0.000200136	-1.04256	1.46578e-06
CGTRNA_RS05455	cg1240	cg1240	1140348	1140716	369	-//- && PF09981:Uncharacterized protein conserved in bacteria (DUF2218)	-0.789621	0.0344497	-0.868988	0.0128866
CGTRNA_RS05465	cg1242	cg1242	1141100	1141489	390	-//- && -	-0.494465	0.0336128	-1.30415	5.5266e-06
CGTRNA_RS05485	cg1246	cg1246	1143944	1144483	540	-//- && PF04167:Protein of unknown function (DUF402)	-0.601773	0.00913967	1.02145	9.34928e-05
CGTRNA_RS05515	cg1252	fdxC	1150421	1150738	318	sp|P13279|FER_STRGR Ferredoxin OS=Streptomyces griseus PE=1 SV=1//1.05274e-49 && PF00037:4Fe-4S binding domain	-1.24988	4.57241e-10	-0.689072	0.00552752
CGTRNA_RS05540	cg1257	aroP	1154760	1156151	1392	sp|Q46065|AROP_CORGL Aromatic amino acid transport protein AroP OS=Corynebacterium glutamicum (strain ATCC 13032 / DSM 20300 / JCM 1318 / LMG 3730 / NCIMB 10025) GN=aroP PE=3 SV=1//0 && PF00324:Amino acid permease	-0.565245	0.0187156	0.860653	0.000845593
CGTRNA_RS05570	cg1264	cg1264	1160735	1161043	309	-//- && -	0.664046	0.00907243	-0.802007	0.0177306
CGTRNA_RS05595	cg1269	glgC	1165158	1166387	1230	sp|A4QD83|GLGC_CORGB Glucose-1-phosphate adenylyltransferase OS=Corynebacterium glutamicum (strain R) GN=glgC PE=3 SV=1//0 && PF00483:Nucleotidyl transferase	-0.876788	9.79259e-08	-0.761159	0.000545576
CGTRNA_RS05610	cg1272	cg1272	1168044	1168538	495	sp|A0R2D3|RSEA_MYCS2 Anti-sigma-E factor RseA OS=Mycobacterium smegmatis (strain ATCC 700084 / mc(2)155) GN=rseA PE=1 SV=1//8.39384e-07 && -	0.487128	0.00534888	-1.2588	3.96068e-08
CGTRNA_RS05615	cg1273	cg1273	1168578	1169048	471	sp|Q8NRD0|TATB_CORGL Sec-independent protein translocase protein TatB OS=Corynebacterium glutamicum (strain ATCC 13032 / DSM 20300 / JCM 1318 / LMG 3730 / NCIMB 10025) GN=tatB PE=3 SV=1//2.05341e-81 && -	1.27846	6.4076e-10	-0.567979	0.0411691
CGTRNA_RS05620	cg1274	mrp	1169052	1170176	1125	sp|P9WJN7|MRP_MYCTU Protein mrp homolog OS=Mycobacterium tuberculosis (strain ATCC 25618 / H37Rv) GN=mrp PE=1 SV=1//1.96695e-134 && PF01883:Iron-sulfur cluster assembly protein|PF10609:NUBPL iron-transfer P-loop NTPase	-2.13536	1.15964e-35	-0.476002	0.0413884
CGTRNA_RS05645	cg1279	cg1279	1173334	1173867	534	-//- && -	-4.46345	1.80579e-58	-2.1209	2.20442e-20
CGTRNA_RS05650	cg1280	odhA	1173966	1177631	3666	sp|Q8NRC3|ODO12_CORGL 2-oxoglutarate dehydrogenase E1/E2 component OS=Corynebacterium glutamicum (strain ATCC 13032 / DSM 20300 / JCM 1318 / LMG 3730 / NCIMB 10025) GN=odhA PE=1 SV=2//0 && PF00676:Dehydrogenase E1 component|PF02779:Transketolase, pyrimidine binding domain|PF00198:2-oxoacid dehydrogenases acyltransferase (catalytic domain)|PF16870:2-oxoglutarate dehydrogenase C-terminal|PF16078:2-…	-0.400751	0.0167698	0.842971	0.000120609
CGTRNA_RS05660	cg1282	cg1282	1181586	1182305	720	-//- && -	-0.94869	1.65797e-06	-1.29552	7.00729e-09
CGTRNA_RS05665	cg1283	aroE2	1182337	1183143	807	sp|P44774|Y607_HAEIN Shikimate 5-dehydrogenase-like protein HI_0607 OS=Haemophilus influenzae (strain ATCC 51907 / DSM 11121 / KW20 / Rd) GN=HI_0607 PE=1 SV=1//4.86852e-85 && PF08501:Shikimate dehydrogenase substrate binding domain	-1.09352	3.44879e-10	-1.86446	2.95395e-17
CGTRNA_RS05670	cg1284	lipT	1183434	1185074	1641	sp|P37967|PNBA_BACSU Para-nitrobenzyl esterase OS=Bacillus subtilis (strain 168) GN=pnbA PE=1 SV=2//3.81946e-82 && PF00135:Carboxylesterase family	0.920415	9.02177e-05	1.33725	3.39899e-07
CGTRNA_RS05675	cg1285	cg1285	1185075	1185728	654	-//- && PF11575:FhuF 2Fe-2S C-terminal domain	0.595949	0.0236384	1.50575	2.09463e-07
CGTRNA_RS05695	cg1289	cg1289	1188511	1189860	1350	sp|P9WG87|Y1250_MYCTU Uncharacterized MFS-type transporter Rv1250 OS=Mycobacterium tuberculosis (strain ATCC 25618 / H37Rv) GN=Rv1250 PE=3 SV=1//2.14749e-78 && PF07690:Major Facilitator Superfamily	-0.933305	0.020032	1.48333	1.00828e-06
CGTRNA_RS05700	cg1290	metE	1189853	1192090	2238	sp|Q8NRB3|METE_CORGL 5-methyltetrahydropteroyltriglutamate--homocysteine methyltransferase OS=Corynebacterium glutamicum (strain ATCC 13032 / DSM 20300 / JCM 1318 / LMG 3730 / NCIMB 10025) GN=metE PE=3 SV=1//0 && PF08267:Cobalamin-independent synthase, N-terminal domain|PF01717:Cobalamin-independent synthase, Catalytic domain	-1.93399	1.14917e-30	0.684158	0.00888063
CGTRNA_RS05705	cg1291	cg1291	1192666	1193013	348	-//- && -	-2.54482	5.43845e-15	0.748469	0.0268934
CGTRNA_RS05740	cg1298	cydC	1199455	1201011	1557	sp|P23886|CYDC_ECOLI ATP-binding/permease protein CydC OS=Escherichia coli (strain K12) GN=cydC PE=3 SV=2//1.16341e-15 && PF00005:ABC transporter|PF00664:ABC transporter transmembrane region	-2.53119	6.09746e-33	-1.61545	1.6939e-06
CGTRNA_RS05745	cg1299	cydD	1201008	1202483	1476	sp|P45082|CYDD_HAEIN ATP-binding/permease protein CydD OS=Haemophilus influenzae (strain ATCC 51907 / DSM 11121 / KW20 / Rd) GN=cydD PE=3 SV=1//7.42475e-46 && PF00664:ABC transporter transmembrane region|PF13304:AAA domain, putative AbiEii toxin, Type IV TA system|PF00005:ABC transporter	-2.40236	3.64147e-36	-1.79119	1.59503e-08
CGTRNA_RS05750	cg1300	cydB	1202555	1203556	1002	sp|P94365|CYDB_BACSU Cytochrome bd ubiquinol oxidase subunit 2 OS=Bacillus subtilis (strain 168) GN=cydB PE=3 SV=1//8.60521e-66 && PF02322:Cytochrome bd terminal oxidase subunit II	-2.96666	7.85578e-55	-2.48361	5.20451e-15
CGTRNA_RS05755	cg1301	cydA	1203559	1205100	1542	sp|P94364|CYDA_BACSU Cytochrome bd ubiquinol oxidase subunit 1 OS=Bacillus subtilis (strain 168) GN=cydA PE=3 SV=1//3.40326e-108 && PF01654:Cytochrome bd terminal oxidase subunit I	-3.32801	1.78213e-74	-3.0059	5.04156e-25
CGTRNA_RS05780	cg1307	cg1307	1211402	1213600	2199	sp|P9WH05|DEAD_MYCTU ATP-dependent RNA helicase DeaD OS=Mycobacterium tuberculosis (strain ATCC 25618 / H37Rv) GN=deaD PE=1 SV=1//0 && PF00270:DEAD/DEAH box helicase|PF00271:Helicase conserved C-terminal domain|PF03880:DbpA RNA binding domain	-3.52664	1.71149e-48	-0.596321	0.0244844
CGTRNA_RS05785	cg1308	cg1308	1213894	1214583	690	sp|P40950|YUXN_BACSU Uncharacterized HTH-type transcriptional regulator YuxN OS=Bacillus subtilis (strain 168) GN=yuxN PE=3 SV=2//7.17403e-06 && PF00440:Bacterial regulatory proteins, tetR family	-0.86309	0.0404773	-1.1778	0.00692435
CGTRNA_RS05805	cg1312	cg1312	1218369	1218842	474	-//- && -	-0.692825	0.00452442	-1.31467	7.35673e-06
CGTRNA_RS05815	cg1314	putP	1219496	1221070	1575	sp|P94392|YCGO_BACSU Uncharacterized symporter YcgO OS=Bacillus subtilis (strain 168) GN=ycgO PE=3 SV=3//7.69642e-138 && PF00474:Sodium:solute symporter family	1.61252	0.0229203	-1.48479	9.39968e-08
CGTRNA_RS05835	cg1319	cg1319	1226534	1229164	2631	sp|P64796|Y1309_MYCBO Uncharacterized protein Mb1309 OS=Mycobacterium bovis (strain ATCC BAA-935 / AF2122/97) GN=Mb1309 PE=4 SV=1//1.12112e-23 && PF13175:AAA ATPase domain	-1.20651	0.000207416	1.15142	1.46638e-05
CGTRNA_RS05865	cg1326	cg1326	1232379	1232801	423	-//- && -	-1.8059	6.33909e-19	-2.28348	1.84596e-14
CGTRNA_RS05870	cg1327	cg1327	1233279	1233950	672	sp|P46148|ETRA_SHEON Electron transport regulator A OS=Shewanella oneidensis (strain MR-1) GN=etrA PE=3 SV=2//2.37329e-14 && PF00027:Cyclic nucleotide-binding domain|PF13545:Crp-like helix-turn-helix domain	-2.51733	3.63269e-44	-0.853756	0.000597342
CGTRNA_RS05875	cg1328	cg1328	1234071	1234307	237	sp|Q6GDP0|COPZ_STAAR Copper chaperone CopZ OS=Staphylococcus aureus (strain MRSA252) GN=copZ PE=3 SV=1//8.67998e-10 && PF00403:Heavy-metal-associated domain	-1.7925	5.3525e-15	-0.980306	0.000461559
CGTRNA_RS05905	cg1334	lysA	1241397	1242734	1338	sp|P09890|DCDA_CORGL Diaminopimelate decarboxylase OS=Corynebacterium glutamicum (strain ATCC 13032 / DSM 20300 / JCM 1318 / LMG 3730 / NCIMB 10025) GN=lysA PE=2 SV=1//0 && PF00278:Pyridoxal-dependent decarboxylase, C-terminal sheet domain|PF02784:Pyridoxal-dependent decarboxylase, pyridoxal binding domain	0.530964	0.0205029	0.981134	0.0017218
CGTRNA_RS05920	cg1337	hom	1243975	1245312	1338	sp|P08499|DHOM_CORGL Homoserine dehydrogenase OS=Corynebacterium glutamicum (strain ATCC 13032 / DSM 20300 / JCM 1318 / LMG 3730 / NCIMB 10025) GN=hom PE=1 SV=1//0 && PF01842:ACT domain|PF03447:Homoserine dehydrogenase, NAD binding domain|PF00742:Homoserine dehydrogenase	1.32412	2.97545e-10	0.529568	0.0478608
CGTRNA_RS05925	cg1338	thrB	1245323	1246252	930	sp|P07128|KHSE_CORGL Homoserine kinase OS=Corynebacterium glutamicum (strain ATCC 13032 / DSM 20300 / JCM 1318 / LMG 3730 / NCIMB 10025) GN=thrB PE=1 SV=4//0 && PF00288:GHMP kinases N terminal domain	1.19922	2.0602e-09	1.38176	8.82857e-09
CGTRNA_RS05930	cg1340	cg1340	1246308	1247000	693	-//- && -	-1.69943	9.58749e-10	-0.690188	0.0129965
CGTRNA_RS05935	cg1341	narI	1247185	1247964	780	sp|P9WJQ1|NARX_MYCTU Nitrate reductase-like protein NarX OS=Mycobacterium tuberculosis (strain ATCC 25618 / H37Rv) GN=narX PE=1 SV=1//1.97177e-62 && PF02665:Nitrate reductase gamma subunit	-2.73002	2.35572e-38	1.19824	2.38967e-07
CGTRNA_RS05940	cg1342	narJ	1247973	1248659	687	sp|P9WJQ1|NARX_MYCTU Nitrate reductase-like protein NarX OS=Mycobacterium tuberculosis (strain ATCC 25618 / H37Rv) GN=narX PE=1 SV=1//4.72383e-14 && PF02613:Nitrate reductase delta subunit	-2.48362	1.00469e-34	1.65314	2.93807e-14
CGTRNA_RS05945	cg1343	narH	1248664	1250259	1596	sp|P42176|NARH_BACSU Nitrate reductase beta chain OS=Bacillus subtilis (strain 168) GN=narH PE=3 SV=1//0 && PF14711:Respiratory nitrate reductase beta C-terminal|PF13247:4Fe-4S dicluster domain	-2.85204	2.50139e-69	1.28344	7.71571e-10
CGTRNA_RS05950	cg1344	narG	1250259	1254005	3747	sp|P9WJQ3|NARG_MYCTU Nitrate reductase alpha subunit OS=Mycobacterium tuberculosis (strain ATCC 25618 / H37Rv) GN=narG PE=1 SV=1//0 && PF00384:Molybdopterin oxidoreductase|PF01568:Molydopterin dinucleotide binding domain	-2.44096	5.32788e-41	0.928818	1.1547e-05
CGTRNA_RS05970	cg1348	cg1348	1258316	1259326	1011	sp|P9WLQ7|Y1841_MYCTU Uncharacterized protein Rv1841c OS=Mycobacterium tuberculosis (strain ATCC 25618 / H37Rv) GN=Rv1841c PE=1 SV=1//9.3405e-28 && PF00571:CBS domain|PF01595:Domain of unknown function DUF21	2.98166	4.30806e-14	3.04853	1.47989e-19
CGTRNA_RS05975	cg1349	cg1349	1259330	1260733	1404	sp|P9WFP2|Y1842_MYCTO UPF0053 protein MT1890 OS=Mycobacterium tuberculosis (strain CDC 1551 / Oshkosh) GN=MT1890 PE=3 SV=1//1.4935e-52 && PF00571:CBS domain|PF03471:Transporter associated domain|PF01595:Domain of unknown function DUF21	2.7688	2.4683e-23	1.24816	4.2786e-06
CGTRNA_RS06010	cg1356	cg1356	1269975	1270814	840	sp|P0DJB1|PRMC_CORGL Release factor glutamine methyltransferase OS=Corynebacterium glutamicum (strain ATCC 13032 / DSM 20300 / JCM 1318 / LMG 3730 / NCIMB 10025) GN=prmC PE=3 SV=1//0 && PF05175:Methyltransferase small domain	-0.890796	0.0096398	2.04774	8.74892e-15
CGTRNA_RS06015	cg1358	cg1358	1270864	1271514	651	sp|P9WGC9|TSAC_MYCTU Putative threonylcarbamoyl-AMP synthase OS=Mycobacterium tuberculosis (strain ATCC 25618 / H37Rv) GN=Rv1301 PE=1 SV=1//2.55662e-92 && PF01300:Telomere recombination	1.05617	4.7275e-07	1.19891	2.36472e-06
CGTRNA_RS06020	cg1359	cg1359	1271515	1272663	1149	sp|P9WMW5|WECA_MYCTU Decaprenyl-phosphate N-acetylglucosaminephosphotransferase OS=Mycobacterium tuberculosis (strain ATCC 25618 / H37Rv) GN=wecA PE=1 SV=1//5.81516e-115 && PF00953:Glycosyl transferase family 4	1.32034	4.41234e-10	1.77518	5.26704e-13
CGTRNA_RS06035	cg1362	atpB	1273808	1274620	813	sp|C1A1Y4|ATP6_RHOE4 ATP synthase subunit a OS=Rhodococcus erythropolis (strain PR4 / NBRC 100887) GN=atpB PE=3 SV=1//2.23525e-102 && PF00119:ATP synthase A chain	-1.77559	1.2731e-14	0.854159	9.72482e-05
CGTRNA_RS06040	cg1363	atpE	1274754	1274996	243	sp|A5CQ53|ATPL_CLAM3 ATP synthase subunit c OS=Clavibacter michiganensis subsp. michiganensis (strain NCPPB 382) GN=atpE PE=3 SV=1//7.86384e-15 && PF00137:ATP synthase subunit C	-2.1787	1.88981e-35	1.03829	1.4054e-06
CGTRNA_RS06045	cg1364	atpF	1275027	1275593	567	sp|Q79VG9|ATPF_CORGL ATP synthase subunit b OS=Corynebacterium glutamicum (strain ATCC 13032 / DSM 20300 / JCM 1318 / LMG 3730 / NCIMB 10025) GN=atpF PE=3 SV=1//9.43372e-108 && PF00430:ATP synthase B/B' CF(0)	-1.63262	8.85426e-21	1.47166	1.92862e-12
CGTRNA_RS06050	cg1365	atpH	1275599	1276414	816	sp|Q7DIC8|ATPD_CORGL ATP synthase subunit delta OS=Corynebacterium glutamicum (strain ATCC 13032 / DSM 20300 / JCM 1318 / LMG 3730 / NCIMB 10025) GN=atpH PE=3 SV=1//1.00328e-172 && PF00213:ATP synthase delta (OSCP) subunit	-1.7281	9.52184e-23	1.79996	9.50853e-18
CGTRNA_RS06055	cg1366	atpA	1276476	1278119	1644	sp|Q79VG7|ATPA_CORGL ATP synthase subunit alpha OS=Corynebacterium glutamicum (strain ATCC 13032 / DSM 20300 / JCM 1318 / LMG 3730 / NCIMB 10025) GN=atpA PE=3 SV=1//0 && PF00306:ATP synthase alpha/beta chain, C terminal domain|PF00006:ATP synthase alpha/beta family, nucleotide-binding domain|PF02874:ATP synthase alpha/beta family, beta-barrel domain	-1.58878	2.18047e-23	2.22334	3.75881e-26
CGTRNA_RS06060	cg1367	atpG	1278176	1279153	978	sp|Q79VG6|ATPG_CORGL ATP synthase gamma chain OS=Corynebacterium glutamicum (strain ATCC 13032 / DSM 20300 / JCM 1318 / LMG 3730 / NCIMB 10025) GN=atpG PE=3 SV=1//0 && PF00231:ATP synthase	-1.34074	1.21655e-16	2.50456	2.13842e-33
CGTRNA_RS06065	cg1368	atpD	1279156	1280607	1452	sp|A4QDH3|ATPB_CORGB ATP synthase subunit beta OS=Corynebacterium glutamicum (strain R) GN=atpD PE=3 SV=1//0 && PF00006:ATP synthase alpha/beta family, nucleotide-binding domain|PF02874:ATP synthase alpha/beta family, beta-barrel domain	-1.21997	3.01904e-15	2.43015	9.14087e-31
CGTRNA_RS06070	cg1369	atpC	1280619	1280993	375	sp|Q9ETA7|ATPE_CORGL ATP synthase epsilon chain OS=Corynebacterium glutamicum (strain ATCC 13032 / DSM 20300 / JCM 1318 / LMG 3730 / NCIMB 10025) GN=atpC PE=3 SV=1//3.32449e-84 && PF02823:ATP synthase, Delta/Epsilon chain, beta-sandwich domain	-1.11104	3.5111e-10	2.34709	2.72656e-28
CGTRNA_RS06090	cg1373	cg1373	1282727	1283182	456	sp|O58010|MCE_PYRHO Methylmalonyl-CoA epimerase OS=Pyrococcus horikoshii (strain ATCC 700860 / DSM 12428 / JCM 9974 / NBRC 100139 / OT-3) GN=PH0272 PE=1 SV=1//1.15992e-26 && PF13669:Glyoxalase/Bleomycin resistance protein/Dioxygenase superfamily	-2.59405	3.87078e-44	-3.15246	4.52805e-43
CGTRNA_RS06105	cg1376	ssuD1	1284792	1285937	1146	sp|A1VPZ7|SSUD_POLNA Alkanesulfonate monooxygenase OS=Polaromonas naphthalenivorans (strain CJ2) GN=ssuD PE=3 SV=1//1.16586e-120 && PF00296:Luciferase-like monooxygenase	1.68438	0.032589	3.01547	6.55777e-07
CGTRNA_RS06110	cg1377	ssuC	1285985	1286755	771	sp|P40401|SSUC_BACSU Putative aliphatic sulfonates transport permease protein SsuC OS=Bacillus subtilis (strain 168) GN=ssuC PE=2 SV=1//4.30178e-54 && PF00528:Binding-protein-dependent transport system inner membrane component	2.21575	0.043825	3.98195	1.24342e-06
CGTRNA_RS06135	cg1383	cg1383	1293167	1294048	882	sp|P72477|ABCX_STRMU Putative ABC transporter ATP-binding protein OS=Streptococcus mutans serotype c (strain ATCC 700610 / UA159) GN=abcX PE=3 SV=2//1.12316e-57 && PF00005:ABC transporter	-1.83031	1.85158e-17	-0.517004	0.0407673
CGTRNA_RS06150	cg1386	fixA	1296903	1297691	789	sp|O33095|ETFB_MYCLE Electron transfer flavoprotein subunit beta OS=Mycobacterium leprae (strain TN) GN=etfB PE=3 SV=1//8.16657e-76 && PF01012:Electron transfer flavoprotein domain	1.43686	2.87061e-14	0.990858	2.83496e-05
CGTRNA_RS06155	cg1387	fixB	1297721	1298674	954	sp|P9WNG9|ETFA_MYCTU Electron transfer flavoprotein subunit alpha OS=Mycobacterium tuberculosis (strain ATCC 25618 / H37Rv) GN=etfA PE=1 SV=1//8.54521e-92 && PF00766:Electron transfer flavoprotein FAD-binding domain|PF01012:Electron transfer flavoprotein domain	1.54526	1.17471e-13	1.6693	9.38152e-12
CGTRNA_RS06180	cg1393	cg1393	1302020	1302526	507	sp|P63417|YHBS_ECOLI Uncharacterized N-acetyltransferase YhbS OS=Escherichia coli (strain K12) GN=yhbS PE=3 SV=1//4.27228e-07 && PF13527:Acetyltransferase (GNAT) domain	0.863783	0.0356489	1.04621	0.0152315
CGTRNA_RS06205	cg1398	cg1398	1306400	1307392	993	-//- && -	0.607426	0.00968322	1.44006	5.71846e-09
CGTRNA_RS06230	cg1403	gatC	1312788	1313087	300	sp|Q8NR18|GATC_CORGL Aspartyl/glutamyl-tRNA(Asn/Gln) amidotransferase subunit C OS=Corynebacterium glutamicum (strain ATCC 13032 / DSM 20300 / JCM 1318 / LMG 3730 / NCIMB 10025) GN=gatC PE=3 SV=1//8.5476e-56 && PF02686:Glu-tRNAGln amidotransferase C subunit	-0.600569	0.00352234	-2.03212	3.75461e-15
CGTRNA_RS06245	cg1408	cg1408	1315935	1316255	321	-//- && -	-1.23864	1.64542e-10	-2.72379	2.57344e-28
CGTRNA_RS06250	cg1409	pfkA	1316523	1317554	1032	sp|Q8NR14|PFKA_CORGL ATP-dependent 6-phosphofructokinase OS=Corynebacterium glutamicum (strain ATCC 13032 / DSM 20300 / JCM 1318 / LMG 3730 / NCIMB 10025) GN=pfkA PE=3 SV=1//0 && PF00365:Phosphofructokinase	-2.46222	4.10843e-25	-1.65531	1.06988e-13
CGTRNA_RS06260	cg1411	cg1411	1318902	1320476	1575	sp|Q8NR12|RBSA_CORGL Ribose import ATP-binding protein RbsA OS=Corynebacterium glutamicum (strain ATCC 13032 / DSM 20300 / JCM 1318 / LMG 3730 / NCIMB 10025) GN=rbsA PE=3 SV=1//0 && PF00005:ABC transporter	0.949962	0.0229275	1.19977	0.000607456
CGTRNA_RS06295	cg1420	gatB	1326223	1327728	1506	sp|A4QDM0|GATB_CORGB Aspartyl/glutamyl-tRNA(Asn/Gln) amidotransferase subunit B OS=Corynebacterium glutamicum (strain R) GN=gatB PE=3 SV=1//0 && PF02934:GatB/GatE catalytic domain|PF02637:GatB domain	-0.481112	0.00897618	-0.762782	0.00118052
CGTRNA_RS06310	cg1424	lysE	1329712	1330422	711	sp|P94633|LYSE_CORGL Lysine exporter protein OS=Corynebacterium glutamicum (strain ATCC 13032 / DSM 20300 / JCM 1318 / LMG 3730 / NCIMB 10025) GN=lysE PE=3 SV=2//7.11831e-152 && PF01810:LysE type translocator	0.717802	0.00870612	4.25842	3.64826e-81
CGTRNA_RS06320	cg1426	cg1426	1331357	1332436	1080	sp|P42620|YQJG_ECOLI Glutathionyl-hydroquinone reductase YqjG OS=Escherichia coli (strain K12) GN=yqjG PE=1 SV=1//5.20587e-65 && PF13409:Glutathione S-transferase, N-terminal domain|PF13410:Glutathione S-transferase, C-terminal domain	-1.16316	2.12664e-05	-1.23591	6.61689e-05
CGTRNA_RS06345	cg1434	yggB	1337561	1339135	1575	sp|P42531|Y1270_CORGL Uncharacterized protein Cgl1270/cg1434 OS=Corynebacterium glutamicum (strain ATCC 13032 / DSM 20300 / JCM 1318 / LMG 3730 / NCIMB 10025) GN=Cgl1270 PE=4 SV=2//0 && PF00924:Mechanosensitive ion channel	2.16615	8.97549e-22	1.2806	8.6984e-06
CGTRNA_RS06355	cg1436	ilvN	1341494	1342012	519	sp|P9WKJ3|ILVH_MYCTU Putative acetolactate synthase small subunit OS=Mycobacterium tuberculosis (strain ATCC 25618 / H37Rv) GN=ilvH PE=1 SV=1//3.55741e-58 && PF10369:Small subunit of acetolactate synthase|PF13710:ACT domain	0.661501	0.0222274	0.809148	0.0182123
CGTRNA_RS06380	-	-	1345240	1345503	264	-//- && -	1.28369	0.000149876	-1.23198	0.0148102
CGTRNA_RS06405	cg1448	cg1448	1347925	1349742	1818	sp|Q58099|Y686_METJA Uncharacterized protein MJ0686 OS=Methanocaldococcus jannaschii (strain ATCC 43067 / DSM 2661 / JAL-1 / JCM 10045 / NBRC 100440) GN=MJ0686 PE=4 SV=1//6.83966e-26 && PF03235:Protein of unknown function DUF262	-1.22667	2.1882e-09	-0.510933	0.0289037
CGTRNA_RS06410	cg1449	cg1449	1349801	1351546	1746	-//- && -	-0.495961	0.0212536	0.717983	0.00197547
CGTRNA_RS06430	cg1454	cg1454	1356004	1357020	1017	-//- && PF09084:NMT1/THI5 like	-0.980522	6.02246e-05	-0.848298	0.00108943
CGTRNA_RS06435	cg1456	cg1456	1357156	1359024	1869	sp|P54606|YHCV_BACSU CBS domain-containing protein YhcV OS=Bacillus subtilis (strain 168) GN=yhcV PE=3 SV=1//6.90393e-12 && PF00027:Cyclic nucleotide-binding domain|PF10335:Putative nucleotidyltransferase substrate binding domain|PF00571:CBS domain|PF03445:Putative nucleotidyltransferase DUF294	-1.09259	4.28936e-07	-0.86463	0.000436031
CGTRNA_RS06535	cg1478	cg1478	1374140	1374601	462	-//- && -	2.50494	2.52783e-11	1.03401	0.0110109
CGTRNA_RS06540	cg1479	glgP1	1374814	1377201	2388	sp|P73511|PHSG_SYNY3 Glycogen phosphorylase OS=Synechocystis sp. (strain PCC 6803 / Kazusa) GN=glgP PE=3 SV=1//0 && PF00343:Carbohydrate phosphorylase	-1.63352	7.68329e-28	-1.67122	2.1923e-07
CGTRNA_RS06560	cg1484	cg1484	1379930	1380409	480	-//- && -	-1.75094	1.2562e-06	-0.805696	0.0300324
CGTRNA_RS06575	cg1487	leuC	1381907	1383352	1446	sp|P58946|LEUC_CORGL 3-isopropylmalate dehydratase large subunit OS=Corynebacterium glutamicum (strain ATCC 13032 / DSM 20300 / JCM 1318 / LMG 3730 / NCIMB 10025) GN=leuC PE=2 SV=1//0 && PF00330:Aconitase family (aconitate hydratase)	0.94435	0.000129068	1.77998	1.54459e-07
CGTRNA_RS06580	cg1488	leuD	1383369	1383962	594	sp|Q8NQV7|LEUD_CORGL 3-isopropylmalate dehydratase small subunit OS=Corynebacterium glutamicum (strain ATCC 13032 / DSM 20300 / JCM 1318 / LMG 3730 / NCIMB 10025) GN=leuD PE=2 SV=1//1.41123e-145 && PF00694:Aconitase C-terminal domain	0.796853	0.0269175	2.45399	2.5975e-13
CGTRNA_RS06585	cg1490	cg1490	1384309	1385319	1011	sp|P9WIY3|MUTT1_MYCTU Probable 8-oxo-dGTP diphosphatase 1 OS=Mycobacterium tuberculosis (strain ATCC 25618 / H37Rv) GN=mutT1 PE=1 SV=1//1.33194e-79 && PF00293:NUDIX domain|PF00300:Histidine phosphatase superfamily (branch 1)	-0.582594	0.0158171	-0.89779	0.000274976
CGTRNA_RS06635	cg1500	cg1500	1394621	1395205	585	sp|O34331|YLBH_BACSU Putative rRNA methyltransferase YlbH OS=Bacillus subtilis (strain 168) GN=ylbH PE=3 SV=2//6.07829e-12 && PF03602:Conserved hypothetical protein 95	-0.728005	0.00663971	0.707585	0.00784731
CGTRNA_RS06645	cg1502	cg1502	1396264	1397016	753	sp|O34677|GLNQ_BACSU Glutamine transport ATP-binding protein GlnQ OS=Bacillus subtilis (strain 168) GN=glnQ PE=2 SV=1//6.95012e-87 && PF00005:ABC transporter	-0.80083	0.00329692	1.67712	1.4765e-11
CGTRNA_RS06650	cg1503	cg1503	1397032	1397982	951	sp|P35113|NOCM_AGRFC Nopaline transport system permease protein NocM OS=Agrobacterium fabrum (strain C58 / ATCC 33970) GN=nocM PE=3 SV=1//2.80206e-30 && PF00528:Binding-protein-dependent transport system inner membrane component	-1.04602	1.54023e-05	1.14481	1.41986e-05
CGTRNA_RS06665	cg1506	cg1506	1400021	1401001	981	-//- && PF04018:Domain of unknown function (DUF368)	1.26292	5.42557e-09	0.851405	0.0016045
CGTRNA_RS06800	cg1537	ptsG	1424684	1426735	2052	sp|Q46072|PTN3B_CORGL PTS system mannose-specific EIIBCA component OS=Corynebacterium glutamicum (strain ATCC 13032 / DSM 20300 / JCM 1318 / LMG 3730 / NCIMB 10025) GN=ptsM PE=3 SV=1//0 && PF00367:phosphotransferase system, EIIB|PF00358:phosphoenolpyruvate-dependent sugar phosphotransferase system, EIIA 1|PF02378:Phosphotransferase system, EIIC	-1.33632	8.25726e-12	-0.95422	8.18419e-06
CGTRNA_RS06805	cg1538	cg1538	1426746	1427348	603	sp|P58897|COAE_CORGL Dephospho-CoA kinase OS=Corynebacterium glutamicum (strain ATCC 13032 / DSM 20300 / JCM 1318 / LMG 3730 / NCIMB 10025) GN=coaE PE=3 SV=1//5.45513e-123 && PF01121:Dephospho-CoA kinase	-1.8774	1.04934e-21	-1.29239	5.76673e-08
CGTRNA_RS06825	cg1543	iunH3	1429688	1430626	939	sp|P83851|IUNH_LEIMA Inosine-uridine preferring nucleoside hydrolase OS=Leishmania major GN=NSNH PE=1 SV=3//1.73522e-131 && PF01156:Inosine-uridine preferring nucleoside hydrolase	1.99605	4.68179e-12	1.79919	1.72823e-08
CGTRNA_RS06830	cg1545	cg1545	1430658	1432109	1452	sp|P9WG90|STP_MYCTO Multidrug resistance protein Stp OS=Mycobacterium tuberculosis (strain CDC 1551 / Oshkosh) GN=stp PE=3 SV=1//6.34497e-14 && PF07690:Major Facilitator Superfamily	-1.68691	1.09201e-05	2.23745	1.08361e-13
CGTRNA_RS06835	cg1546	rbsK1	1432123	1433046	924	sp|O60116|RBSK_SCHPO Putative ribokinase OS=Schizosaccharomyces pombe (strain 972 / ATCC 24843) GN=SPBC16G5.02c PE=3 SV=1//4.11646e-40 && PF00294:pfkB family carbohydrate kinase	-1.97935	5.60601e-05	1.96232	6.126e-08
CGTRNA_RS06855	cg1550	uvrB	1435572	1437671	2100	sp|Q6NHI3|UVRB_CORDI UvrABC system protein B OS=Corynebacterium diphtheriae (strain ATCC 700971 / NCTC 13129 / Biotype gravis) GN=uvrB PE=3 SV=1//0 && PF04851:Type III restriction enzyme, res subunit|PF12344:Ultra-violet resistance protein B|PF00271:Helicase conserved C-terminal domain|PF02151:UvrB/uvrC motif	-0.5685	0.0010591	-0.748916	0.000938332
CGTRNA_RS06860	cg1551	uspA1	1437802	1438245	444	sp|P9WFC9|Y1636_MYCTU Universal stress protein Rv1636 OS=Mycobacterium tuberculosis (strain ATCC 25618 / H37Rv) GN=Rv1636 PE=1 SV=1//8.90784e-25 && PF00582:Universal stress protein family	-0.587946	0.00171104	-2.65827	6.4444e-36
CGTRNA_RS06870	cg1553	cg1553	1438823	1439671	849	sp|P39315|QOR2_ECOLI Quinone oxidoreductase 2 OS=Escherichia coli (strain K12) GN=qorB PE=1 SV=1//1.20275e-75 && PF05368:NmrA-like family	1.24405	0.00134145	0.753323	0.0466201
CGTRNA_RS06875	cg1555	cg1555	1439676	1441943	2268	sp|O32215|HELD_BACSU Helicase IV OS=Bacillus subtilis (strain 168) GN=helD PE=1 SV=1//2.82953e-26 && PF13245:AAA domain|PF13538:UvrD-like helicase C-terminal domain	1.78818	4.52593e-10	1.04232	1.26257e-05
CGTRNA_RS06880	cg1556	cg1556	1442139	1443053	915	-//- && PF07681:DoxX	1.33624	1.06162e-16	-0.618281	0.0190753
CGTRNA_RS06935	cg1570	ugpB	1454225	1455541	1317	sp|Q1R5H5|UGPB_ECOUT sn-glycerol-3-phosphate-binding periplasmic protein UgpB OS=Escherichia coli (strain UTI89 / UPEC) GN=ugpB PE=3 SV=1//4.45009e-29 && PF10518:TAT (twin-arginine translocation) pathway signal sequence|PF13416:Bacterial extracellular solute-binding protein	1.18132	0.0258852	1.32608	0.0222421
CGTRNA_RS06950	cg1573	tsnR	1457603	1458418	816	sp|P94538|YSGA_BACSU Uncharacterized tRNA/rRNA methyltransferase YsgA OS=Bacillus subtilis (strain 168) GN=ysgA PE=3 SV=2//1.22124e-22 && PF00588:SpoU rRNA Methylase family|PF08032:RNA 2'-O ribose methyltransferase substrate binding	-1.21403	1.25371e-08	-0.810147	0.00169369
CGTRNA_RS06960	cg1575	pheT	1459579	1462086	2508	sp|Q8NQN6|SYFB_CORGL Phenylalanine--tRNA ligase beta subunit OS=Corynebacterium glutamicum (strain ATCC 13032 / DSM 20300 / JCM 1318 / LMG 3730 / NCIMB 10025) GN=pheT PE=3 SV=2//0 && PF01588:Putative tRNA binding domain|PF03147:Ferredoxin-fold anticodon binding domain|PF03483:B3/4 domain|PF03484:tRNA synthetase B5 domain	-0.563894	0.00559086	1.49356	9.17395e-12
CGTRNA_RS06970	cg1578	cg1578	1463601	1464986	1386	sp|Q00718|MDMB_STRMY Acyltransferase MdmB OS=Streptomyces mycarofaciens GN=mdmB PE=3 SV=1//4.44901e-39 && PF01757:Acyltransferase family	-0.397224	0.0353784	0.906699	0.000111635
CGTRNA_RS06985	cg1581	argJ	1466677	1467843	1167	sp|Q59280|ARGJ_CORGL Arginine biosynthesis bifunctional protein ArgJ OS=Corynebacterium glutamicum (strain ATCC 13032 / DSM 20300 / JCM 1318 / LMG 3730 / NCIMB 10025) GN=argJ PE=3 SV=2//0 && PF01960:ArgJ family	-1.9478	5.12502e-13	0.891672	0.00200045
CGTRNA_RS06990	cg1582	argB	1467889	1468842	954	sp|A4QDZ0|ARGB_CORGB Acetylglutamate kinase OS=Corynebacterium glutamicum (strain R) GN=argB PE=3 SV=1//0 && PF00696:Amino acid kinase family	-1.83721	1.93588e-08	1.58003	2.16674e-09
CGTRNA_RS06995	cg1583	argD	1468843	1470018	1176	sp|Q59282|ARGD_CORGL Acetylornithine aminotransferase OS=Corynebacterium glutamicum (strain ATCC 13032 / DSM 20300 / JCM 1318 / LMG 3730 / NCIMB 10025) GN=argD PE=3 SV=2//0 && PF00202:Aminotransferase class-III	-1.154	5.23373e-08	1.87929	1.67219e-15
CGTRNA_RS07000	cg1584	argF	1470032	1470991	960	sp|Q59283|OTC_CORGL Ornithine carbamoyltransferase OS=Corynebacterium glutamicum (strain ATCC 13032 / DSM 20300 / JCM 1318 / LMG 3730 / NCIMB 10025) GN=argF PE=3 SV=2//0 && PF02729:Aspartate/ornithine carbamoyltransferase, carbamoyl-P binding domain|PF00185:Aspartate/ornithine carbamoyltransferase, Asp/Orn binding domain	-1.39689	1.68301e-09	1.98192	1.81235e-17
CGTRNA_RS07005	cg1585	argR	1470995	1471510	516	sp|O85175|ARGR_CORGL Arginine repressor OS=Corynebacterium glutamicum (strain ATCC 13032 / DSM 20300 / JCM 1318 / LMG 3730 / NCIMB 10025) GN=argR PE=3 SV=2//1.37285e-119 && PF02863:Arginine repressor, C-terminal domain|PF01316:Arginine repressor, DNA binding domain	-1.03429	0.00210647	1.9645	9.6706e-12
CGTRNA_RS07035	cg1592	cg1592	1477810	1477989	180	sp|A8FX58|Y2824_SHESH UPF0434 protein Ssed_2824 OS=Shewanella sediminis (strain HAW-EB3) GN=Ssed_2824 PE=3 SV=1//2.36792e-12 && PF03966:Trm112p-like protein	-0.600806	0.0110593	-1.51804	5.75185e-07
CGTRNA_RS07070	cg1597	cg1597	1486193	1487497	1305	-//- && -	-0.408071	0.0308513	-0.6708	0.00313238
CGTRNA_RS07105	cg1604	cg1604	1493614	1494579	966	sp|P9WJ83|MCTB_MYCTU Copper transporter MctB OS=Mycobacterium tuberculosis (strain ATCC 25618 / H37Rv) GN=mctB PE=1 SV=1//3.22248e-20 && PF11382:Copper transport outer membrane protein, MctB	-1.09792	5.39907e-09	0.757929	0.000796499
CGTRNA_RS07110	cg1606	pyrG	1494980	1496644	1665	sp|Q8NQL7|PYRG_CORGL CTP synthase OS=Corynebacterium glutamicum (strain ATCC 13032 / DSM 20300 / JCM 1318 / LMG 3730 / NCIMB 10025) GN=pyrG PE=3 SV=1//0 && PF00117:Glutamine amidotransferase class-I|PF06418:CTP synthase N-terminus	2.35876	6.17034e-26	2.17842	1.51994e-18
CGTRNA_RS07115	cg1607	cg1607	1496660	1497331	672	sp|Q8KP10|ACT_BACMT Methanol dehydrogenase activator OS=Bacillus methanolicus GN=act PE=1 SV=1//7.104e-26 && PF00293:NUDIX domain	0.481973	0.0441289	1.09029	4.43804e-05
CGTRNA_RS07135	cg1611	cg1611	1501398	1502165	768	sp|Q24V65|SCPA_DESHY Segregation and condensation protein A OS=Desulfitobacterium hafniense (strain Y51) GN=scpA PE=3 SV=1//2.86502e-24 && PF02616:Segregation and condensation protein ScpA	0.908136	0.0156461	0.782449	0.0214776
CGTRNA_RS07140	cg1612	cg1612	1502375	1502938	564	-//- && PF13302:Acetyltransferase (GNAT) domain	4.36258	5.25074e-08	-2.97697	1.9818e-05
CGTRNA_RS07145	cg1613	sseA2	1503177	1504046	870	sp|P58388|THTM_ECO57 3-mercaptopyruvate sulfurtransferase OS=Escherichia coli O157:H7 GN=sseA PE=3 SV=2//1.11767e-45 && PF00581:Rhodanese-like domain	-0.996124	1.84003e-06	-1.56373	1.36583e-10
CGTRNA_RS07150	cg1614	cg1614	1504068	1504646	579	sp|Q2RIR6|SCPB_MOOTA Segregation and condensation protein B OS=Moorella thermoacetica (strain ATCC 39073) GN=scpB PE=3 SV=1//1.05598e-26 && PF04079:Segregation and condensation complex subunit ScpB	-0.888467	0.00332212	-1.72605	2.71566e-07
CGTRNA_RS07165	cg1617	cg1617	1506430	1508043	1614	sp|Q8NQK6|DER_CORGL GTPase Der OS=Corynebacterium glutamicum (strain ATCC 13032 / DSM 20300 / JCM 1318 / LMG 3730 / NCIMB 10025) GN=der PE=3 SV=1//0 && PF01926:50S ribosome-binding GTPase|PF14714:KH-domain-like of EngA bacterial GTPase enzymes, C-terminal	-0.880713	0.000649952	0.810076	0.000255213
CGTRNA_RS07170	cg1618	cg1618	1508126	1508794	669	-//- && PF13599:Pentapeptide repeats (9 copies)	0.803436	2.55493e-05	-0.866433	0.00102413
CGTRNA_RS07190	cg1622	cg1622	1511857	1513602	1746	sp|P71082|YGAD_BACSU Putative multidrug export ATP-binding/permease protein YgaD OS=Bacillus subtilis (strain 168) GN=ygaD PE=3 SV=2//1.50632e-58 && PF00005:ABC transporter|PF00664:ABC transporter transmembrane region	1.27646	0.0163555	1.93027	8.10485e-05
CGTRNA_RS07225	cg1629	secA2	1518637	1520928	2292	sp|Q8NQJ4|SECA2_CORGL Protein translocase subunit SecA 2 OS=Corynebacterium glutamicum (strain ATCC 13032 / DSM 20300 / JCM 1318 / LMG 3730 / NCIMB 10025) GN=secA2 PE=3 SV=1//0 && PF01043:SecA preprotein cross-linking domain|PF07517:SecA DEAD-like domain|PF07516:SecA Wing and Scaffold domain	-0.404636	0.0241087	-0.658824	0.00467228
CGTRNA_RS07245	cg1633	cg1633	1523238	1523813	576	sp|P67672|Y1861_MYCBO Uncharacterized HTH-type transcriptional regulator Mb1861 OS=Mycobacterium bovis (strain ATCC BAA-935 / AF2122/97) GN=Mb1861 PE=3 SV=1//1.37649e-79 && PF13411:MerR HTH family regulatory protein	-1.22462	1.9045e-07	-0.684598	0.00701896
CGTRNA_RS07250	cg1635	cg1635	1523896	1524408	513	-//- && PF08044:Domain of unknown function (DUF1707)	-0.882141	0.000120939	-0.695216	0.0110109
CGTRNA_RS07265	cg1639	cg1639	1526937	1528001	1065	sp|P9WLQ7|Y1841_MYCTU Uncharacterized protein Rv1841c OS=Mycobacterium tuberculosis (strain ATCC 25618 / H37Rv) GN=Rv1841c PE=1 SV=1//3.33433e-89 && PF01595:Domain of unknown function DUF21	-0.962754	0.00193974	0.663312	0.0407814
CGTRNA_RS07270	cg1640	cg1640	1527998	1529380	1383	sp|P9WFP3|Y1842_MYCTU UPF0053 protein Rv1842c OS=Mycobacterium tuberculosis (strain ATCC 25618 / H37Rv) GN=Rv1842c PE=1 SV=1//1.0572e-138 && PF01595:Domain of unknown function DUF21|PF03471:Transporter associated domain	-0.844501	0.000101773	-0.572726	0.0486492
CGTRNA_RS07275	cg1641	cg1641	1529451	1530797	1347	sp|P25888|RHLE_ECOLI ATP-dependent RNA helicase RhlE OS=Escherichia coli (strain K12) GN=rhlE PE=1 SV=3//9.86248e-75 && PF00270:DEAD/DEAH box helicase|PF00271:Helicase conserved C-terminal domain	-0.940301	1.90036e-06	-1.10876	1.00884e-05
CGTRNA_RS07285	cg1643	gnd	1531805	1533259	1455	sp|P80859|6PGD_BACSU 6-phosphogluconate dehydrogenase, NADP(+)-dependent, decarboxylating OS=Bacillus subtilis (strain 168) GN=gndA PE=1 SV=4//0 && PF00393:6-phosphogluconate dehydrogenase, C-terminal domain|PF03446:NAD binding domain of 6-phosphogluconate dehydrogenase	-0.502903	0.0147281	0.813822	0.000221241
CGTRNA_RS07295	cg1645	cg1645	1533882	1534466	585	sp|P26236|BCHM_RHOCA Magnesium-protoporphyrin O-methyltransferase OS=Rhodobacter capsulatus GN=bchM PE=1 SV=1//9.15849e-07 && PF13649:Methyltransferase domain	0.946685	3.26896e-05	-1.56429	8.45746e-07
CGTRNA_RS07305	cg1647	cg1647	1535248	1535991	744	-//- && PF01061:ABC-2 type transporter	-1.00671	1.16392e-05	-1.33255	8.11465e-07
CGTRNA_RS07360	cg1658	cg1658	1547771	1549159	1389	sp|P37643|YHJE_ECOLI Inner membrane metabolite transport protein YhjE OS=Escherichia coli (strain K12) GN=yhjE PE=1 SV=1//3.9064e-109 && PF00083:Sugar (and other) transporter	1.12852	0.00536341	2.01529	2.00955e-08
CGTRNA_RS07385	cg1663	cg1663	1553042	1553707	666	-//- && PF08713:DNA alkylation repair enzyme	-0.687979	0.0151801	-1.6165	2.0122e-06
CGTRNA_RS07415	cg1671	cg1671	1557843	1558241	399	sp|P9WHJ5|RBPA_MYCTU RNA polymerase-binding protein RbpA OS=Mycobacterium tuberculosis (strain ATCC 25618 / H37Rv) GN=rbpA PE=1 SV=1//2.50255e-44 && PF13397:RNA polymerase-binding protein	1.09511	3.2212e-09	-1.71412	1.27316e-11
CGTRNA_RS07420	cg1672	ppmC	1558478	1559290	813	sp|C5CBV8|MPUS_MICLC Undecaprenyl-phosphate mannosyltransferase OS=Micrococcus luteus (strain ATCC 4698 / DSM 20030 / JCM 1464 / NBRC 3333 / NCIMB 9278 / NCTC 2665 / VKM Ac-2230) GN=Mlut_12000 PE=1 SV=1//4.70074e-88 && PF00535:Glycosyl transferase family 2	0.459108	0.0147281	0.58487	0.0201216
CGTRNA_RS07425	cg1673	ppmN	1559323	1560960	1638	sp|Q8EHP1|LNT_SHEON Apolipoprotein N-acyltransferase OS=Shewanella oneidensis (strain MR-1) GN=lnt PE=3 SV=1//1.39378e-33 && PF00795:Carbon-nitrogen hydrolase	-0.814652	0.000316002	1.30697	5.92096e-05
CGTRNA_RS07470	cg1684	tatC	1571396	1572340	945	sp|P9WG97|TATC_MYCTU Sec-independent protein translocase protein TatC OS=Mycobacterium tuberculosis (strain ATCC 25618 / H37Rv) GN=tatC PE=1 SV=1//3.80591e-79 && PF00902:Sec-independent protein translocase protein (TatC)	-0.512079	0.0245027	-0.639466	0.0142308
CGTRNA_RS07480	cg1686	cg1686	1572970	1573953	984	sp|P54075|PAFC_MYCLE Protein PafC OS=Mycobacterium leprae (strain TN) GN=pafC PE=3 SV=2//1.45345e-31 && PF13280:WYL domain	-1.07418	0.000431878	0.823443	0.00157267
CGTRNA_RS07500	cg1690	cg1690	1576870	1578414	1545	sp|A0QZ49|DOP_MYCS2 Pup deamidase/depupylase OS=Mycobacterium smegmatis (strain ATCC 700084 / mc(2)155) GN=dop PE=1 SV=1//1.05608e-165 && PF03136:Pup-ligase protein	-1.75458	1.91052e-20	0.746686	0.00122918
CGTRNA_RS07525	cg1695	cg1695	1583324	1583584	261	sp|Q46560|VAPI_DICNO Virulence-associated protein I OS=Dichelobacter nodosus GN=vapI PE=3 SV=1//9.11655e-13 && PF01381:Helix-turn-helix	0.871118	0.00208944	-1.05933	0.00618008
CGTRNA_RS07545	cg1699	hisE	1587929	1588201	273	sp|A4QE91|HIS2_CORGB Phosphoribosyl-ATP pyrophosphatase OS=Corynebacterium glutamicum (strain R) GN=hisE PE=3 SV=1//1.65404e-61 && PF01503:Phosphoribosyl-ATP pyrophosphohydrolase	-0.50069	0.00638991	-0.848918	0.000330204
CGTRNA_RS07550	cg1700	cg1700	1588276	1588971	696	sp|Q94529|GS1_DROME Probable pseudouridine-5&apos;-phosphatase OS=Drosophila melanogaster GN=Gs1l PE=2 SV=2//4.17328e-19 && PF13419:Haloacid dehalogenase-like hydrolase	1.14925	1.98548e-08	0.977921	0.000137465
CGTRNA_RS07555	cg1701	metH	1589037	1592702	3666	sp|O33259|METH_MYCTU Methionine synthase OS=Mycobacterium tuberculosis (strain ATCC 25618 / H37Rv) GN=metH PE=1 SV=1//0 && PF00809:Pterin binding enzyme|PF02310:B12 binding domain|PF02574:Homocysteine S-methyltransferase|PF02965:Vitamin B12 dependent methionine synthase, activation domain|PF02607:B12 binding domain	-0.760475	0.000569308	1.0095	2.60948e-05
CGTRNA_RS07675	cg1726	mcmA	1615915	1617765	1851	sp|P9WJK7|MUTA_MYCTU Probable methylmalonyl-CoA mutase small subunit OS=Mycobacterium tuberculosis (strain ATCC 25618 / H37Rv) GN=mutA PE=1 SV=1//4.23875e-139 && PF01642:Methylmalonyl-CoA mutase	-1.59532	1.00894e-21	-1.81532	5.82141e-15
CGTRNA_RS07710	cg1734	hemH	1623305	1624417	1113	sp|Q8NQA1|HEMH_CORGL Ferrochelatase OS=Corynebacterium glutamicum (strain ATCC 13032 / DSM 20300 / JCM 1318 / LMG 3730 / NCIMB 10025) GN=hemH PE=3 SV=1//0 && PF00762:Ferrochelatase	-2.12312	1.23716e-09	-1.002	3.76411e-06
CGTRNA_RS07725	cg1737	acn	1627758	1630577	2820	sp|Q8NQ98|ACNA_CORGL Aconitate hydratase A OS=Corynebacterium glutamicum (strain ATCC 13032 / DSM 20300 / JCM 1318 / LMG 3730 / NCIMB 10025) GN=acn PE=1 SV=2//0 && PF00694:Aconitase C-terminal domain|PF00330:Aconitase family (aconitate hydratase)	-1.28387	1.6786e-16	0.58326	0.0218936
CGTRNA_RS07735	cg1739	cg1739	1631380	1632138	759	sp|Q58970|GUAAA_METJA GMP synthase [glutamine-hydrolyzing] subunit A OS=Methanocaldococcus jannaschii (strain ATCC 43067 / DSM 2661 / JAL-1 / JCM 10045 / NBRC 100440) GN=guaAA PE=1 SV=1//3.54e-09 && -	1.10965	4.95861e-06	1.0049	0.000166851
CGTRNA_RS07745	cg1741	cg1741	1632817	1633029	213	-//- && PF13396:Phospholipase_D-nuclease N-terminal	-1.19299	2.13887e-05	-1.76626	1.51755e-08
CGTRNA_RS07760	cg1744	pacL	1635033	1637711	2679	sp|P37367|ATA1_SYNY3 Cation-transporting ATPase pma1 OS=Synechocystis sp. (strain PCC 6803 / Kazusa) GN=pma1 PE=3 SV=2//0 && PF00689:Cation transporting ATPase, C-terminus|PF00690:Cation transporter/ATPase, N-terminus|PF00702:haloacid dehalogenase-like hydrolase|PF00122:E1-E2 ATPase	-2.5809	2.68261e-25	-1.10845	0.000126183
CGTRNA_RS07770	cg1746	cg1746	1638548	1639912	1365	-//- && -	-2.42747	8.60087e-31	-2.64461	5.10827e-27
CGTRNA_RS07815	cg1759	cg1759	1648676	1649089	414	sp|P70949|YITW_BACSU MIP18 family protein YitW OS=Bacillus subtilis (strain 168) GN=yitW PE=3 SV=2//5.68186e-14 && PF01883:Iron-sulfur cluster assembly protein	0.727515	0.000893119	1.03403	4.82791e-05
CGTRNA_RS07820	cg1760	cg1760	1649115	1649564	450	sp|O32163|SUFU_BACSU Zinc-dependent sulfurtransferase SufU OS=Bacillus subtilis (strain 168) GN=sufU PE=1 SV=1//8.94736e-33 && PF01592:NifU-like N terminal domain	0.619437	0.00216779	0.659461	0.0107972
CGTRNA_RS07830	cg1762	sufC	1650831	1651589	759	sp|P80866|SUFC_BACSU Vegetative protein 296 OS=Bacillus subtilis (strain 168) GN=sufC PE=1 SV=3//8.27119e-102 && PF00005:ABC transporter	0.556806	0.0383892	1.07347	6.48149e-05
CGTRNA_RS07835	cg1763	sufD	1651713	1652891	1179	sp|P59973|Y1497_MYCBO UPF0051 protein Mb1497 OS=Mycobacterium bovis (strain ATCC BAA-935 / AF2122/97) GN=Mb1497 PE=3 SV=1//9.63374e-147 && PF01458:Uncharacterized protein family (UPF0051)	0.759748	0.00562787	1.22458	2.43117e-07
CGTRNA_RS07840	cg1764	sufB	1652897	1654342	1446	sp|O32162|SUFB_BACSU FeS cluster assembly protein SufB OS=Bacillus subtilis (strain 168) GN=sufB PE=3 SV=1//0 && PF01458:Uncharacterized protein family (UPF0051)	0.836762	0.00170973	0.84351	0.000385107
CGTRNA_RS07845	cg1765	cg1765	1654358	1655044	687	-//- && PF01022:Bacterial regulatory protein, arsR family	0.789487	0.00081711	0.733297	0.00118052
CGTRNA_RS07855	cg1767	cg1767	1657148	1658170	1023	sp|O07016|YVFR_BACSU Uncharacterized ABC transporter ATP-binding protein YvfR OS=Bacillus subtilis (strain 168) GN=yvfR PE=3 SV=1//1.81196e-54 && PF00005:ABC transporter	-1.82135	9.45726e-11	-0.856798	0.00234699
CGTRNA_RS07860	cg1768	cg1768	1658179	1658985	807	-//- && PF12698:ABC-2 family transporter protein	-2.93956	1.96559e-25	-1.60028	4.31817e-08
CGTRNA_RS07865	cg1769	ctaA	1659105	1660145	1041	sp|P94346|CTAA_GEOSE Heme A synthase OS=Geobacillus stearothermophilus GN=ctaA PE=1 SV=3//7.83115e-06 && PF02628:Cytochrome oxidase assembly protein	-3.15972	1.80579e-58	-1.76222	4.5951e-14
CGTRNA_RS07885	cg1774	tkt	1665879	1667972	2094	sp|P46708|TKT_MYCLE Transketolase OS=Mycobacterium leprae (strain TN) GN=tkt PE=3 SV=1//0 && PF00456:Transketolase, thiamine diphosphate binding domain|PF02780:Transketolase, C-terminal domain|PF02779:Transketolase, pyrimidine binding domain	-0.503888	0.00151272	-0.479367	0.0309107
CGTRNA_RS07890	cg1776	tal	1668140	1669222	1083	sp|Q741B5|TAL_MYCPA Transaldolase OS=Mycobacterium paratuberculosis (strain ATCC BAA-968 / K-10) GN=tal PE=3 SV=1//2.67889e-159 && PF00923:Transaldolase/Fructose-6-phosphate aldolase	-0.684252	5.67382e-05	-0.662651	0.00306718
CGTRNA_RS07900	cg1779	opcA	1670886	1671845	960	-//- && PF10128:Glucose-6-phosphate dehydrogenase subunit	-1.20843	1.96025e-05	0.889405	0.00135373
CGTRNA_RS07935	cg1786	secG	1678513	1678746	234	sp|Q9Z469|SECG_CORGL Protein-export membrane protein SecG OS=Corynebacterium glutamicum (strain ATCC 13032 / DSM 20300 / JCM 1318 / LMG 3730 / NCIMB 10025) GN=secG PE=3 SV=1//5.47494e-28 && PF03840:Preprotein translocase SecG subunit	-0.9902	5.72932e-08	-1.65763	4.13207e-14
CGTRNA_RS07940	cg1787	ppc	1678851	1681610	2760	sp|P12880|CAPP_CORGL Phosphoenolpyruvate carboxylase OS=Corynebacterium glutamicum (strain ATCC 13032 / DSM 20300 / JCM 1318 / LMG 3730 / NCIMB 10025) GN=ppc PE=1 SV=4//0 && PF00311:Phosphoenolpyruvate carboxylase	-2.02947	5.16486e-18	-1.60115	7.95989e-14
CGTRNA_RS07945	cg1789	tpi	1681797	1682576	780	sp|P19583|TPIS_CORGL Triosephosphate isomerase OS=Corynebacterium glutamicum (strain ATCC 13032 / DSM 20300 / JCM 1318 / LMG 3730 / NCIMB 10025) GN=tpiA PE=3 SV=3//5.34905e-180 && PF00121:Triosephosphate isomerase	-1.3638	7.83982e-10	-0.942196	1.7305e-05
CGTRNA_RS07950	cg1790	pgk	1682655	1683872	1218	sp|Q01655|PGK_CORGL Phosphoglycerate kinase OS=Corynebacterium glutamicum (strain ATCC 13032 / DSM 20300 / JCM 1318 / LMG 3730 / NCIMB 10025) GN=pgk PE=3 SV=2//0 && PF00162:Phosphoglycerate kinase	-1.16295	1.08391e-07	-1.26815	7.64388e-09
CGTRNA_RS07955	cg1791	gap	1684089	1685093	1005	sp|Q01651|G3P_CORGL Glyceraldehyde-3-phosphate dehydrogenase OS=Corynebacterium glutamicum (strain ATCC 13032 / DSM 20300 / JCM 1318 / LMG 3730 / NCIMB 10025) GN=gap PE=3 SV=2//0 && PF00044:Glyceraldehyde 3-phosphate dehydrogenase, NAD binding domain|PF02800:Glyceraldehyde 3-phosphate dehydrogenase, C-terminal domain	-1.2392	4.30469e-08	-1.48585	1.53238e-10
CGTRNA_RS07965	cg1793	cg1793	1686575	1687600	1026	sp|Q9CCN9|GNGF_MYCLE Putative gluconeogenesis factor OS=Mycobacterium leprae (strain TN) GN=ML0564 PE=3 SV=1//2.55363e-107 && PF01933:Uncharacterised protein family UPF0052	0.745914	0.000177394	0.67032	0.00478904
CGTRNA_RS07970	cg1794	cg1794	1687617	1688546	930	sp|A4QEG5|Y1639_CORGB Nucleotide-binding protein cgR_1639 OS=Corynebacterium glutamicum (strain R) GN=cgR_1639 PE=3 SV=1//0 && PF03668:P-loop ATPase protein family	0.914481	5.87099e-08	-0.781235	0.00102137
CGTRNA_RS08000	cg1800	ribG	1693740	1694726	987	sp|O24750|RIBD_CORAM Riboflavin biosynthesis protein RibD OS=Corynebacterium ammoniagenes GN=ribD PE=3 SV=1//6.45172e-89 && PF00383:Cytidine and deoxycytidylate deaminase zinc-binding region|PF01872:RibD C-terminal domain	-1.05433	5.2634e-07	-0.714707	0.0025173
CGTRNA_RS08005	cg1801	rpe	1694727	1695386	660	sp|P9WI51|RPE_MYCTU Ribulose-phosphate 3-epimerase OS=Mycobacterium tuberculosis (strain ATCC 25618 / H37Rv) GN=rpe PE=1 SV=1//5.36386e-72 && PF00834:Ribulose-phosphate 3 epimerase family	-1.15013	2.08931e-10	-0.714418	0.00197547
CGTRNA_RS08015	cg1803	fmt	1696964	1697911	948	sp|Q8NQ47|FMT_CORGL Methionyl-tRNA formyltransferase OS=Corynebacterium glutamicum (strain ATCC 13032 / DSM 20300 / JCM 1318 / LMG 3730 / NCIMB 10025) GN=fmt PE=3 SV=1//0 && PF02911:Formyl transferase, C-terminal domain|PF00551:Formyl transferase	0.648235	0.000851704	1.59564	8.73463e-13
CGTRNA_RS08020	cg1804	def2	1697931	1698440	510	sp|Q8NQ46|DEF1_CORGL Peptide deformylase 1 OS=Corynebacterium glutamicum (strain ATCC 13032 / DSM 20300 / JCM 1318 / LMG 3730 / NCIMB 10025) GN=def1 PE=3 SV=1//1.7212e-122 && PF01327:Polypeptide deformylase	0.945934	1.77174e-06	1.01221	6.01412e-05
CGTRNA_RS08030	cg1806	metK	1700642	1701865	1224	sp|Q9K5E4|METK_CORGL S-adenosylmethionine synthase OS=Corynebacterium glutamicum (strain ATCC 13032 / DSM 20300 / JCM 1318 / LMG 3730 / NCIMB 10025) GN=metK PE=3 SV=1//0 && PF00438:S-adenosylmethionine synthetase, N-terminal domain|PF02773:S-adenosylmethionine synthetase, C-terminal domain|PF02772:S-adenosylmethionine synthetase, central domain	1.46553	5.21527e-10	1.1493	7.42745e-06
CGTRNA_RS08040	cg1809	cg1809	1703497	1703784	288	sp|Q8NQ43|RPOZ_CORGL DNA-directed RNA polymerase subunit omega OS=Corynebacterium glutamicum (strain ATCC 13032 / DSM 20300 / JCM 1318 / LMG 3730 / NCIMB 10025) GN=rpoZ PE=3 SV=1//3.14646e-65 && PF01192:RNA polymerase Rpb6	0.44896	0.0394223	-0.96067	0.000164587
CGTRNA_RS08055	cg1812	pyrF	1704982	1705818	837	sp|Q8NQ40|PYRF_CORGL Orotidine 5&apos;-phosphate decarboxylase OS=Corynebacterium glutamicum (strain ATCC 13032 / DSM 20300 / JCM 1318 / LMG 3730 / NCIMB 10025) GN=pyrF PE=3 SV=1//0 && PF00215:Orotidine 5'-phosphate decarboxylase / HUMPS family	-1.95726	9.27192e-13	1.68737	2.58943e-11
CGTRNA_RS08060	cg1813	carB	1705824	1709165	3342	sp|P58939|CARB_CORGL Carbamoyl-phosphate synthase large chain OS=Corynebacterium glutamicum (strain ATCC 13032 / DSM 20300 / JCM 1318 / LMG 3730 / NCIMB 10025) GN=carB PE=3 SV=1//0 && PF02787:Carbamoyl-phosphate synthetase large chain, oligomerisation domain|PF02142:MGS-like domain|PF02786:Carbamoyl-phosphate synthase L chain, ATP binding domain	-1.25684	2.14625e-12	1.82734	1.46053e-17
CGTRNA_RS08065	cg1814	carA	1709171	1710352	1182	sp|P58893|CARA_CORGL Carbamoyl-phosphate synthase small chain OS=Corynebacterium glutamicum (strain ATCC 13032 / DSM 20300 / JCM 1318 / LMG 3730 / NCIMB 10025) GN=carA PE=3 SV=1//0 && PF00117:Glutamine amidotransferase class-I|PF00988:Carbamoyl-phosphate synthase small chain, CPSase domain	-0.778226	0.000203472	1.11285	1.29242e-06
CGTRNA_RS08070	cg1815	pyrC	1710482	1711825	1344	sp|Q8NQ39|PYRC_CORGL Dihydroorotase OS=Corynebacterium glutamicum (strain ATCC 13032 / DSM 20300 / JCM 1318 / LMG 3730 / NCIMB 10025) GN=pyrC PE=3 SV=1//0 && PF01979:Amidohydrolase family	-0.488498	0.010061	0.902824	9.02215e-05
CGTRNA_RS08080	cg1817	pyrR	1712817	1713395	579	sp|P59011|PYRR_CORGL Bifunctional protein PyrR OS=Corynebacterium glutamicum (strain ATCC 13032 / DSM 20300 / JCM 1318 / LMG 3730 / NCIMB 10025) GN=pyrR PE=3 SV=1//8.2321e-135 && PF00156:Phosphoribosyl transferase domain	1.2305	1.69506e-11	-0.836085	0.000376818
CGTRNA_RS08100	cg1823	cg1823	1716233	1716421	189	-//- && -	1.30454	5.32327e-10	0.970722	0.000310565
CGTRNA_RS08110	cg1825	efp	1717598	1718161	564	sp|Q45288|EFP_CORGL Elongation factor P OS=Corynebacterium glutamicum (strain ATCC 13032 / DSM 20300 / JCM 1318 / LMG 3730 / NCIMB 10025) GN=efp PE=3 SV=2//8.69802e-136 && PF01132:Elongation factor P (EF-P) OB domain|PF09285:Elongation factor P, C-terminal|PF08207:Elongation factor P (EF-P) KOW-like domain	-0.53181	0.0103731	-1.16829	3.09513e-05
CGTRNA_RS08115	cg1826	pepQ	1718246	1719337	1092	sp|P54518|YQHT_BACSU Uncharacterized peptidase YqhT OS=Bacillus subtilis (strain 168) GN=yqhT PE=3 SV=1//2.19781e-78 && PF00557:Metallopeptidase family M24|PF01321:Creatinase/Prolidase N-terminal domain	1.21364	8.44384e-07	0.703223	0.0266247
CGTRNA_RS08120	cg1827	aroB	1719404	1720501	1098	sp|Q9X5D2|AROB_CORGL 3-dehydroquinate synthase OS=Corynebacterium glutamicum (strain ATCC 13032 / DSM 20300 / JCM 1318 / LMG 3730 / NCIMB 10025) GN=aroB PE=3 SV=2//0 && PF01761:3-dehydroquinate synthase	-1.3325	9.56481e-06	0.840693	0.0231433
CGTRNA_RS08125	cg1828	aroK	1720573	1721145	573	sp|Q9X5D1|AROK_CORGL Shikimate kinase OS=Corynebacterium glutamicum (strain ATCC 13032 / DSM 20300 / JCM 1318 / LMG 3730 / NCIMB 10025) GN=aroK PE=3 SV=1//5.89979e-106 && PF01202:Shikimate kinase	-1.81314	4.74804e-10	0.83761	0.0100639
CGTRNA_RS08160	cg1835	aroE3	1726078	1726908	831	sp|C7GIN5|ARO1_YEAS2 Pentafunctional AROM polypeptide OS=Saccharomyces cerevisiae (strain JAY291) GN=ARO1 PE=3 SV=1//5.33761e-34 && PF01488:Shikimate / quinate 5-dehydrogenase|PF08501:Shikimate dehydrogenase substrate binding domain	1.33638	1.69155e-05	1.90449	2.84744e-11
CGTRNA_RS08165	cg1836	cg1836	1726925	1728094	1170	sp|O34758|YRRL_BACSU UPF0755 protein YrrL OS=Bacillus subtilis (strain 168) GN=yrrL PE=3 SV=1//1.55416e-25 && PF02618:YceG-like family	1.31483	2.28503e-07	1.08153	0.00030137
CGTRNA_RS08170	cg1837	cg1837	1728091	1728639	549	sp|Q8NQ23|RUVX_CORGL Putative Holliday junction resolvase OS=Corynebacterium glutamicum (strain ATCC 13032 / DSM 20300 / JCM 1318 / LMG 3730 / NCIMB 10025) GN=Cgl1631 PE=3 SV=1//2.67017e-129 && PF03652:Holliday junction resolvase	1.4678	1.52087e-06	0.785848	0.0196484
CGTRNA_RS08175	cg1838	alaS	1728851	1731517	2667	sp|Q8NQ22|SYA_CORGL Alanine--tRNA ligase OS=Corynebacterium glutamicum (strain ATCC 13032 / DSM 20300 / JCM 1318 / LMG 3730 / NCIMB 10025) GN=alaS PE=3 SV=1//0 && PF01411:tRNA synthetases class II (A)|PF07973:Threonyl and Alanyl tRNA synthetase second additional domain|PF02272:DHHA1 domain	-0.953811	2.99599e-08	1.12137	1.25671e-06
CGTRNA_RS08195	cg1842	cg1842	1736513	1737418	906	sp|P65020|Y2605_MYCBO Uncharacterized protein Mb2605 OS=Mycobacterium bovis (strain ATCC BAA-935 / AF2122/97) GN=Mb2605 PE=4 SV=1//2.05502e-62 && PF04228:Putative neutral zinc metallopeptidase	-1.27062	2.6007e-08	-1.02386	3.14446e-05
CGTRNA_RS08240	cg1852	sdaA	1746353	1747702	1350	sp|O86564|SDHL_STRCO L-serine dehydratase OS=Streptomyces coelicolor (strain ATCC BAA-471 / A3(2) / M145) GN=sdaA PE=3 SV=1//8.34469e-126 && PF03315:Serine dehydratase beta chain|PF03313:Serine dehydratase alpha chain	1.00994	8.78318e-05	-0.95366	0.00225048
CGTRNA_RS08250	cg1855	hisS	1749456	1750745	1290	sp|Q8NQ07|SYH_CORGL Histidine--tRNA ligase OS=Corynebacterium glutamicum (strain ATCC 13032 / DSM 20300 / JCM 1318 / LMG 3730 / NCIMB 10025) GN=hisS PE=3 SV=1//0 && PF03129:Anticodon binding domain|PF13393:Histidyl-tRNA synthetase	-1.05074	6.47372e-09	-0.628242	0.00840133
CGTRNA_RS08255	cg1856	cg1856	1750791	1751432	642	sp|P64262|Y2612_MYCBO Uncharacterized protein Mb2612c OS=Mycobacterium bovis (strain ATCC BAA-935 / AF2122/97) GN=Mb2612c PE=3 SV=1//5.72608e-37 && PF00753:Metallo-beta-lactamase superfamily	-1.05455	5.23104e-05	-1.89408	8.24129e-10
CGTRNA_RS08265	cg1859	cg1859	1752966	1753523	558	sp|Q8NQ03|Y1651_CORGL Uncharacterized protein Cgl1651/cg1859 OS=Corynebacterium glutamicum (strain ATCC 13032 / DSM 20300 / JCM 1318 / LMG 3730 / NCIMB 10025) GN=Cgl1651 PE=1 SV=1//1.42022e-114 && -	-3.89192	7.65062e-82	-2.08822	3.73445e-22
CGTRNA_RS08270	cg1860	cg1860	1753725	1754000	276	-//- && -	-2.35094	9.82383e-12	-1.93876	3.52025e-08
CGTRNA_RS08290	cg1865	secF	1759058	1760269	1212	sp|P9WGN9|SECF_MYCTU Protein translocase subunit SecF OS=Mycobacterium tuberculosis (strain ATCC 25618 / H37Rv) GN=secF PE=1 SV=1//4.20525e-107 && PF02355:Protein export membrane protein	0.962748	0.00067453	2.04221	2.79529e-13
CGTRNA_RS08300	cg1868	secN	1762474	1762839	366	sp|Q49647|Y486_MYCLE Uncharacterized protein ML0486 OS=Mycobacterium leprae (strain TN) GN=ML0486 PE=3 SV=2//3.93961e-14 && PF02699:Preprotein translocase subunit	-1.09663	1.18185e-06	-1.94473	1.76893e-11
CGTRNA_RS08305	cg1869	ruvB	1762888	1763979	1092	sp|A4QEN3|RUVB_CORGB Holliday junction ATP-dependent DNA helicase RuvB OS=Corynebacterium glutamicum (strain R) GN=ruvB PE=3 SV=1//0 && PF05496:Holliday junction DNA helicase ruvB N-terminus|PF05491:Holliday junction DNA helicase ruvB C-terminus	0.618728	0.0145548	1.20231	1.32815e-05
CGTRNA_RS08310	cg1870	ruvA	1763986	1764606	621	sp|Q9AE10|RUVA_CORGL Holliday junction ATP-dependent DNA helicase RuvA OS=Corynebacterium glutamicum (strain ATCC 13032 / DSM 20300 / JCM 1318 / LMG 3730 / NCIMB 10025) GN=ruvA PE=3 SV=1//1.61018e-135 && PF01330:RuvA N terminal domain|PF14520:Helix-hairpin-helix domain|PF07499:RuvA, C-terminal domain	1.29118	4.12357e-05	1.16278	0.000536027
CGTRNA_RS08315	cg1871	ruvC	1764646	1765311	666	sp|Q9AE11|RUVC_CORGL Crossover junction endodeoxyribonuclease RuvC OS=Corynebacterium glutamicum (strain ATCC 13032 / DSM 20300 / JCM 1318 / LMG 3730 / NCIMB 10025) GN=ruvC PE=3 SV=1//1.50798e-165 && PF02075:Crossover junction endodeoxyribonuclease RuvC	1.74869	1.53347e-10	0.722128	0.0398285
CGTRNA_RS08330	cg1874	cg1874	1767441	1767917	477	sp|O54101|MMPLB_STRCO Putative membrane protein SCO5905 OS=Streptomyces coelicolor (strain ATCC BAA-471 / A3(2) / M145) GN=SCO5905 PE=3 SV=1//6.05006e-06 && PF12823:Domain of unknown function (DUF3817)	-0.789114	0.00195291	-0.836268	0.0155604
CGTRNA_RS08365	cg1881	cg1881	1774127	1775335	1209	sp|P39597|EFEN_BACSU Probable deferrochelatase/peroxidase EfeN OS=Bacillus subtilis (strain 168) GN=efeN PE=1 SV=1//6.50841e-57 && PF04261:Dyp-type peroxidase family	-2.20917	1.78935e-26	-1.54874	2.68079e-09
CGTRNA_RS08370	cg1883	cg1883	1775362	1775910	549	sp|Q6ACU3|Y2102_LEIXX Putative lipoprotein Lxx21020 OS=Leifsonia xyli subsp. xyli (strain CTCB07) GN=Lxx21020 PE=3 SV=2//5.56928e-21 && PF04314:Copper chaperone PCu(A)C	-2.45885	6.4969e-36	-2.22947	1.09186e-20
CGTRNA_RS08375	cg1884	cg1884	1775926	1776546	621	-//- && PF04234:CopC domain	-2.3885	2.64892e-29	-2.71379	6.59392e-27
CGTRNA_RS08435	cg1894	cg1894	1783396	1784265	870	-//- && -	-0.898554	0.00485715	-2.92193	1.13804e-13
CGTRNA_RS08450	cg1897	cg1897	1788376	1790301	1926	-//- && -	-0.798566	0.0113983	-2.14714	2.30122e-08
CGTRNA_RS08470	cg1901	cg1901	1791930	1792274	345	-//- && -	1.24886	4.91739e-06	1.31654	7.08078e-05
CGTRNA_RS08475	cg1903	cg1903	1793314	1793913	600	sp|P37494|YYBJ_BACSU Uncharacterized ABC transporter ATP-binding protein YybJ OS=Bacillus subtilis (strain 168) GN=yybJ PE=3 SV=1//1.37889e-25 && PF00005:ABC transporter	-0.694022	0.000803971	-1.76745	5.95425e-12
CGTRNA_RS08480	cg1904	cg1904	1793900	1794901	1002	-//- && -	-1.0106	2.75761e-07	-1.04359	3.09499e-05
CGTRNA_RS08485	cg1905	cg1905	1795186	1796295	1110	-//- && -	-2.62166	2.07159e-65	-2.33381	1.2281e-21
CGTRNA_RS08490	cg1906	cg1906	1796296	1797096	801	-//- && -	-4.01376	4.75271e-35	-1.73804	7.94665e-12
CGTRNA_RS08495	cg1907	cg1907	1797063	1797656	594	sp|E5KIB9|CYPD_STRSQ Cypemycin cysteine dehydrogenase (decarboxylating) OS=Streptomyces sp. GN=cypD PE=1 SV=1//2.80137e-08 && PF02441:Flavoprotein	-3.2077	8.60646e-20	-0.979496	0.000639166
CGTRNA_RS08500	cg1908	cg1908	1797682	1798524	843	-//- && -	-3.15124	1.0639e-35	-1.07253	4.42765e-05
CGTRNA_RS08510	cg1911	cg1911	1799492	1800229	738	-//- && -	-1.57903	3.73904e-22	-3.88122	1.69072e-57
CGTRNA_RS08615	cg1935	cg1935	1815252	1815992	741	sp|P31460|DGOR_ECOLI Galactonate operon transcriptional repressor OS=Escherichia coli (strain K12) GN=dgoR PE=3 SV=4//4.13822e-15 && PF00392:Bacterial regulatory proteins, gntR family|PF07729:FCD domain	-1.66252	4.17715e-13	-2.20569	5.00586e-15
CGTRNA_RS08645	cg1943	cg1943	1820270	1820641	372	-//- && -	-0.808563	0.00134634	-2.03637	7.38626e-11
CGTRNA_RS08700	cg1957	cg1957	1835618	1836400	783	-//- && -	1.71889	0.00861882	1.39555	0.0448187
CGTRNA_RS08890	cg1998	cglIIR	1881962	1883860	1899	-//- && PF10593:Z1 domain	-1.69166	8.43846e-08	0.931008	0.00127102
CGTRNA_RS08895	cg1999	cg1999	1883939	1885462	1524	-//- && -	1.4244	5.13707e-09	-1.1651	0.00319803
CGTRNA_RS08905	cg2001	cg2001	1886702	1888522	1821	-//- && PF14311:Probable Zinc-ribbon domain	-0.662851	0.00899503	-0.67074	0.0139823
CGTRNA_RS08910	cg2002	cg2002	1888877	1889065	189	-//- && -	-1.5132	0.000704242	-1.95863	4.55663e-05
CGTRNA_RS08920	cg2004	cg2004	1889700	1890566	867	-//- && -	-0.847758	0.0309832	1.40669	0.00023672
CGTRNA_RS08940	cg2008	cg2008	1896208	1898703	2496	-//- && -	0.744423	0.0351282	-1.15585	0.0149324
CGTRNA_RS09020	cg2025	cg2025	1917900	1918208	309	-//- && -	-0.758002	0.00310125	-3.00202	1.75364e-25
CGTRNA_RS09025	cg2026	cg2026	1918416	1918640	225	-//- && PF09954:Uncharacterized protein conserved in bacteria (DUF2188)	-1.55345	3.0896e-17	-2.26122	3.67834e-24
CGTRNA_RS09030	cg2027	cg2027	1918798	1918986	189	-//- && -	-1.34343	0.00041938	-1.10645	0.00485877
CGTRNA_RS09060	cg2034	cg2034	1928714	1929661	948	-//- && -	-1.1401	2.08931e-10	-2.31794	1.30839e-22
CGTRNA_RS09085	cg2039	cg2039	1932890	1933360	471	-//- && -	-1.71246	5.80282e-15	-1.80652	7.0979e-11
CGTRNA_RS09090	cg2040	cg2040	1933404	1933787	384	sp|P9WJA7|HIGA1_MYCTU Antitoxin HigA1 OS=Mycobacterium tuberculosis (strain ATCC 25618 / H37Rv) GN=higA1 PE=1 SV=1//8.94158e-13 && PF01381:Helix-turn-helix	-2.33368	3.34399e-24	-2.5337	1.06325e-20
CGTRNA_RS09105	cg2043	cg2043	1936440	1937384	945	sp|Q57601|Y137_METJA Uncharacterized protein MJ0137 OS=Methanocaldococcus jannaschii (strain ATCC 43067 / DSM 2661 / JAL-1 / JCM 10045 / NBRC 100440) GN=MJ0137 PE=4 SV=1//6.78511e-18 && PF01972:Serine dehydrogenase proteinase	-0.744684	2.17199e-05	-2.37442	1.78189e-26
CGTRNA_RS09120	cg2047	cg2047	1938955	1939209	255	-//- && -	-1.38271	2.35547e-06	-1.41823	9.30825e-05
CGTRNA_RS09140	cg2051	cg2051	1942579	1943025	447	-//- && -	-1.02194	6.99005e-05	-2.31502	2.5912e-12
CGTRNA_RS09195	cg2061	psp3	1948539	1950122	1584	sp|P0C1D6|CSP1_CORGL Protein PS1 OS=Corynebacterium glutamicum (strain ATCC 13032 / DSM 20300 / JCM 1318 / LMG 3730 / NCIMB 10025) GN=csp1 PE=3 SV=1//1.23802e-12 && PF08310:LGFP repeat	-1.62819	2.11027e-09	-1.46718	9.91044e-06
CGTRNA_RS09275	cg2076	ribD	1967593	1968291	699	-//- && PF01872:RibD C-terminal domain	-1.45652	1.71335e-10	-0.719146	0.00478904
CGTRNA_RS09290	cg2079	cg2079	1970566	1971264	699	sp|A0QW25|Y2782_MYCS2 Uncharacterized protein MSMEG_2782/MSMEI_2713 OS=Mycobacterium smegmatis (strain ATCC 700084 / mc(2)155) GN=MSMEG_2782 PE=1 SV=1//2.43735e-93 && PF06778:Chlorite dismutase	-1.59681	5.49164e-09	-1.87869	2.5456e-19
CGTRNA_RS09295	cg2080	cg2080	1971546	1972163	618	-//- && PF11452:Protein of unknown function (DUF3000)	-1.19042	5.17122e-11	0.679608	0.00535898
CGTRNA_RS09310	cg2084	cg2084	1975507	1976745	1239	sp|Q6M4B7|Y1903_CORGL Uncharacterized RNA methyltransferase Cgl1903/cg2084 OS=Corynebacterium glutamicum (strain ATCC 13032 / DSM 20300 / JCM 1318 / LMG 3730 / NCIMB 10025) GN=Cgl1903 PE=3 SV=1//0 && PF01938:TRAM domain|PF05958:tRNA (Uracil-5-)-methyltransferase	0.470184	0.0155383	0.597842	0.0126305
CGTRNA_RS09320	cg2086	dut	1977783	1978232	450	sp|Q8NPA9|DUT_CORGL Deoxyuridine 5&apos;-triphosphate nucleotidohydrolase OS=Corynebacterium glutamicum (strain ATCC 13032 / DSM 20300 / JCM 1318 / LMG 3730 / NCIMB 10025) GN=dut PE=3 SV=1//2.96806e-89 && PF00692:dUTPase	0.7274	0.00435338	-0.762293	0.0310413
CGTRNA_RS09325	cg2087	cg2087	1978298	1978849	552	-//- && PF11292:Protein of unknown function (DUF3093)	-0.612188	0.0188554	-0.59049	0.0452868
CGTRNA_RS09330	cg2088	cg2088	1978921	1979130	210	-//- && -	1.89794	6.93898e-12	-1.2646	0.00369459
CGTRNA_RS09335	cg2089	cg2089	1979325	1979618	294	-//- && PF13834:Domain of unknown function (DUF4193)	2.11852	2.0918e-27	-0.87741	0.00197069
CGTRNA_RS09340	cg2090	suhB	1979769	1980611	843	sp|P46813|SUHB_MYCLE Inositol-1-monophosphatase OS=Mycobacterium leprae (strain TN) GN=suhB PE=3 SV=1//2.5451e-51 && PF00459:Inositol monophosphatase family	-1.11644	5.87881e-07	-1.49095	2.19576e-10
CGTRNA_RS09345	cg2091	ppgK	1980681	1981433	753	sp|P9WIN0|PPGK_MYCTO Polyphosphate glucokinase OS=Mycobacterium tuberculosis (strain CDC 1551 / Oshkosh) GN=ppgK PE=3 SV=1//4.04582e-78 && PF00480:ROK family	0.874794	1.38277e-07	-0.791275	0.000845593
CGTRNA_RS09355	cg2095	cg2095	1984207	1985544	1338	-//- && PF04235:Protein of unknown function (DUF418)	1.50101	2.24863e-10	1.38519	1.18564e-06
CGTRNA_RS09385	cg2101	cg2101	1990341	1990775	435	sp|Q8NP96|DTD_CORGL D-aminoacyl-tRNA deacylase OS=Corynebacterium glutamicum (strain ATCC 13032 / DSM 20300 / JCM 1318 / LMG 3730 / NCIMB 10025) GN=dtd PE=3 SV=1//8.6947e-90 && PF02580:D-Tyr-tRNA(Tyr) deacylase	-0.813354	0.033877	0.953678	0.00283733
CGTRNA_RS09410	cg2106	cg2106	1995471	1996430	960	-//- && PF09754:PAC2 family	0.861437	4.17893e-06	-0.687049	0.00490028
CGTRNA_RS09420	cg2109	oxyR	1999225	2000208	984	sp|P52678|OXYR_MYCLE Probable hydrogen peroxide-inducible genes activator OS=Mycobacterium leprae (strain TN) GN=oxyR PE=3 SV=1//1.66028e-85 && PF00126:Bacterial regulatory helix-turn-helix protein, lysR family|PF03466:LysR substrate binding domain	-1.18274	2.09417e-07	0.939096	0.000159633
CGTRNA_RS09430	cg2111	hrpA	2001526	2005434	3909	sp|P43329|HRPA_ECOLI ATP-dependent RNA helicase HrpA OS=Escherichia coli (strain K12) GN=hrpA PE=3 SV=3//0 && PF07717:Oligonucleotide/oligosaccharide-binding (OB)-fold|PF04408:Helicase associated domain (HA2)|PF00271:Helicase conserved C-terminal domain|PF11898:Domain of unknown function (DUF3418)|PF00270:DEAD/DEAH box helicase	-0.851707	2.46907e-05	1.02427	9.55172e-06
CGTRNA_RS09435	cg2112	cg2112	2005476	2005928	453	sp|Q8NP88|NRDR_CORGL Transcriptional repressor NrdR OS=Corynebacterium glutamicum (strain ATCC 13032 / DSM 20300 / JCM 1318 / LMG 3730 / NCIMB 10025) GN=nrdR PE=3 SV=1//1.06289e-105 && PF03477:ATP cone domain	-0.631047	0.0322375	-1.24765	0.000268501
CGTRNA_RS09460	cg2117	ptsI	2009664	2011370	1707	sp|Q9KZP1|PT1_STRCO Phosphoenolpyruvate-protein phosphotransferase OS=Streptomyces coelicolor (strain ATCC BAA-471 / A3(2) / M145) GN=ptsI PE=3 SV=1//2.62079e-117 && PF02896:PEP-utilising enzyme, TIM barrel domain|PF00391:PEP-utilising enzyme, mobile domain|PF05524:PEP-utilising enzyme, N-terminal	-1.32235	1.97177e-17	-0.808405	0.000345516
CGTRNA_RS09470	cg2119	pfkB	2012568	2013560	993	sp|P0AEX2|K1PF_SHIFL 1-phosphofructokinase OS=Shigella flexneri GN=fruK PE=3 SV=1//9.96142e-29 && PF00294:pfkB family carbohydrate kinase	-1.65299	2.74928e-10	0.593449	0.00972615
CGTRNA_RS09475	cg2120	ptsF	2013557	2015623	2067	sp|P71012|PTF3A_BACSU PTS system fructose-specific EIIABC component OS=Bacillus subtilis (strain 168) GN=fruA PE=1 SV=2//3.70563e-81 && PF02302:PTS system, Lactose/Cellobiose specific IIB subunit|PF00359:Phosphoenolpyruvate-dependent sugar phosphotransferase system, EIIA 2	-1.52257	1.66199e-16	0.945506	1.11513e-05
CGTRNA_RS09485	cg2124	cg2124	2016760	2017287	528	-//- && -	0.781256	0.00612815	-0.96676	0.00916458
CGTRNA_RS09495	cg2126	cg2126	2018696	2020225	1530	sp|D9R4W7|HFLX_CLOSW GTPase HflX OS=Clostridium saccharolyticum (strain ATCC 35040 / DSM 2544 / NRCC 2533 / WM1) GN=hflX PE=3 SV=1//2.56494e-84 && PF16360:GTP-binding GTPase Middle Region|PF01926:50S ribosome-binding GTPase|PF13167:GTP-binding GTPase N-terminal	-0.553753	0.00498663	0.543018	0.0334047
CGTRNA_RS09500	cg2127	cg2127	2020400	2021158	759	-//- && -	-2.1713	4.00314e-16	-1.86666	1.30931e-11
CGTRNA_RS09515	cg2130	miaA	2022730	2023635	906	sp|Q8NP72|MIAA_CORGL tRNA dimethylallyltransferase OS=Corynebacterium glutamicum (strain ATCC 13032 / DSM 20300 / JCM 1318 / LMG 3730 / NCIMB 10025) GN=miaA PE=3 SV=1//0 && PF01715:IPP transferase	-0.806951	0.00175591	1.18364	7.55542e-05
CGTRNA_RS09535	cg2134	cg2134	2027166	2027837	672	-//- && -	-1.34494	1.19388e-10	-0.505747	0.0315094
CGTRNA_RS09540	cg2135	miaB	2027901	2029481	1581	sp|A4QEV7|MIAB_CORGB tRNA-2-methylthio-N(6)-dimethylallyladenosine synthase OS=Corynebacterium glutamicum (strain R) GN=miaB PE=3 SV=1//0 && PF04055:Radical SAM superfamily|PF00919:Uncharacterized protein family UPF0004	-0.686874	0.0133482	0.987836	4.29911e-05
CGTRNA_RS09590	cg2148	cg2148	2037226	2037918	693	sp|Q7N0N3|Y3849_PHOLL Putative ABC transporter ATP-binding protein plu3849 OS=Photorhabdus luminescens subsp. laumondii (strain TT01) GN=plu3849 PE=3 SV=1//1.27654e-68 && PF00005:ABC transporter	-0.865689	0.0142698	-0.954638	0.0201822
CGTRNA_RS09605	cg2152	cg2152	2039662	2039985	324	sp|A0QVU1|CLGR_MYCS2 Transcriptional regulator ClgR OS=Mycobacterium smegmatis (strain ATCC 700084 / mc(2)155) GN=clgR PE=2 SV=1//1.91251e-21 && PF13560:Helix-turn-helix domain	0.688951	0.000955679	-1.08674	4.29911e-05
CGTRNA_RS09610	cg2153	cg2153	2040043	2040561	519	sp|A0AIJ9|CINA_LISW6 Putative competence-damage inducible protein OS=Listeria welshimeri serovar 6b (strain ATCC 35897 / DSM 20650 / SLCC5334) GN=cinA PE=3 SV=1//1.72208e-33 && PF02464:Competence-damaged protein	1.15518	0.000810745	1.32705	8.18863e-05
CGTRNA_RS09620	cg2155	cg2155	2041364	2041651	288	-//- && PF03795:YCII-related domain	-1.86092	3.92924e-21	-3.45281	6.28529e-36
CGTRNA_RS09635	cg2158	ftsK	2043341	2046220	2880	sp|Q8NP53|FTSK_CORGL DNA translocase FtsK OS=Corynebacterium glutamicum (strain ATCC 13032 / DSM 20300 / JCM 1318 / LMG 3730 / NCIMB 10025) GN=ftsK PE=3 SV=1//0 && PF09397:Ftsk gamma domain|PF13491:4TM region of DNA translocase FtsK/SpoIIIE|PF01580:FtsK/SpoIIIE family	-0.541849	0.00145043	0.79561	0.000407442
CGTRNA_RS09665	cg2165	cg2165	2052165	2052866	702	-//- && -	-0.739521	7.94443e-05	-1.55083	8.51558e-11
CGTRNA_RS09675	cg2167	rpsO	2055483	2055752	270	sp|Q8NP49|RS15_CORGL 30S ribosomal protein S15 OS=Corynebacterium glutamicum (strain ATCC 13032 / DSM 20300 / JCM 1318 / LMG 3730 / NCIMB 10025) GN=rpsO PE=3 SV=1//8.34714e-46 && PF00312:Ribosomal protein S15	0.384988	0.0418983	0.70684	0.00689278
CGTRNA_RS09680	cg2168	iunH2	2055926	2056876	951	sp|Q6ZJ05|URH1_ORYSJ Probable uridine nucleosidase 1 OS=Oryza sativa subsp. japonica GN=URH1 PE=2 SV=1//1.18811e-51 && PF01156:Inosine-uridine preferring nucleoside hydrolase	0.533309	0.0103884	0.607639	0.0179643
CGTRNA_RS09690	cg2170	truB	2058023	2058916	894	sp|Q8NP46|TRUB_CORGL tRNA pseudouridine synthase B OS=Corynebacterium glutamicum (strain ATCC 13032 / DSM 20300 / JCM 1318 / LMG 3730 / NCIMB 10025) GN=truB PE=3 SV=1//0 && PF16198:tRNA pseudouridylate synthase B C-terminal domain|PF09142:tRNA Pseudouridine synthase II, C terminal|PF01509:TruB family pseudouridylate synthase (N terminal domain)	-1.09805	0.000129068	-1.22522	0.000248883
CGTRNA_RS09730	cg2178	nusA	2067427	2068425	999	sp|Q9Z5J1|NUSA_MYCLE Transcription termination/antitermination protein NusA OS=Mycobacterium leprae (strain TN) GN=nusA PE=3 SV=1//4.71066e-134 && PF13184:NusA-like KH domain	-0.420734	0.0403427	-1.36025	2.14187e-06
CGTRNA_RS09735	cg2179	cg2179	2068459	2068995	537	sp|Q8NP37|RIMP_CORGL Ribosome maturation factor RimP OS=Corynebacterium glutamicum (strain ATCC 13032 / DSM 20300 / JCM 1318 / LMG 3730 / NCIMB 10025) GN=rimP PE=3 SV=1//1.69426e-127 && PF17384:RimP C-terminal SH3 domain|PF02576:RimP N-terminal domain	-0.975539	9.94998e-06	-2.19427	2.87084e-16
CGTRNA_RS09745	cg2181	cg2181	2070290	2071894	1605	sp|P24141|OPPA_BACSU Oligopeptide-binding protein OppA OS=Bacillus subtilis (strain 168) GN=oppA PE=1 SV=1//7.41554e-28 && PF00496:Bacterial extracellular solute-binding proteins, family 5 Middle	2.4815	0.00199009	-1.88961	8.8566e-11
CGTRNA_RS09750	cg2182	cg2182	2072073	2072999	927	sp|P0AEF8|DPPB_ECOLI Dipeptide transport system permease protein DppB OS=Escherichia coli (strain K12) GN=dppB PE=1 SV=1//1.59441e-59 && PF00528:Binding-protein-dependent transport system inner membrane component	1.75301	0.000275921	-1.56296	0.000646576
CGTRNA_RS09765	cg2185	proS	2075848	2077614	1767	sp|Q8NP31|SYP_CORGL Proline--tRNA ligase OS=Corynebacterium glutamicum (strain ATCC 13032 / DSM 20300 / JCM 1318 / LMG 3730 / NCIMB 10025) GN=proS PE=3 SV=1//0 && PF03129:Anticodon binding domain|PF04073:Aminoacyl-tRNA editing domain|PF00587:tRNA synthetase class II core domain (G, H, P, S and T)	-0.561388	0.00428087	0.647111	0.0109368
CGTRNA_RS09785	cg2189	cobA	2080481	2081233	753	sp|Q46BL0|SUMT_METBF S-adenosyl-L-methionine-dependent uroporphyrinogen III methyltransferase OS=Methanosarcina barkeri (strain Fusaro / DSM 804) GN=Mbar_A1791 PE=1 SV=1//9.97483e-53 && PF00590:Tetrapyrrole (Corrin/Porphyrin) Methylases	-1.15794	8.51071e-05	-0.957519	0.00198581
CGTRNA_RS09800	cg2192	mqo	2083911	2085413	1503	sp|O69282|MQO_CORGL Malate:quinone oxidoreductase OS=Corynebacterium glutamicum (strain ATCC 13032 / DSM 20300 / JCM 1318 / LMG 3730 / NCIMB 10025) GN=mqo PE=1 SV=3//0 && PF06039:Malate:quinone oxidoreductase (Mqo)	-1.21534	2.87248e-14	-1.6412	5.2288e-11
CGTRNA_RS09805	cg2193	cg2193	2085811	2086827	1017	-//- && PF12146:Serine aminopeptidase, S33	-1.13512	2.96678e-08	-1.68906	8.31237e-11
CGTRNA_RS09810	cg2194	gor	2086966	2088363	1398	sp|P9WHH3|MTR_MYCTU Mycothione reductase OS=Mycobacterium tuberculosis (strain ATCC 25618 / H37Rv) GN=mtr PE=1 SV=1//4.55841e-163 && PF07992:Pyridine nucleotide-disulphide oxidoreductase|PF02852:Pyridine nucleotide-disulphide oxidoreductase, dimerisation domain	-1.0675	8.43846e-08	-0.755772	0.00198671
CGTRNA_RS09815	cg2195	cg2195	2088786	2089133	348	-//- && -	-2.25529	3.06601e-48	-2.60632	7.55002e-30
CGTRNA_RS09820	cg2196	cg2196	2089189	2089548	360	-//- && -	-2.08583	1.53245e-42	-2.31784	1.28234e-17
CGTRNA_RS09840	cg2200	cg2200	2093266	2093898	633	sp|O32197|LIAR_BACSU Transcriptional regulatory protein LiaR OS=Bacillus subtilis (strain 168) GN=liaR PE=2 SV=1//1.26141e-37 && PF00196:Bacterial regulatory proteins, luxR family|PF00072:Response regulator receiver domain	2.09129	4.82839e-09	3.53039	1.19419e-22
CGTRNA_RS09845	cg2201	cg2201	2093895	2095028	1134	sp|O32198|LIAS_BACSU Sensor histidine kinase LiaS OS=Bacillus subtilis (strain 168) GN=liaS PE=2 SV=1//2.28227e-17 && PF07730:Histidine kinase	2.58386	0.000115471	3.00454	2.28877e-10
CGTRNA_RS09855	cg2204	cg2204	2096114	2096806	693	sp|Q87JM4|MACB_VIBPA Macrolide export ATP-binding/permease protein MacB OS=Vibrio parahaemolyticus serotype O3:K6 (strain RIMD 2210633) GN=macB PE=3 SV=1//2.98414e-42 && PF00005:ABC transporter	3.13785	0.036384	3.19294	0.00228532
CGTRNA_RS09860	cg2206	ispG	2097397	2098578	1182	sp|Q8NP12|ISPG_CORGL 4-hydroxy-3-methylbut-2-en-1-yl diphosphate synthase (flavodoxin) OS=Corynebacterium glutamicum (strain ATCC 13032 / DSM 20300 / JCM 1318 / LMG 3730 / NCIMB 10025) GN=ispG PE=3 SV=1//0 && PF04551:GcpE protein	-0.99604	2.11174e-09	-0.638395	0.00456388
CGTRNA_RS09875	cg2211	cg2211	2101372	2101815	444	sp|Q8NP09|Y2017_CORGL Uncharacterized membrane protein Cgl2017/cg2211 OS=Corynebacterium glutamicum (strain ATCC 13032 / DSM 20300 / JCM 1318 / LMG 3730 / NCIMB 10025) GN=Cgl2017 PE=4 SV=1//4.74797e-105 && PF10939:Protein of unknown function (DUF2631)	-1.84944	1.75307e-30	-1.91688	2.45989e-17
CGTRNA_RS09880	cg2212	cg2212	2101872	2103452	1581	-//- && -	0.733393	0.0134042	1.50525	4.98063e-07
CGTRNA_RS09890	cg2214	cg2214	2104501	2105601	1101	sp|Q8NP06|RLMN_CORGL Probable dual-specificity RNA methyltransferase RlmN OS=Corynebacterium glutamicum (strain ATCC 13032 / DSM 20300 / JCM 1318 / LMG 3730 / NCIMB 10025) GN=rlmN PE=3 SV=1//0 && PF04055:Radical SAM superfamily	-0.75569	0.00128921	0.932424	5.65737e-05
CGTRNA_RS09910	cg2218	pyrH	2107983	2108714	732	sp|P59004|PYRH_CORGL Uridylate kinase OS=Corynebacterium glutamicum (strain ATCC 13032 / DSM 20300 / JCM 1318 / LMG 3730 / NCIMB 10025) GN=pyrH PE=3 SV=1//1.91663e-158 && PF00696:Amino acid kinase family	0.719763	5.54596e-05	-1.31902	3.91628e-08
CGTRNA_RS09915	cg2221	tsf	2109050	2109877	828	sp|Q8NP02|EFTS_CORGL Elongation factor Ts OS=Corynebacterium glutamicum (strain ATCC 13032 / DSM 20300 / JCM 1318 / LMG 3730 / NCIMB 10025) GN=tsf PE=3 SV=1//3.62349e-159 && PF00889:Elongation factor TS	0.961574	1.66643e-08	1.13613	1.95401e-07
CGTRNA_RS10015	cg2244	pcaB2	2129334	2130620	1287	sp|O42889|YBN5_SCHPO Uncharacterized protein C8E4.05c OS=Schizosaccharomyces pombe (strain 972 / ATCC 24843) GN=SPBC8E4.05c PE=3 SV=1//1.36071e-71 && PF10397:Adenylosuccinate lyase C-terminus|PF00206:Lyase	1.19351	0.0464641	1.26509	0.019736
CGTRNA_RS10040	cg2251	rimM	2133795	2134310	516	sp|Q8NNX5|RIMM_CORGL Ribosome maturation factor RimM OS=Corynebacterium glutamicum (strain ATCC 13032 / DSM 20300 / JCM 1318 / LMG 3730 / NCIMB 10025) GN=rimM PE=3 SV=1//2.86368e-119 && PF01782:RimM N-terminal domain|PF05239:PRC-barrel domain	-1.04268	0.000261552	-0.661233	0.0266317
CGTRNA_RS10055	cg2254	cg2254	2135675	2136151	477	sp|Q566C8|ANR54_RAT Ankyrin repeat domain-containing protein 54 OS=Rattus norvegicus GN=Ankrd54 PE=2 SV=1//9.40991e-08 && PF12796:Ankyrin repeats (3 copies)	-0.825426	0.00919758	-1.0225	0.00182393
CGTRNA_RS10080	cg2260	glnK	2141798	2142136	339	sp|P9WN31|GLNB_MYCTU Nitrogen regulatory protein P-II OS=Mycobacterium tuberculosis (strain ATCC 25618 / H37Rv) GN=glnB PE=1 SV=1//5.24012e-54 && PF00543:Nitrogen regulatory protein P-II	1.62269	1.52476e-10	-1.34504	0.00117115
CGTRNA_RS10095	cg2263	cg2263	2146139	2149513	3375	-//- && -	-1.87248	2.6198e-20	0.976806	3.93587e-05
CGTRNA_RS10130	cg2271	cg2271	2157721	2158338	618	-//- && PF01545:Cation efflux family	0.961331	0.0480352	1.44649	0.00281893
CGTRNA_RS10175	cg2283	cg2283	2168035	2168433	399	-//- && -	-0.80298	0.000117004	-1.45394	1.0101e-06
CGTRNA_RS10180	cg2284	cg2284	2168464	2169792	1329	-//- && PF16268:Domain of unknown function (DUF4921)	-0.860546	0.000316002	-0.741931	0.0094008
CGTRNA_RS10200	cg2289	glgP2	2172020	2174572	2553	sp|P9WMW1|PHSG_MYCTU Glycogen phosphorylase OS=Mycobacterium tuberculosis (strain ATCC 25618 / H37Rv) GN=glgP PE=1 SV=1//0 && PF11897:Protein of unknown function (DUF3417)|PF00343:Carbohydrate phosphorylase	1.58476	0.000540737	1.52409	0.00120165
CGTRNA_RS10210	cg2291	pyk	2175696	2177123	1428	sp|Q46078|KPYK_CORGL Pyruvate kinase OS=Corynebacterium glutamicum (strain ATCC 13032 / DSM 20300 / JCM 1318 / LMG 3730 / NCIMB 10025) GN=pyk PE=1 SV=1//0 && PF00224:Pyruvate kinase, barrel domain|PF02887:Pyruvate kinase, alpha/beta domain	-1.24496	8.09851e-13	-0.845943	9.53644e-05
CGTRNA_RS10230	cg2296	hisI	2179948	2180304	357	sp|Q8NNT9|HIS3_CORGL Phosphoribosyl-AMP cyclohydrolase OS=Corynebacterium glutamicum (strain ATCC 13032 / DSM 20300 / JCM 1318 / LMG 3730 / NCIMB 10025) GN=hisI PE=3 SV=1//4.23594e-85 && PF01502:Phosphoribosyl-AMP cyclohydrolase	-1.17716	7.7255e-07	1.17779	1.6939e-06
CGTRNA_RS10235	cg2297	hisF	2180301	2181077	777	sp|O31139|HIS6_CORGL Imidazole glycerol phosphate synthase subunit HisF OS=Corynebacterium glutamicum (strain ATCC 13032 / DSM 20300 / JCM 1318 / LMG 3730 / NCIMB 10025) GN=hisF PE=3 SV=2//1.75434e-175 && PF00977:Histidine biosynthesis protein	-0.794434	0.000140576	0.936168	6.39237e-05
CGTRNA_RS10240	cg2298	impA	2181079	2181906	828	sp|O53907|IMPA_MYCTU Probable inositol 1-monophosphatase ImpA OS=Mycobacterium tuberculosis (strain ATCC 25618 / H37Rv) GN=impA PE=2 SV=1//3.0339e-46 && PF00459:Inositol monophosphatase family	-1.59473	1.28065e-14	0.929528	6.71884e-05
CGTRNA_RS10255	cg2301	cg2301	2184349	2185617	1269	-//- && PF07690:Major Facilitator Superfamily	-0.487823	0.0319471	1.05785	6.696e-06
CGTRNA_RS10305	cg2311	cg2311	2195180	2195983	804	sp|Q57060|Y095_HAEIN Uncharacterized protein HI_0095 OS=Haemophilus influenzae (strain ATCC 51907 / DSM 11121 / KW20 / Rd) GN=HI_0095 PE=4 SV=1//3.38101e-35 && PF13649:Methyltransferase domain	-0.619541	0.0452967	1.17695	4.21603e-05
CGTRNA_RS10315	cg2313	idhA3	2196797	2197810	1014	sp|P40332|IOLX_BACSU scyllo-inositol 2-dehydrogenase (NAD(+)) OS=Bacillus subtilis (strain 168) GN=iolX PE=1 SV=2//1.28781e-48 && PF01408:Oxidoreductase family, NAD-binding Rossmann fold	4.5681	0.0167901	4.42038	0.0227078
CGTRNA_RS10330	cg2317	cg2317	2199928	2200938	1011	sp|O34451|YVRB_BACSU Uncharacterized ABC transporter permease protein YvrB OS=Bacillus subtilis (strain 168) GN=yvrB PE=3 SV=1//5.23955e-42 && PF01032:FecCD transport family	-1.13523	0.00277383	0.982581	0.00301531
CGTRNA_RS10340	cg2320	cg2320	2202045	2202488	444	sp|P0ACN3|YTFH_SHIFL Uncharacterized HTH-type transcriptional regulator YtfH OS=Shigella flexneri GN=ytfH PE=3 SV=1//7.38835e-24 && PF01638:HxlR-like helix-turn-helix	0.943434	0.0205029	1.8791	1.29711e-08
CGTRNA_RS10350	cg2322	cg2322	2204190	2204798	609	-//- && -	0.840445	0.0243602	0.828887	0.0459108
CGTRNA_RS10370	cg2328	cg2328	2209537	2210586	1050	-//- && -	1.22802	5.88478e-05	1.05413	0.00410004
CGTRNA_RS10380	cg2330	cg2330	2211767	2212147	381	sp|Q44264|HSLR_AERSA Heat shock protein 15 homolog OS=Aeromonas salmonicida GN=hslR PE=3 SV=1//9.27612e-13 && PF01479:S4 domain	-0.865362	1.68309e-05	-1.84521	9.55628e-14
CGTRNA_RS10385	cg2331	cg2331	2212158	2212391	234	-//- && -	-1.09058	5.77898e-08	-2.53043	1.66545e-22
CGTRNA_RS10395	cg2333	treZ	2213130	2214854	1725	sp|P9WQ23|TREZ_MYCTU Malto-oligosyltrehalose trehalohydrolase OS=Mycobacterium tuberculosis (strain ATCC 25618 / H37Rv) GN=treZ PE=1 SV=1//0 && PF00128:Alpha amylase, catalytic domain|PF11941:Domain of unknown function (DUF3459)	0.882821	1.8262e-07	0.613116	0.00697059
CGTRNA_RS10440	cg2343	cg2343	2225768	2228422	2655	sp|P55709|Y4YA_RHISN Uncharacterized protein y4yA OS=Rhizobium sp. (strain NGR234) GN=NGR_a00720 PE=4 SV=1//1.87866e-33 && PF13454:FAD-NAD(P)-binding|PF02784:Pyridoxal-dependent decarboxylase, pyridoxal binding domain	0.827323	1.38533e-05	1.29563	6.94536e-08
CGTRNA_RS10445	cg2344	cg2344	2228392	2229345	954	sp|Q99X99|SBNA_STAAN Probable siderophore biosynthesis protein SbnA OS=Staphylococcus aureus (strain N315) GN=sbnA PE=3 SV=1//4.0291e-60 && PF00291:Pyridoxal-phosphate dependent enzyme	1.37777	2.0625e-06	1.18862	0.000643236
CGTRNA_RS10450	cg2345	cg2345	2229451	2230032	582	-//- && -	-1.04079	0.000672851	1.68156	3.10619e-10
CGTRNA_RS10455	cg2346	rluD	2230032	2230964	933	sp|P0A5T3|Y1567_MYCBO Uncharacterized RNA pseudouridine synthase Mb1567 OS=Mycobacterium bovis (strain ATCC BAA-935 / AF2122/97) GN=Mb1567 PE=3 SV=1//3.17434e-145 && PF00849:RNA pseudouridylate synthase	-0.558475	0.0182077	1.12773	4.21362e-06
CGTRNA_RS10465	cg2348	cg2348	2231865	2232725	861	-//- && -	-0.895413	0.00531491	-1.71484	5.31507e-06
CGTRNA_RS10470	cg2349	cg2349	2232883	2234535	1653	sp|P25256|TLRC_STRFR Tylosin resistance ATP-binding protein TlrC OS=Streptomyces fradiae GN=tlrC PE=3 SV=1//6.75211e-52 && PF00005:ABC transporter	2.29742	8.47601e-11	0.98293	0.000506781
CGTRNA_RS10495	cg2355	dinP	2238566	2239969	1404	sp|Q8NNP4|DPO4_CORGL DNA polymerase IV OS=Corynebacterium glutamicum (strain ATCC 13032 / DSM 20300 / JCM 1318 / LMG 3730 / NCIMB 10025) GN=dinB PE=3 SV=1//0 && PF11798:IMS family HHH motif|PF00817:impB/mucB/samB family|PF11799:impB/mucB/samB family C-terminal domain	-0.70911	0.0323921	0.988959	0.00115582
CGTRNA_RS10500	cg2356	cg2356	2240057	2240917	861	sp|P0AA67|RHTA_ECOLI Threonine/homoserine exporter RhtA OS=Escherichia coli (strain K12) GN=rhtA PE=1 SV=1//1.02547e-07 && PF00892:EamA-like transporter family	1.73995	0.000135103	1.25086	0.0212592
CGTRNA_RS10515	cg2359	ileS	2242657	2245821	3165	sp|Q8NNP0|SYI_CORGL Isoleucine--tRNA ligase OS=Corynebacterium glutamicum (strain ATCC 13032 / DSM 20300 / JCM 1318 / LMG 3730 / NCIMB 10025) GN=ileS PE=3 SV=1//0 && PF00133:tRNA synthetases class I (I, L, M and V)|PF08264:Anticodon-binding domain of tRNA	1.23453	4.25514e-07	1.22006	1.08001e-08
CGTRNA_RS10560	cg2368	murC	2252835	2254295	1461	sp|P94335|MURC_CORGL UDP-N-acetylmuramate--L-alanine ligase OS=Corynebacterium glutamicum (strain ATCC 13032 / DSM 20300 / JCM 1318 / LMG 3730 / NCIMB 10025) GN=murC PE=3 SV=5//0 && PF01225:Mur ligase family, catalytic domain|PF02875:Mur ligase family, glutamate ligase domain|PF08245:Mur ligase middle domain	-0.527249	0.0042323	1.34811	4.54721e-10
CGTRNA_RS10565	cg2369	murG	2254330	2255421	1092	sp|Q8NNN5|MURG_CORGL UDP-N-acetylglucosamine--N-acetylmuramyl-(pentapeptide) pyrophosphoryl-undecaprenol N-acetylglucosamine transferase OS=Corynebacterium glutamicum (strain ATCC 13032 / DSM 20300 / JCM 1318 / LMG 3730 / NCIMB 10025) GN=murG PE=3 SV=2//0 && PF04101:Glycosyltransferase family 28 C-terminal domain|PF03033:Glycosyltransferase family 28 N-terminal domain	0.39458	0.0418983	1.03434	4.25855e-06
CGTRNA_RS10580	cg2372	mraY	2258531	2259631	1101	sp|Q8NNN2|MRAY_CORGL Phospho-N-acetylmuramoyl-pentapeptide-transferase OS=Corynebacterium glutamicum (strain ATCC 13032 / DSM 20300 / JCM 1318 / LMG 3730 / NCIMB 10025) GN=mraY PE=3 SV=1//0 && PF00953:Glycosyl transferase family 4	-0.889906	9.5491e-05	1.46824	3.98794e-10
CGTRNA_RS10585	cg2373	murF	2259638	2261182	1545	sp|P9WJL1|MURF_MYCTU UDP-N-acetylmuramoyl-tripeptide--D-alanyl-D-alanine ligase OS=Mycobacterium tuberculosis (strain ATCC 25618 / H37Rv) GN=murF PE=1 SV=1//4.69967e-121 && PF08245:Mur ligase middle domain|PF01225:Mur ligase family, catalytic domain|PF02875:Mur ligase family, glutamate ligase domain	-1.19738	7.49032e-09	1.849	1.81277e-16
CGTRNA_RS10620	cg2381	cg2381	2268901	2269326	426	-//- && -	-1.01164	0.000227778	1.00697	0.00515662
CGTRNA_RS10630	cg2383	metF	2270121	2271101	981	sp|O54235|METF_STRLI 5,10-methylenetetrahydrofolate reductase OS=Streptomyces lividans GN=metF PE=3 SV=1//1.30997e-68 && PF02219:Methylenetetrahydrofolate reductase	-1.13315	1.74425e-06	-1.17372	0.00185058
CGTRNA_RS10645	cg2386	cg2386	2273921	2274292	372	sp|O53509|Y2175_MYCTU DNA-binding protein Rv2175c OS=Mycobacterium tuberculosis (strain ATCC 25618 / H37Rv) GN=Rv2175c PE=1 SV=3//4.25287e-25 && -	-0.6185	0.0301924	-1.18263	0.0001278
CGTRNA_RS10660	cg2390	cg2390	2277987	2279297	1311	sp|P9WMZ9|PIMG_MYCTU Polyprenol-phosphate-mannose-dependent alpha-(1-2)-phosphatidylinositol mannoside mannosyltransferase OS=Mycobacterium tuberculosis (strain ATCC 25618 / H37Rv) GN=Rv2181 PE=1 SV=1//3.57182e-35 && PF09594:Glycosyltransferase family 87	1.11809	0.000979595	0.855376	0.0312109
CGTRNA_RS10665	cg2391	aroG	2279366	2280754	1389	sp|A0R033|AROG_MYCS2 Phospho-2-dehydro-3-deoxyheptonate aldolase AroG OS=Mycobacterium smegmatis (strain ATCC 700084 / mc(2)155) GN=aroG PE=3 SV=1//0 && PF01474:Class-II DAHP synthetase family	-0.868137	2.95733e-05	0.65943	0.00416163
CGTRNA_RS10670	cg2392	cg2392	2280842	2281348	507	sp|P9WJ73|EXRBN_MYCTU 3&apos;-5&apos; exoribonuclease Rv2179c OS=Mycobacterium tuberculosis (strain ATCC 25618 / H37Rv) GN=Rv2179c PE=1 SV=1//6.09554e-65 && PF16473:3' exoribonuclease, RNase T-like	0.544739	0.0280865	-1.32315	8.86971e-05
CGTRNA_RS10705	cg2400	cg2400	2289302	2290447	1146	sp|Q8NNK8|PIMB_CORGL GDP-mannose-dependent alpha-(1-6)-phosphatidylinositol monomannoside mannosyltransferase OS=Corynebacterium glutamicum (strain ATCC 13032 / DSM 20300 / JCM 1318 / LMG 3730 / NCIMB 10025) GN=pimB PE=1 SV=1//0 && PF00534:Glycosyl transferases group 1|PF13439:Glycosyltransferase Family 4	1.03505	2.54481e-06	1.30625	1.41035e-07
CGTRNA_RS10715	cg2402	cg2402	2291637	2292266	630	sp|Q8NNK6|Y2188_CORGL Probable endopeptidase Cgl2188 OS=Corynebacterium glutamicum (strain ATCC 13032 / DSM 20300 / JCM 1318 / LMG 3730 / NCIMB 10025) GN=Cgl2188 PE=3 SV=1//1.07465e-109 && PF00877:NlpC/P60 family	-5.96756	7.44571e-181	-2.40214	2.03957e-28
CGTRNA_RS10720	cg2403	qcrB	2293141	2294760	1620	sp|Q79VE9|QCRB_CORGL Menaquinol-cytochrome c reductase cytochrome b subunit OS=Corynebacterium glutamicum (strain ATCC 13032 / DSM 20300 / JCM 1318 / LMG 3730 / NCIMB 10025) GN=qcrB PE=3 SV=1//0 && PF13631:Cytochrome b(N-terminal)/b6/petB	-1.959	1.29897e-27	1.78533	3.50765e-18
CGTRNA_RS10725	cg2404	qcrA1	2294757	2295983	1227	sp|Q79VE8|QCRA_CORGL Menaquinol-cytochrome c reductase iron-sulfur subunit OS=Corynebacterium glutamicum (strain ATCC 13032 / DSM 20300 / JCM 1318 / LMG 3730 / NCIMB 10025) GN=qcrA PE=3 SV=1//0 && PF00355:Rieske [2Fe-2S] domain	-1.86482	1.9196e-18	1.66356	4.54838e-16
CGTRNA_RS10730	cg2405	qcrC	2295980	2296870	891	sp|Q8NNK5|QCRC_CORGL Menaquinol-cytochrome c reductase cytochrome c subunit OS=Corynebacterium glutamicum (strain ATCC 13032 / DSM 20300 / JCM 1318 / LMG 3730 / NCIMB 10025) GN=qcrC PE=1 SV=2//0 && PF13442:Cytochrome C oxidase, cbb3-type, subunit III|PF00034:Cytochrome c	-1.63061	4.69042e-15	1.18648	1.85967e-08
CGTRNA_RS10745	cg2408	cg2408	2298141	2298572	432	sp|Q8NNK3|COX4_CORGL Cytochrome c oxidase polypeptide 4 OS=Corynebacterium glutamicum (strain ATCC 13032 / DSM 20300 / JCM 1318 / LMG 3730 / NCIMB 10025) GN=ctaF PE=1 SV=1//5.69608e-100 && PF12270:Cytochrome c oxidase subunit IV	-1.02222	1.31946e-05	0.971317	3.15828e-05
CGTRNA_RS10755	cg2410	ltsA	2300188	2302110	1923	sp|P9WN33|ASNH_MYCTU Putative asparagine synthetase [glutamine-hydrolyzing] OS=Mycobacterium tuberculosis (strain ATCC 25618 / H37Rv) GN=asnB PE=1 SV=1//0 && PF00733:Asparagine synthase|PF13537:Glutamine amidotransferase domain	0.670347	0.000318664	1.24445	1.27169e-06
CGTRNA_RS10765	cg2412	cg2412	2302923	2303642	720	sp|P64952|Y2229_MYCBO Uncharacterized protein Mb2229 OS=Mycobacterium bovis (strain ATCC BAA-935 / AF2122/97) GN=Mb2229 PE=4 SV=1//4.668e-33 && PF11241:Protein of unknown function (DUF3043)	-0.498775	0.0246917	-0.920234	0.00018394
CGTRNA_RS10785	cg2417	cg2417	2306697	2307458	762	sp|P9WGR5|Y484_MYCTU Uncharacterized oxidoreductase Rv0484c OS=Mycobacterium tuberculosis (strain ATCC 25618 / H37Rv) GN=Rv0484c PE=1 SV=1//2.93582e-58 && PF00106:short chain dehydrogenase	-0.516342	0.0154177	-1.05346	0.000119046
CGTRNA_RS10790	cg2418	ilvE	2307584	2308687	1104	sp|A0R066|ILVE_MYCS2 Branched-chain-amino-acid aminotransferase OS=Mycobacterium smegmatis (strain ATCC 700084 / mc(2)155) GN=ilvE PE=1 SV=1//8.14174e-163 && PF12427:Branched-chain amino acid aminotransferase|PF01063:Amino-transferase class IV	-1.13309	1.75648e-09	-1.95225	3.60601e-17
CGTRNA_RS10805	cg2421	sucB	2310941	2312968	2028	sp|Q8NNJ2|ODP2_CORGL Dihydrolipoyllysine-residue acetyltransferase component of pyruvate dehydrogenase complex OS=Corynebacterium glutamicum (strain ATCC 13032 / DSM 20300 / JCM 1318 / LMG 3730 / NCIMB 10025) GN=aceF PE=1 SV=1//0 && PF02817:e3 binding domain|PF00364:Biotin-requiring enzyme|PF00198:2-oxoacid dehydrogenases acyltransferase (catalytic domain)	-0.645231	4.81384e-05	-0.860957	9.18135e-05
CGTRNA_RS10825	cg2425	cg2425	2316103	2317722	1620	sp|Q8NNI8|Y2211_CORGL Uncharacterized transporter Cgl2211/cg2425 OS=Corynebacterium glutamicum (strain ATCC 13032 / DSM 20300 / JCM 1318 / LMG 3730 / NCIMB 10025) GN=Cgl2211 PE=3 SV=1//0 && PF02080:TrkA-C domain|PF06826:Predicted Permease Membrane Region	-4.11461	1.39214e-98	-0.899881	0.000689856
CGTRNA_RS10835	cg2428	cg2428	2319747	2320220	474	-//- && PF06271:RDD family	-1.69797	2.58288e-10	-1.96312	2.4365e-15
CGTRNA_RS10860	cg2434	cg2434	2323595	2324503	909	sp|P64770|Y978_MYCBO Uncharacterized protein Mb0978c OS=Mycobacterium bovis (strain ATCC BAA-935 / AF2122/97) GN=Mb0978c PE=4 SV=1//1.10723e-15 && PF00296:Luciferase-like monooxygenase	-1.10571	0.00141591	-0.783617	0.0432261
CGTRNA_RS10875	cg2438	cg2438	2326855	2327073	219	-//- && -	2.30536	6.8159e-09	-2.59956	2.05486e-06
CGTRNA_RS10880	cg2440	cg2440	2327293	2328519	1227	sp|Q0K843|SAUU_CUPNH Probable sulfoacetate transporter SauU OS=Cupriavidus necator (strain ATCC 17699 / H16 / DSM 428 / Stanier 337) GN=sauU PE=2 SV=1//4.91721e-14 && PF07690:Major Facilitator Superfamily	0.745819	0.00741499	1.23911	0.000211806
CGTRNA_RS10915	cg2449	cg2449	2336026	2337132	1107	-//- && PF10979:Protein of unknown function (DUF2786)	-2.3252	0.00195291	-1.66718	0.0324632
CGTRNA_RS10920	cg2450	cg2450	2337273	2339090	1818	sp|P9WLH8|Y2226_MYCTO Uncharacterized protein MT2285 OS=Mycobacterium tuberculosis (strain CDC 1551 / Oshkosh) GN=MT2285 PE=4 SV=1//1.06608e-12 && PF05235:CHAD domain|PF01928:CYTH domain	-1.31947	1.40663e-12	-0.642037	0.00781407
CGTRNA_RS10925	cg2451	cg2451	2339144	2339326	183	-//- && -	1.07649	1.1015e-06	-1.37849	6.26822e-06
CGTRNA_RS10945	cg2455	cg2455	2343082	2344230	1149	sp|P64956|Y2253_MYCBO Uncharacterized protein Mb2253c OS=Mycobacterium bovis (strain ATCC BAA-935 / AF2122/97) GN=Mb2253c PE=3 SV=1//1.21846e-111 && PF13456:Reverse transcriptase-like|PF00300:Histidine phosphatase superfamily (branch 1)	-1.11846	3.34113e-08	0.852575	0.00121781
CGTRNA_RS10960	cg2458	pgp2	2346217	2346873	657	sp|P68910|Y2257_MYCBO Uncharacterized protein Mb2257 OS=Mycobacterium bovis (strain ATCC BAA-935 / AF2122/97) GN=Mb2257 PE=3 SV=1//1.7835e-42 && PF13419:Haloacid dehalogenase-like hydrolase	-1.6895	4.72599e-15	-0.687463	0.0163605
CGTRNA_RS10970	cg2460	cg2460	2347395	2348396	1002	sp|P66884|Y2259_MYCBO Uncharacterized SURF1-like protein Mb2259 OS=Mycobacterium bovis (strain ATCC BAA-935 / AF2122/97) GN=Mb2259 PE=3 SV=1//5.67525e-62 && PF02104:SURF1 family	-1.69081	1.24846e-21	-0.566853	0.0292211
CGTRNA_RS11025	cg2470	cg2470	2356179	2357171	993	sp|Q9ZDG2|Y367_RICPR Uncharacterized protein RP367 OS=Rickettsia prowazekii (strain Madrid E) GN=RP367 PE=4 SV=1//2.69282e-13 && PF04392:ABC transporter substrate binding protein	0.769006	0.0156683	-1.24531	7.02337e-05
CGTRNA_RS11050	cg2474	nagD	2359670	2360497	828	sp|P0AF24|NAGD_ECOLI Ribonucleotide monophosphatase NagD OS=Escherichia coli (strain K12) GN=nagD PE=1 SV=1//1.39028e-68 && PF13242:HAD-hyrolase-like|PF13344:Haloacid dehalogenase-like hydrolase	-1.68901	6.04421e-23	-0.81805	0.000289542
CGTRNA_RS11140	cg2491	cg2491	2373513	2373758	246	-//- && -	-1.00183	0.00482565	-1.36763	0.000504863
CGTRNA_RS11170	cg2497	cg2497	2381451	2381939	489	-//- && -	-1.68432	3.05082e-13	-1.26387	4.3705e-07
CGTRNA_RS11175	cg2498	cg2498	2381952	2382515	564	-//- && -	-1.84189	3.90625e-19	-1.41851	8.48826e-10
CGTRNA_RS11180	cg2499	glyS	2382628	2384013	1386	sp|Q8NNC6|SYG_CORGL Glycine--tRNA ligase OS=Corynebacterium glutamicum (strain ATCC 13032 / DSM 20300 / JCM 1318 / LMG 3730 / NCIMB 10025) GN=glyQS PE=3 SV=1//0 && PF03129:Anticodon binding domain|PF00587:tRNA synthetase class II core domain (G, H, P, S and T)	-1.09639	8.29155e-09	-0.781177	0.000901706
CGTRNA_RS11185	cg2500	cg2500	2384255	2384626	372	sp|P9WMI5|SMTB_MYCTU HTH-type transcriptional repressor SmtB OS=Mycobacterium tuberculosis (strain ATCC 25618 / H37Rv) GN=smtB PE=1 SV=1//5.78664e-16 && PF01022:Bacterial regulatory protein, arsR family	-2.85264	7.06347e-55	-2.62401	6.95732e-30
CGTRNA_RS11190	cg2502	fur	2384667	2385101	435	sp|P9WN85|ZUR_MYCTU Zinc uptake regulation protein OS=Mycobacterium tuberculosis (strain ATCC 25618 / H37Rv) GN=zur PE=1 SV=1//1.38581e-46 && PF01475:Ferric uptake regulator family	-1.46534	9.64616e-15	-2.23923	1.51761e-22
CGTRNA_RS11220	cg2511	cg2511	2390662	2391984	1323	sp|P67131|Y2387_MYCBO UPF0053 protein Mb2387c OS=Mycobacterium bovis (strain ATCC BAA-935 / AF2122/97) GN=Mb2387c PE=3 SV=1//4.06117e-147 && PF00571:CBS domain|PF03471:Transporter associated domain|PF01595:Domain of unknown function DUF21	-1.31407	9.00404e-07	1.63647	4.52988e-09
CGTRNA_RS11225	cg2512	cg2512	2391985	2392575	591	sp|Q8NNB7|YBEY_CORGL Endoribonuclease YbeY OS=Corynebacterium glutamicum (strain ATCC 13032 / DSM 20300 / JCM 1318 / LMG 3730 / NCIMB 10025) GN=ybeY PE=3 SV=1//4.06981e-142 && PF02130:Uncharacterized protein family UPF0054	-1.5257	2.1733e-11	0.560458	0.0308296
CGTRNA_RS11230	cg2513	phoH2	2392572	2393591	1020	sp|P9WIA3|PHOL_MYCTU PhoH-like protein OS=Mycobacterium tuberculosis (strain ATCC 25618 / H37Rv) GN=Rv2368c PE=1 SV=1//4.87102e-142 && PF02562:PhoH-like protein	-0.677091	0.000828918	0.807105	0.000784632
CGTRNA_RS11235	cg2514	cg2514	2393647	2394372	726	sp|P9WGX1|RSME_MYCTU Ribosomal RNA small subunit methyltransferase E OS=Mycobacterium tuberculosis (strain ATCC 25618 / H37Rv) GN=rsmE PE=1 SV=1//4.07709e-35 && PF04452:RNA methyltransferase	-0.802336	0.000142101	1.28984	7.68386e-08
CGTRNA_RS11245	cg2516	hrcA	2395587	2396615	1029	sp|A4QFZ9|HRCA_CORGB Heat-inducible transcription repressor HrcA OS=Corynebacterium glutamicum (strain R) GN=hrcA PE=3 SV=1//0 && PF01628:HrcA protein C terminal domain	-0.607134	0.000786187	0.514396	0.0299936
CGTRNA_RS11255	cg2518	cg2518	2397877	2398377	501	-//- && -	-1.99247	3.07578e-14	-1.30839	7.10646e-07
CGTRNA_RS11300	cg2529	treS	2409731	2411584	1854	sp|A0R6E0|TRES_MYCS2 Trehalose synthase/amylase TreS OS=Mycobacterium smegmatis (strain ATCC 700084 / mc(2)155) GN=treS PE=1 SV=1//0 && PF16657:Maltogenic Amylase, C-terminal domain|PF00128:Alpha amylase, catalytic domain	1.56037	2.05553e-16	0.549	0.0225354
CGTRNA_RS11310	cg2531	idi	2412677	2413246	570	sp|Q8NN99|IDI_CORGL Isopentenyl-diphosphate Delta-isomerase OS=Corynebacterium glutamicum (strain ATCC 13032 / DSM 20300 / JCM 1318 / LMG 3730 / NCIMB 10025) GN=idi PE=3 SV=1//8.19758e-138 && PF00293:NUDIX domain	-1.40529	1.44318e-11	-1.84443	4.61469e-13
CGTRNA_RS11315	cg2533	cg2533	2413274	2415031	1758	-//- && -	3.20761	0.000146685	3.07813	0.000401619
CGTRNA_RS11325	cg2535	cg2535	2415705	2416226	522	-//- && -	0.716997	0.00230515	-1.30895	2.12803e-05
CGTRNA_RS11330	cg2536	aecD	2416281	2417387	1107	sp|Q93QC6|CBL_CORGT Cystathionine beta-lyase OS=Corynebacterium glutamicum GN=metC PE=1 SV=1//0 && PF00155:Aminotransferase class I and II	-1.03309	5.06817e-09	-0.572798	0.0143489
CGTRNA_RS11335	cg2537	brnQ	2417391	2418671	1281	sp|O06754|BRNQ_CORGL Branched-chain amino acid transport system carrier protein OS=Corynebacterium glutamicum (strain ATCC 13032 / DSM 20300 / JCM 1318 / LMG 3730 / NCIMB 10025) GN=brnQ PE=3 SV=2//0 && PF05525:Branched-chain amino acid transport protein	-1.02267	1.83897e-07	0.912915	6.82521e-05
CGTRNA_RS11365	cg2544	cg2544	2426391	2427113	723	sp|P0ACM4|YDFH_SHIFL Uncharacterized HTH-type transcriptional regulator YdfH OS=Shigella flexneri GN=ydfH PE=3 SV=1//6.48226e-13 && PF00392:Bacterial regulatory proteins, gntR family|PF07729:FCD domain	-1.91537	4.16718e-07	-1.10244	0.00499741
CGTRNA_RS11390	cg2550	cg2550	2431047	2432015	969	sp|P42062|APPB_BACSU Oligopeptide transport system permease protein AppB OS=Bacillus subtilis (strain 168) GN=appB PE=3 SV=2//9.20292e-53 && PF00528:Binding-protein-dependent transport system inner membrane component	-1.13222	0.0295034	1.34512	0.000149346
CGTRNA_RS11395	cg2551	cg2551	2432016	2432846	831	sp|Q7CQV4|GSID_SALTY Glutathione transport system permease protein GsiD OS=Salmonella typhimurium (strain LT2 / SGSC1412 / ATCC 700720) GN=gsiD PE=3 SV=1//1.40287e-49 && PF00528:Binding-protein-dependent transport system inner membrane component	-1.52857	0.00282762	1.48519	1.37225e-05
CGTRNA_RS11400	cg2552	cg2552	2432839	2434278	1440	sp|P33916|YEJF_ECOLI Uncharacterized ABC transporter ATP-binding protein YejF OS=Escherichia coli (strain K12) GN=yejF PE=3 SV=1//2.49671e-27 && PF00005:ABC transporter	-0.874356	0.040184	1.54747	9.29899e-07
CGTRNA_RS11405	cg2553	cg2553	2434275	2434826	552	sp|O66967|THPR_AQUAE RNA 2&apos;,3&apos;-cyclic phosphodiesterase OS=Aquifex aeolicus (strain VF5) GN=aq_768 PE=3 SV=1//3.04854e-10 && PF02834:LigT like Phosphoesterase	0.666772	0.00475504	-0.786104	0.0130624
CGTRNA_RS11410	cg2554	rbsK2	2434917	2435822	906	sp|O60116|RBSK_SCHPO Putative ribokinase OS=Schizosaccharomyces pombe (strain 972 / ATCC 24843) GN=SPBC16G5.02c PE=3 SV=1//9.07465e-23 && PF00294:pfkB family carbohydrate kinase	-1.56072	5.1871e-09	-1.71147	1.47011e-10
CGTRNA_RS11415	cg2556	cg2556	2436047	2437447	1401	-//- && PF03929:PepSY-associated TM region	-1.58331	4.16806e-06	-1.69254	2.70535e-05
CGTRNA_RS11425	cg2558	cg2558	2438834	2439601	768	sp|P39173|YEAD_ECOLI Putative glucose-6-phosphate 1-epimerase OS=Escherichia coli (strain K12) GN=yeaD PE=1 SV=2//2.18892e-23 && PF01263:Aldose 1-epimerase	-1.91005	9.03401e-32	-1.97308	2.60299e-20
CGTRNA_RS11440	cg2561	thiX	2443927	2444499	573	sp|P42461|THIX_CORGL Thiamine biosynthesis protein X OS=Corynebacterium glutamicum (strain ATCC 13032 / DSM 20300 / JCM 1318 / LMG 3730 / NCIMB 10025) GN=thiX PE=3 SV=2//6.19656e-110 && -	-1.32816	2.03134e-13	-2.11613	7.02936e-13
CGTRNA_RS11470	cg2567	cg2567	2451056	2451442	387	-//- && -	-0.890765	0.0185383	-2.21011	2.85184e-06
CGTRNA_RS11490	cg2571	lepA	2454222	2456069	1848	sp|Q8NN68|LEPA_CORGL Elongation factor 4 OS=Corynebacterium glutamicum (strain ATCC 13032 / DSM 20300 / JCM 1318 / LMG 3730 / NCIMB 10025) GN=lepA PE=3 SV=1//0 && PF00009:Elongation factor Tu GTP binding domain|PF00679:Elongation factor G C-terminus|PF06421:GTP-binding protein LepA C-terminus	0.500114	0.00385056	1.21665	1.79695e-08
CGTRNA_RS11495	cg2572	cg2572	2456338	2456949	612	-//- && PF02452:PemK-like, MazF-like toxin of type II toxin-antitoxin system	0.664395	0.00161306	1.17662	2.51229e-06
CGTRNA_RS11515	cg2576	cg2576	2458584	2459579	996	-//- && PF06144:DNA polymerase III, delta subunit	0.555995	0.0223477	0.708047	0.0254385
CGTRNA_RS11520	cg2577	cg2577	2459586	2461250	1665	-//- && PF03772:Competence protein	2.42004	9.14381e-06	1.41163	0.0414163
CGTRNA_RS11525	cg2578	cg2578	2461247	2461900	654	sp|P39694|COMEA_BACSU ComE operon protein 1 OS=Bacillus subtilis (strain 168) GN=comEA PE=1 SV=1//1.18427e-20 && PF10531:SLBB domain|PF12836:Helix-hairpin-helix motif	2.04017	2.46812e-05	1.47134	0.00353169
CGTRNA_RS11530	cg2579	cg2579	2461964	2462788	825	sp|Q8NN60|Y2349_CORGL DegV domain-containing protein Cgl2349/cg2579 OS=Corynebacterium glutamicum (strain ATCC 13032 / DSM 20300 / JCM 1318 / LMG 3730 / NCIMB 10025) GN=Cgl2349 PE=1 SV=1//6.95037e-163 && PF02645:Uncharacterised protein, DegV family COG1307	0.579021	0.00411116	0.546495	0.0332423
CGTRNA_RS11540	cg2582	cg2582	2463547	2464020	474	sp|Q9KD89|IOJAP_BACHD Ribosomal silencing factor RsfS OS=Bacillus halodurans (strain ATCC BAA-125 / DSM 18197 / FERM 7344 / JCM 9153 / C-125) GN=rsfS PE=1 SV=1//1.4066e-17 && PF02410:Ribosomal silencing factor during starvation	-0.627595	0.00566631	-1.34401	6.65044e-08
CGTRNA_RS11555	cg2586	proA	2466013	2467311	1299	sp|P0C1E0|PROA_CORGL Gamma-glutamyl phosphate reductase OS=Corynebacterium glutamicum (strain ATCC 13032 / DSM 20300 / JCM 1318 / LMG 3730 / NCIMB 10025) GN=proA PE=3 SV=1//0 && PF00171:Aldehyde dehydrogenase family	1.54331	2.80369e-19	0.629795	0.00502215
CGTRNA_RS11560	cg2587	cg2587	2467370	2468284	915	sp|P0C1E8|Y2355_CORGL Uncharacterized protein Cgl2355/cg2587 OS=Corynebacterium glutamicum (strain ATCC 13032 / DSM 20300 / JCM 1318 / LMG 3730 / NCIMB 10025) GN=Cgl2355 PE=3 SV=1//0 && PF02826:D-isomer specific 2-hydroxyacid dehydrogenase, NAD binding domain	0.8468	6.65244e-05	1.46905	1.46149e-10
CGTRNA_RS11590	cg2593	cg2593	2475212	2475484	273	-//- && -	-0.710445	0.0242268	-1.93913	6.46281e-07
CGTRNA_RS11600	cg2595	rplU	2475973	2476278	306	sp|Q8NN50|RL21_CORGL 50S ribosomal protein L21 OS=Corynebacterium glutamicum (strain ATCC 13032 / DSM 20300 / JCM 1318 / LMG 3730 / NCIMB 10025) GN=rplU PE=3 SV=1//1.96031e-66 && PF00829:Ribosomal prokaryotic L21 protein	-0.423217	0.0356077	-0.569524	0.0147506
CGTRNA_RS11605	cg2597	rne	2476504	2479569	3066	sp|A0R152|RNE_MYCS2 Ribonuclease E OS=Mycobacterium smegmatis (strain ATCC 700084 / mc(2)155) GN=rne PE=3 SV=1//0 && PF04760:Translation initiation factor IF-2, N-terminal region|PF10150:Ribonuclease E/G family	1.45021	2.20919e-14	0.864113	0.000213727
CGTRNA_RS11660	cg2608	folC	2485787	2487310	1524	sp|Q05865|FOLC_BACSU Folylpolyglutamate synthase OS=Bacillus subtilis (strain 168) GN=folC PE=3 SV=2//6.02661e-26 && PF08245:Mur ligase middle domain|PF02875:Mur ligase family, glutamate ligase domain	-0.647761	0.00435338	1.83933	2.41862e-15
CGTRNA_RS11675	cg2611	hscA	2491885	2493339	1455	sp|A8GHX9|HSCA_SERP5 Chaperone protein HscA OS=Serratia proteamaculans (strain 568) GN=hscA PE=3 SV=1//5.37522e-32 && PF00012:Hsp70 protein	-0.949628	6.16048e-07	-0.623	0.00856573
CGTRNA_RS11680	cg2612	cg2612	2493340	2493927	588	sp|P48636|LOGH_PSEAE Putative cytokinin riboside 5&apos;-monophosphate phosphoribohydrolase OS=Pseudomonas aeruginosa (strain ATCC 15692 / PAO1 / 1C / PRS 101 / LMG 12228) GN=PA4923 PE=3 SV=2//1.52257e-65 && PF03641:Possible lysine decarboxylase	-2.04219	1.94635e-30	-1.67627	1.41688e-12
CGTRNA_RS11685	cg2613	mdh	2493938	2494924	987	sp|Q8NN33|MDH_CORGL Malate dehydrogenase OS=Corynebacterium glutamicum (strain ATCC 13032 / DSM 20300 / JCM 1318 / LMG 3730 / NCIMB 10025) GN=mdh PE=3 SV=1//0 && PF02866:lactate/malate dehydrogenase, alpha/beta C-terminal domain|PF00056:lactate/malate dehydrogenase, NAD binding domain	-2.47726	8.41466e-48	-1.94738	2.45484e-19
CGTRNA_RS11715	cg2619	cg2619	2500224	2501156	933	-//- && PF03547:Membrane transport protein	1.09768	0.00659896	0.919426	0.000597342
CGTRNA_RS11745	cg2625	pcaF	2505877	2507103	1227	sp|Q0KBP1|BKTB_CUPNH Beta-ketothiolase BktB OS=Cupriavidus necator (strain ATCC 17699 / H16 / DSM 428 / Stanier 337) GN=bktB PE=1 SV=1//3.48791e-97 && PF02803:Thiolase, C-terminal domain|PF00108:Thiolase, N-terminal domain	4.81854	0.00186824	0.957009	0.0332536
CGTRNA_RS11760	cg2628	pcaI	2509921	2510289	369	sp|P20370|DC4C_ACIAD 4-carboxymuconolactone decarboxylase OS=Acinetobacter baylyi (strain ATCC 33305 / BD413 / ADP1) GN=pcaC PE=4 SV=2//1.41133e-35 && PF02627:Carboxymuconolactone decarboxylase family	3.24388	3.35713e-11	0.915556	0.029624
CGTRNA_RS11765	cg2629	pcaB1	2510289	2511407	1119	sp|P32427|PCAB_PSEPU 3-carboxy-cis,cis-muconate cycloisomerase (Fragment) OS=Pseudomonas putida GN=pcaB PE=1 SV=3//2.22346e-45 && PF00206:Lyase	3.92396	1.15359e-07	0.83879	0.0157588
CGTRNA_RS11770	cg2630	pcaG	2511382	2511996	615	sp|P20371|PCXA_ACIAD Protocatechuate 3,4-dioxygenase alpha chain OS=Acinetobacter baylyi (strain ATCC 33305 / BD413 / ADP1) GN=pcaG PE=1 SV=3//7.593e-26 && PF00775:Dioxygenase	6.48684	8.39171e-10	1.25734	0.0154351
CGTRNA_RS11775	cg2631	pcaH	2512008	2512700	693	sp|P15110|PCXB_BURCE Protocatechuate 3,4-dioxygenase beta chain OS=Burkholderia cepacia GN=pcaH PE=3 SV=1//2.48659e-85 && PF12391:Protocatechuate 3,4-dioxygenase beta subunit N terminal|PF00775:Dioxygenase	6.67763	3.95962e-10	1.02319	0.0260594
CGTRNA_RS11780	cg2633	cg2633	2512860	2514026	1167	sp|P72042|Y3776_MYCTU Uncharacterized protein Rv3776 OS=Mycobacterium tuberculosis (strain ATCC 25618 / H37Rv) GN=Rv3776 PE=4 SV=1//8.29878e-10 && -	3.72263	3.16844e-11	2.521	0.000137046
CGTRNA_RS11795	cg2636	catA1	2515695	2516552	858	sp|P95607|CATA_RHOOP Catechol 1,2-dioxygenase (Fragment) OS=Rhodococcus opacus GN=catA PE=1 SV=1//3.37031e-132 && PF00775:Dioxygenase|PF04444:Catechol dioxygenase N terminus	2.59178	2.92731e-06	-1.58377	0.0194171
CGTRNA_RS11845	cg2647	tig	2528433	2529782	1350	sp|Q8NMZ9|TIG_CORGL Trigger factor OS=Corynebacterium glutamicum (strain ATCC 13032 / DSM 20300 / JCM 1318 / LMG 3730 / NCIMB 10025) GN=tig PE=3 SV=1//0 && PF05698:Bacterial trigger factor protein (TF) C-terminus|PF05697:Bacterial trigger factor protein (TF)	0.960535	4.41553e-08	0.787785	0.00316432
CGTRNA_RS11875	cg2651	cg2651	2532791	2533042	252	-//- && -	2.32457	2.67423e-19	-0.703569	0.039634
CGTRNA_RS11900	cg2658	rpi	2535605	2536078	474	sp|P9WKD7|RPIB_MYCTU Ribose-5-phosphate isomerase B OS=Mycobacterium tuberculosis (strain ATCC 25618 / H37Rv) GN=rpiB PE=1 SV=1//1.25658e-86 && PF02502:Ribose/Galactose Isomerase	-1.03523	5.18972e-08	-2.79805	1.71431e-28
CGTRNA_RS11920	cg2664	cg2664	2540887	2541972	1086	-//- && PF13588:Type I restriction enzyme R protein N terminus (HSDR_N)	0.98075	0.0383892	1.50862	0.000646032
CGTRNA_RS11955	cg2673	cg2673	2546453	2547574	1122	-//- && PF07690:Major Facilitator Superfamily	1.56696	8.46984e-07	1.44923	4.44588e-05
CGTRNA_RS11960	cg2674	cg2674	2547654	2548889	1236	-//- && PF02627:Carboxymuconolactone decarboxylase family	1.87193	2.58202e-27	2.28597	1.28975e-25
CGTRNA_RS11980	cg2678	cg2678	2552384	2554093	1710	sp|P42061|APPA_BACSU Oligopeptide-binding protein AppA OS=Bacillus subtilis (strain 168) GN=appA PE=1 SV=2//2.25347e-15 && PF00496:Bacterial extracellular solute-binding proteins, family 5 Middle	1.05066	3.37137e-05	1.65351	8.49975e-10
CGTRNA_RS11985	cg2679	cg2679	2554240	2556183	1944	-//- && PF13454:FAD-NAD(P)-binding	2.18467	1.32805e-25	1.11166	1.17831e-05
CGTRNA_RS11990	cg2680	cg2680	2556235	2557605	1371	sp|Q84P54|GATP1_SOLLC Gamma aminobutyrate transaminase 1, mitochondrial OS=Solanum lycopersicum GN=GABA-TP1 PE=1 SV=1//7.64588e-56 && PF00202:Aminotransferase class-III	0.818363	0.000301713	1.24076	2.46018e-06
CGTRNA_RS12000	cg2684	cg2684	2559652	2560401	750	sp|P9WP09|Y364_MYCTU Uncharacterized membrane protein Rv0364 OS=Mycobacterium tuberculosis (strain ATCC 25618 / H37Rv) GN=Rv0364 PE=1 SV=1//5.11671e-46 && PF09335:SNARE associated Golgi protein	-0.601958	0.00913967	-1.27341	4.30211e-06
CGTRNA_RS12010	cg2686	cg2686	2561241	2561981	741	-//- && PF00440:Bacterial regulatory proteins, tetR family	-2.06426	3.3169e-32	-2.56775	1.1008e-28
CGTRNA_RS12015	cg2687	metB	2561985	2563145	1161	sp|P9WGB7|METB_MYCTU Cystathionine gamma-synthase OS=Mycobacterium tuberculosis (strain ATCC 25618 / H37Rv) GN=metB PE=1 SV=1//5.11128e-178 && PF01053:Cys/Met metabolism PLP-dependent enzyme	1.83145	5.0488e-16	1.66898	5.00231e-10
CGTRNA_RS12025	cg2689	glbO	2564078	2564473	396	sp|Q9CC59|TRHBO_MYCLE Group 2 truncated hemoglobin GlbO OS=Mycobacterium leprae (strain TN) GN=glbO PE=3 SV=1//9.41439e-42 && PF01152:Bacterial-like globin	-1.31917	4.53383e-07	-1.83649	2.5573e-08
CGTRNA_RS12040	cg2692	cg2692	2566270	2566737	468	-//- && PF13279:Thioesterase-like superfamily	0.825769	4.45587e-05	-1.01627	0.000263387
CGTRNA_RS12045	cg2693	cg2693	2566861	2567454	594	-//- && PF01663:Type I phosphodiesterase / nucleotide pyrophosphatase	2.30701	0.000503934	2.25576	0.000371628
CGTRNA_RS12060	cg2697	cg2697	2569542	2570159	618	-//- && PF00436:Single-strand binding protein family	1.27146	0.00452442	1.37855	0.00413293
CGTRNA_RS12095	cg2703	cg2703	2576281	2577195	915	sp|P37729|AMYC_THETU Probable starch degradation products transport system permease protein AmyC OS=Thermoanaerobacterium thermosulfurigenes GN=amyC PE=3 SV=1//9.99838e-60 && PF00528:Binding-protein-dependent transport system inner membrane component	-0.997249	5.85203e-07	-1.42182	9.54238e-07
CGTRNA_RS12100	cg2704	cg2704	2577199	2578044	846	sp|P37730|AMYD_THETU Probable starch degradation products transport system permease protein AmyD OS=Thermoanaerobacterium thermosulfurigenes GN=amyD PE=3 SV=1//4.19215e-66 && PF00528:Binding-protein-dependent transport system inner membrane component	-0.578832	0.00655697	-1.73118	8.96288e-10
CGTRNA_RS12115	cg2708	msiK1	2581184	2582314	1131	sp|Q7NRX5|UGPC_CHRVO sn-glycerol-3-phosphate import ATP-binding protein UgpC OS=Chromobacterium violaceum (strain ATCC 12472 / DSM 30191 / JCM 1249 / NBRC 12614 / NCIMB 9131 / NCTC 9757) GN=ugpC PE=3 SV=1//4.56811e-117 && PF00005:ABC transporter	0.405979	0.0483414	-0.53896	0.0143955
CGTRNA_RS12150	cg2715	cg2715	2587610	2588794	1185	sp|Q8NMU4|Y2470_CORGL UPF0272 protein Cgl2470/cg2715 OS=Corynebacterium glutamicum (strain ATCC 13032 / DSM 20300 / JCM 1318 / LMG 3730 / NCIMB 10025) GN=Cgl2470 PE=3 SV=1//0 && PF01969:Protein of unknown function DUF111	-1.9998	2.38112e-18	-1.64047	3.10338e-09
CGTRNA_RS12170	cg2719	cg2719	2591212	2592456	1245	sp|O51900|FES_DICD3 Enterochelin esterase OS=Dickeya dadantii (strain 3937) GN=fes PE=3 SV=2//5.69911e-13 && PF00756:Putative esterase|PF11806:Domain of unknown function (DUF3327)	0.940341	0.0056827	1.32626	4.90739e-05
CGTRNA_RS12235	cg2732	gntV	2602310	2602813	504	sp|P46859|GNTK_ECOLI Thermoresistant gluconokinase OS=Escherichia coli (strain K12) GN=gntK PE=1 SV=4//4.15211e-32 && PF01202:Shikimate kinase	-3.75997	3.4964e-15	4.64963	3.55231e-67
CGTRNA_RS12255	cg2736	bcp	2605265	2605741	477	sp|P9WIE1|BCP_MYCTU Putative peroxiredoxin Rv2521 OS=Mycobacterium tuberculosis (strain ATCC 25618 / H37Rv) GN=bcp PE=1 SV=1//2.3982e-64 && PF00578:AhpC/TSA family	-1.1267	2.46561e-09	-1.16948	6.94372e-07
CGTRNA_RS12260	cg2737	cg2737	2605763	2606428	666	-//- && PF00440:Bacterial regulatory proteins, tetR family	-1.28138	1.66243e-09	-0.78498	0.000659728
CGTRNA_RS12270	cg2739	cg2739	2606836	2608263	1428	sp|Q92EE1|LMRB_LISIN Lincomycin resistance protein LmrB OS=Listeria innocua serovar 6a (strain CLIP 11262) GN=lmrB PE=3 SV=1//1.83645e-80 && PF07690:Major Facilitator Superfamily	0.896511	0.0159536	0.864629	0.0241709
CGTRNA_RS12285	cg2743	fas-IA	2610320	2619310	8991	sp|Q00681|STCJ_EMENI Sterigmatocystin biosynthesis fatty acid synthase subunit alpha OS=Emericella nidulans (strain FGSC A4 / ATCC 38163 / CBS 112.46 / NRRL 194 / M139) GN=stcJ PE=3 SV=2//5.08954e-117 && PF02801:Beta-ketoacyl synthase, C-terminal domain|PF08354:Domain of unknown function (DUF1729)|PF00109:Beta-ketoacyl synthase, N-terminal domain|PF00698:Acyl transferase domain|PF01575:MaoC like …	-2.21254	1.66213e-39	0.815409	0.0130624
CGTRNA_RS12310	cg2748	cg2748	2622115	2622579	465	sp|P9WK51|LPRD_MYCTU Putative lipoprotein LprD OS=Mycobacterium tuberculosis (strain ATCC 25618 / H37Rv) GN=lprD PE=3 SV=1//2.01287e-14 && -	-2.16811	2.68157e-21	-1.75596	8.77317e-13
CGTRNA_RS12315	cg2750	cg2750	2622660	2623016	357	sp|P0A5E8|Y1377_MYCBO Uncharacterized protein Mb1377c OS=Mycobacterium bovis (strain ATCC BAA-935 / AF2122/97) GN=Mb1377c PE=4 SV=1//2.63887e-21 && PF12823:Domain of unknown function (DUF3817)	-2.89039	7.2558e-31	-1.99017	6.33563e-13
CGTRNA_RS12325	cg2753	rph	2623738	2624475	738	sp|Q8NMR4|RNPH_CORGL Ribonuclease PH OS=Corynebacterium glutamicum (strain ATCC 13032 / DSM 20300 / JCM 1318 / LMG 3730 / NCIMB 10025) GN=rph PE=3 SV=1//0 && PF03725:3' exoribonuclease family, domain 2|PF01138:3' exoribonuclease family, domain 1	0.49751	0.0206588	-0.595837	0.0380377
CGTRNA_RS12360	cg2761	cg2761	2629407	2630174	768	sp|P50474|Y1173_MYCLE Uncharacterized protein ML1173 OS=Mycobacterium leprae (strain TN) GN=ML1173 PE=3 SV=1//1.1783e-72 && PF12706:Beta-lactamase superfamily domain	-1.58501	6.3232e-16	-0.550824	0.0274231
CGTRNA_RS12400	cg2773	cg2773	2635186	2635737	552	-//- && PF00188:Cysteine-rich secretory protein family	1.57115	3.1581e-11	-0.7675	0.0300709
CGTRNA_RS12405	cg2774	cg2774	2635734	2637074	1341	sp|P9WJI8|PNCB1_MYCTO Nicotinate phosphoribosyltransferase pncB1 OS=Mycobacterium tuberculosis (strain CDC 1551 / Oshkosh) GN=pncB1 PE=3 SV=1//9.42374e-139 && PF04095:Nicotinate phosphoribosyltransferase (NAPRTase) family	0.609478	0.000503934	-0.73815	0.0016875
CGTRNA_RS12420	cg2778	cg2778	2640510	2641058	549	sp|A3DMF7|PTH_STAMF Peptidyl-tRNA hydrolase OS=Staphylothermus marinus (strain ATCC 43588 / DSM 3639 / F1) GN=pth PE=3 SV=1//7.0933e-06 && PF01981:Peptidyl-tRNA hydrolase PTH2	-2.04231	1.92622e-11	1.16252	3.20708e-06
CGTRNA_RS12440	cg2782	ftn	2646478	2646966	489	sp|P0CJ83|FTN_BACFR Bacterial non-heme ferritin OS=Bacteroides fragilis (strain YCH46) GN=ftnA PE=1 SV=1//8.2671e-30 && PF00210:Ferritin-like domain	-0.395851	0.0218767	-2.0013	5.29738e-22
CGTRNA_RS12465	cg2787	nrdI	2651355	2651801	447	sp|Q9XD64|NRDI_CORGL Protein NrdI OS=Corynebacterium glutamicum (strain ATCC 13032 / DSM 20300 / JCM 1318 / LMG 3730 / NCIMB 10025) GN=nrdI PE=3 SV=1//1.01758e-106 && PF07972:NrdI Flavodoxin like	0.992342	9.46015e-06	-1.78368	3.87939e-11
CGTRNA_RS12470	cg2789	nrdH	2652090	2652323	234	sp|Q56108|NRDH_SALTY Glutaredoxin-like protein NrdH OS=Salmonella typhimurium (strain LT2 / SGSC1412 / ATCC 700720) GN=nrdH PE=3 SV=1//7.93976e-19 && PF00462:Glutaredoxin	0.582576	0.00172023	-2.42174	7.49424e-23
CGTRNA_RS12480	cg2792	nadE	2653220	2654053	834	sp|Q8NMN7|NADE_CORGL NH(3)-dependent NAD(+) synthetase OS=Corynebacterium glutamicum (strain ATCC 13032 / DSM 20300 / JCM 1318 / LMG 3730 / NCIMB 10025) GN=nadE PE=3 SV=1//1.73345e-178 && PF02540:NAD synthase	0.663908	0.000400896	-0.802041	0.00155354
CGTRNA_RS12490	cg2794	cg2794	2654802	2655215	414	sp|P9WL05|Y3129_MYCTU Uncharacterized protein Rv3129 OS=Mycobacterium tuberculosis (strain ATCC 25618 / H37Rv) GN=Rv3129 PE=2 SV=1//1.76558e-19 && PF12900:Pyridoxamine 5'-phosphate oxidase	-2.00469	1.9661e-34	-0.923468	4.55704e-05
CGTRNA_RS12505	cg2797	cg2797	2657989	2658825	837	sp|O27710|PSLS_METTH Phosphosulfolactate synthase OS=Methanothermobacter thermautotrophicus (strain ATCC 29096 / DSM 1053 / JCM 10044 / NBRC 100330 / Delta H) GN=comA PE=3 SV=1//1.94784e-12 && PF02679:(2R)-phospho-3-sulfolactate synthase (ComA)	1.70546	0.000650392	1.51919	0.00541026
CGTRNA_RS12515	cg2799	pknE	2659120	2659845	726	-//- && PF13462:Thioredoxin	-1.14811	1.67014e-11	-1.54605	4.29468e-12
CGTRNA_RS12520	cg2800	pgm	2660060	2661724	1665	sp|P36938|PGM_ECOLI Phosphoglucomutase OS=Escherichia coli (strain K12) GN=pgm PE=1 SV=1//0 && PF02880:Phosphoglucomutase/phosphomannomutase, alpha/beta/alpha domain III|PF00408:Phosphoglucomutase/phosphomannomutase, C-terminal domain|PF02878:Phosphoglucomutase/phosphomannomutase, alpha/beta/alpha domain I|PF02879:Phosphoglucomutase/phosphomannomutase, alpha/beta/alpha domain II	-1.53843	9.87257e-16	-1.45353	8.76065e-07
CGTRNA_RS12535	cg2803	cg2803	2662447	2663241	795	sp|Q8NMM7|Y2544_CORGL UPF0317 protein Cgl2544/cg2803 OS=Corynebacterium glutamicum (strain ATCC 13032 / DSM 20300 / JCM 1318 / LMG 3730 / NCIMB 10025) GN=Cgl2544 PE=3 SV=1//0 && PF07286:Protein of unknown function (DUF1445)	-0.547689	0.0257557	-1.47047	7.42724e-07
CGTRNA_RS12540	cg2804	tnp21a(ISCg21a)	2663363	2664730	1368	-//- && PF13701:Transposase DDE domain group 1	-0.675627	0.0113848	-1.36072	1.65921e-05
CGTRNA_RS12565	cg2809	cg2809	2669054	2669770	717	-//- && PF07853:Protein of unknown function (DUF1648)	2.50122	3.489e-13	1.79636	3.27135e-06
CGTRNA_RS12570	cg2810	cg2810	2669865	2671253	1389	sp|P77529|YDJN_ECOLI Uncharacterized symporter YdjN OS=Escherichia coli (strain K12) GN=ydjN PE=3 SV=1//2.45226e-37 && PF00375:Sodium:dicarboxylate symporter family	0.967786	0.000118554	1.3415	3.22277e-05
CGTRNA_RS12640	cg2829	murA2	2690104	2691360	1257	sp|Q8NML5|MURA_CORGL UDP-N-acetylglucosamine 1-carboxyvinyltransferase OS=Corynebacterium glutamicum (strain ATCC 13032 / DSM 20300 / JCM 1318 / LMG 3730 / NCIMB 10025) GN=murA PE=3 SV=1//0 && PF00275:EPSP synthase (3-phosphoshikimate 1-carboxyvinyltransferase)	0.434242	0.0216962	0.823034	0.00055309
CGTRNA_RS12645	cg2830	pduO	2691421	2691993	573	sp|P53523|PDUO_MYCLE Cob(I)yrinic acid a,c-diamide adenosyltransferase OS=Mycobacterium leprae (strain TN) GN=ML1149 PE=3 SV=1//1.14969e-84 && PF01923:Cobalamin adenosyltransferase	-0.62308	0.000330413	-2.14544	3.28028e-21
CGTRNA_RS12655	cg2833	cysK	2693596	2694531	936	sp|P9WP55|CYSK_MYCTU O-acetylserine sulfhydrylase OS=Mycobacterium tuberculosis (strain ATCC 25618 / H37Rv) GN=cysK1 PE=1 SV=1//2.25466e-120 && PF00291:Pyridoxal-phosphate dependent enzyme	2.82377	3.11839e-29	0.924961	2.15414e-05
CGTRNA_RS12660	cg2834	cysE	2694717	2695283	567	sp|A8F961|CYSE_BACP2 Serine acetyltransferase OS=Bacillus pumilus (strain SAFR-032) GN=cysE PE=3 SV=1//1.7782e-63 && PF00132:Bacterial transferase hexapeptide (six repeats)	-0.946287	2.13297e-05	-0.974766	0.000255213
CGTRNA_RS12665	cg2835	cg2835	2695438	2695728	291	sp|A6QL79|NATD1_BOVIN Protein NATD1 OS=Bos taurus GN=NATD1 PE=3 SV=1//1.5445e-06 && PF14542:GCN5-related N-acetyl-transferase	-0.914184	5.45406e-07	-1.37661	1.30533e-08
CGTRNA_RS12715	cg2840	actA	2701046	2702554	1509	sp|B3EY95|SCACT_ACEAC Succinyl-CoA:acetate CoA-transferase OS=Acetobacter aceti PE=1 SV=1//0 && PF02550:Acetyl-CoA hydrolase/transferase N-terminal domain|PF13336:Acetyl-CoA hydrolase/transferase C-terminal domain	0.822203	4.63057e-05	-2.18849	2.82906e-15
CGTRNA_RS12720	cg2841	cg2841	2703047	2704192	1146	sp|P9WNS7|DUS_MYCTU Probable tRNA-dihydrouridine synthase OS=Mycobacterium tuberculosis (strain ATCC 25618 / H37Rv) GN=dus PE=1 SV=1//0 && PF01207:Dihydrouridine synthase (Dus)	-2.45252	4.74094e-38	-0.581958	0.015106
CGTRNA_RS12730	cg2843	pstB	2705123	2705896	774	sp|Q8NMK1|PSTB_CORGL Phosphate import ATP-binding protein PstB OS=Corynebacterium glutamicum (strain ATCC 13032 / DSM 20300 / JCM 1318 / LMG 3730 / NCIMB 10025) GN=pstB PE=3 SV=2//1.64993e-167 && PF00005:ABC transporter	-0.961393	0.000576593	0.870378	0.00148978
CGTRNA_RS12735	cg2844	pstA	2705932	2706855	924	sp|Q50097|PSTA_MYCLE Phosphate transport system permease protein PstA OS=Mycobacterium leprae (strain TN) GN=pstA PE=3 SV=1//1.95486e-83 && PF00528:Binding-protein-dependent transport system inner membrane component	-0.725794	0.028679	0.833237	0.0118039
CGTRNA_RS12765	cg2850	cg2850	2712341	2713030	690	sp|Q8NMJ4|Y2579_CORGL UPF0678 fatty acid-binding protein-like protein Cgl2579/cg2850 OS=Corynebacterium glutamicum (strain ATCC 13032 / DSM 20300 / JCM 1318 / LMG 3730 / NCIMB 10025) GN=Cgl2579 PE=3 SV=1//1.86502e-155 && PF08768:Domain of unknown function (DUF1794)	-0.490422	0.0105308	-1.06544	6.36834e-06
CGTRNA_RS12775	cg2852	cg2852	2714328	2715458	1131	sp|A7MTS4|YGFZ_VIBCB tRNA-modifying protein YgfZ OS=Vibrio campbellii (strain ATCC BAA-1116 / BB120) GN=VIBHAR_03546 PE=3 SV=1//3.26408e-07 && PF01571:Aminomethyltransferase folate-binding domain	-0.771735	0.000844316	-1.46187	4.95982e-09
CGTRNA_RS12795	cg2857	purF	2719388	2720872	1485	sp|P9WHQ7|PUR1_MYCTU Amidophosphoribosyltransferase OS=Mycobacterium tuberculosis (strain ATCC 25618 / H37Rv) GN=purF PE=1 SV=1//0 && PF00156:Phosphoribosyl transferase domain|PF13537:Glutamine amidotransferase domain	-2.82698	4.26442e-46	-0.69739	0.0044538
CGTRNA_RS12815	cg2862	purL	2723332	2725620	2289	sp|Q8NMI5|PURL_CORGL Phosphoribosylformylglycinamidine synthase subunit PurL OS=Corynebacterium glutamicum (strain ATCC 13032 / DSM 20300 / JCM 1318 / LMG 3730 / NCIMB 10025) GN=purL PE=3 SV=1//0 && PF02769:AIR synthase related protein, C-terminal domain|PF00586:AIR synthase related protein, N-terminal domain	-0.931391	8.3354e-08	1.05006	9.01089e-07
CGTRNA_RS12835	cg2868	nuc	2727300	2730050	2751	-//- && PF00932:Lamin Tail Domain|PF01391:Collagen triple helix repeat (20 copies)	1.59197	8.14474e-06	1.09602	0.0156415
CGTRNA_RS12850	cg2870	dctA	2731168	2732508	1341	sp|Q83PS4|DCTA_SHIFL C4-dicarboxylate transport protein OS=Shigella flexneri GN=dctA PE=3 SV=1//2.24484e-111 && PF00375:Sodium:dicarboxylate symporter family	1.07958	0.0327268	1.58652	0.00178875
CGTRNA_RS12865	cg2876	purB	2736810	2738249	1440	sp|Q8HXY5|PUR8_MACFA Adenylosuccinate lyase OS=Macaca fascicularis GN=ADSL PE=2 SV=1//2.86762e-73 && PF10397:Adenylosuccinate lyase C-terminus|PF00206:Lyase	-1.32372	6.17013e-15	-0.549959	0.0322227
CGTRNA_RS12880	cg2880	cg2880	2740895	2741305	411	sp|P49774|YHI1_MYCLE Uncharacterized HIT-like protein ML2237 OS=Mycobacterium leprae (strain TN) GN=ML2237 PE=3 SV=2//6.59e-46 && PF01230:HIT domain	-0.983069	6.58894e-07	-1.71308	5.75324e-09
CGTRNA_RS12910	cg2888	cgtR3	2747416	2748123	708	sp|O69730|TCRX_MYCTU Probable transcriptional regulatory protein TcrX OS=Mycobacterium tuberculosis (strain ATCC 25618 / H37Rv) GN=tcrX PE=1 SV=3//9.07557e-81 && PF00486:Transcriptional regulatory protein, C terminal|PF00072:Response regulator receiver domain	2.00133	9.82044e-23	-1.80079	1.41233e-12
CGTRNA_RS12945	cg2896	cg2896	2755646	2757790	2145	-//- && PF00722:Glycosyl hydrolases family 16	-2.377	6.46317e-24	0.869408	0.000566731
CGTRNA_RS12970	cg2902	cg2902	2761893	2762708	816	sp|Q45494|YKRA_BACSU Putative phosphatase YkrA OS=Bacillus subtilis (strain 168) GN=ykrA PE=3 SV=1//1.92315e-22 && PF08282:haloacid dehalogenase-like hydrolase	-0.706434	1.15642e-05	-0.619701	0.00495385
CGTRNA_RS12990	cg2905	thrE	2764291	2765760	1470	-//- && PF12821:Threonine/Serine exporter, ThrE|PF06738:Putative threonine/serine exporter	1.3637	1.58377e-08	1.55163	1.5636e-06
CGTRNA_RS13010	cg2909	otsB	2768179	2768949	771	sp|G4RK44|TPSP_THETK Bifunctional trehalose-6-phosphate synthase/phosphatase OS=Thermoproteus tenax (strain ATCC 35583 / NBRC 100435 / JCM 9277 / Kra 1) GN=tpsp PE=1 SV=1//2.89774e-17 && PF02358:Trehalose-phosphatase	0.405597	0.0221593	-0.500008	0.0442134
CGTRNA_RS13015	cg2910	cg2910	2768982	2770064	1083	sp|O87590|CELR_THEFU HTH-type transcriptional regulator CelR OS=Thermobifida fusca GN=celR PE=3 SV=1//2.95015e-22 && PF13377:Periplasmic binding protein-like domain	-1.99478	1.57778e-20	-1.56483	9.60766e-10
CGTRNA_RS13020	cg2911	cg2911	2770165	2771118	954	-//- && PF01297:Zinc-uptake complex component A periplasmic	2.50008	5.32389e-21	1.14992	0.00140628
CGTRNA_RS13070	cg2922	cg2922	2779905	2780561	657	-//- && PF01614:Bacterial transcriptional regulator	1.48995	1.09605e-06	1.05549	0.00251445
CGTRNA_RS13085	cg2925	ptsS	2783130	2785115	1986	sp|P43470|PTS3B_PEDPE PTS system sucrose-specific EIIBCA component OS=Pediococcus pentosaceus GN=scrA PE=3 SV=1//9.08997e-176 && PF02378:Phosphotransferase system, EIIC|PF00367:phosphotransferase system, EIIB|PF00358:phosphoenolpyruvate-dependent sugar phosphotransferase system, EIIA 1	-1.09023	0.0026681	-1.10524	2.1381e-07
CGTRNA_RS13095	cg2928	nagB	2786585	2787346	762	sp|Q8NMD4|NAGB_CORGL Glucosamine-6-phosphate deaminase OS=Corynebacterium glutamicum (strain ATCC 13032 / DSM 20300 / JCM 1318 / LMG 3730 / NCIMB 10025) GN=nagB PE=3 SV=1//7.34949e-156 && PF01182:Glucosamine-6-phosphate isomerases/6-phosphogluconolactonase	-1.34831	7.55019e-08	-1.41081	1.3276e-06
CGTRNA_RS13100	cg2929	nagA1	2787387	2788553	1167	sp|O34450|NAGA_BACSU N-acetylglucosamine-6-phosphate deacetylase OS=Bacillus subtilis (strain 168) GN=nagA PE=1 SV=1//6.57043e-36 && PF01979:Amidohydrolase family	-1.6089	1.93265e-07	-1.3408	9.83197e-05
CGTRNA_RS13105	cg2931	nanA	2788767	2789705	939	sp|B2RMB9|DAPA_PORG3 4-hydroxy-tetrahydrodipicolinate synthase OS=Porphyromonas gingivalis (strain ATCC 33277 / DSM 20709 / JCM 12257) GN=dapA PE=3 SV=1//1.74733e-38 && PF00701:Dihydrodipicolinate synthetase family	1.79409	0.00740516	1.54903	0.0300324
CGTRNA_RS13150	cg2941	cg2941	2799521	2800144	624	sp|A6T7N0|LEUE_KLEP7 Leucine efflux protein OS=Klebsiella pneumoniae subsp. pneumoniae (strain ATCC 700721 / MGH 78578) GN=leuE PE=3 SV=1//4.5431e-13 && PF01810:LysE type translocator	4.16735	1.67024e-05	2.81179	0.0229345
CGTRNA_RS13190	cg2949	cg2949	2805394	2805978	585	sp|Q8NMB4|Y2664_CORGL Uncharacterized protein Cgl2664/cg2949 OS=Corynebacterium glutamicum (strain ATCC 13032 / DSM 20300 / JCM 1318 / LMG 3730 / NCIMB 10025) GN=Cgl2664 PE=3 SV=1//1.09738e-121 && -	-1.00701	3.16073e-05	-1.39053	5.62504e-10
CGTRNA_RS13195	cg2950	radA	2806099	2807493	1395	sp|A0R563|RADA_MYCS2 DNA repair protein RadA homolog OS=Mycobacterium smegmatis (strain ATCC 700084 / mc(2)155) GN=radA PE=1 SV=1//2.77874e-144 && PF13541:Subunit ChlI of Mg-chelatase|PF13481:AAA domain	-0.525251	0.0300429	1.15778	7.82353e-05
CGTRNA_RS13210	cg2953	xylC	2809354	2810808	1455	sp|O06478|ALDH5_BACSU Putative aldehyde dehydrogenase YfmT OS=Bacillus subtilis (strain 168) GN=yfmT PE=2 SV=1//1.6331e-136 && PF00171:Aldehyde dehydrogenase family	-1.23047	1.20629e-11	-0.875518	0.000158052
CGTRNA_RS13215	cg2954	cynT	2811262	2811885	624	sp|P9WPJ9|MTCA2_MYCTU Carbonic anhydrase 2 OS=Mycobacterium tuberculosis (strain ATCC 25618 / H37Rv) GN=mtcA2 PE=1 SV=1//2.98377e-57 && PF00484:Carbonic anhydrase	-1.67135	1.92606e-17	-1.18768	7.05692e-07
CGTRNA_RS13235	cg2960	cg2960	2815802	2816545	744	-//- && -	0.647727	0.042017	-1.2865	0.00231493
CGTRNA_RS13240	cg2962	cg2962	2816737	2817030	294	sp|P9WKH3|MHUD_MYCTU Heme-degrading monooxygenase HmoB OS=Mycobacterium tuberculosis (strain ATCC 25618 / H37Rv) GN=mhuD PE=1 SV=1//5.22141e-22 && PF03992:Antibiotic biosynthesis monooxygenase	-2.46395	1.30326e-21	1.99832	2.02504e-13
CGTRNA_RS13245	cg2963	clpC	2817471	2820248	2778	sp|A0R574|CLPC1_MYCS2 ATP-dependent Clp protease ATP-binding subunit ClpC1 OS=Mycobacterium smegmatis (strain ATCC 700084 / mc(2)155) GN=clpC1 PE=3 SV=1//0 && PF10431:C-terminal, D2-small domain, of ClpB protein|PF00004:ATPase family associated with various cellular activities (AAA)|PF02861:Clp amino terminal domain, pathogenicity island component|PF07724:AAA domain (Cdc48 subfamily)|PF02151:UvrB…	1.8287	1.76413e-18	1.3664	1.09109e-09
CGTRNA_RS13250	cg2964	guaB1	2820537	2821970	1434	sp|P65173|Y1874_MYCBO Uncharacterized oxidoreductase Mb1874c OS=Mycobacterium bovis (strain ATCC BAA-935 / AF2122/97) GN=Mb1874c PE=3 SV=1//0 && PF00571:CBS domain|PF00478:IMP dehydrogenase / GMP reductase domain	1.87829	7.38333e-22	1.44371	6.94372e-07
CGTRNA_RS13270	cg2969	cg2969	2827077	2829020	1944	-//- && -	-1.16035	6.57104e-06	-1.17455	6.88451e-06
CGTRNA_RS13285	cg2973	cg2973	2832500	2833453	954	-//- && -	2.41574	0.000130589	2.67781	2.01414e-05
CGTRNA_RS13290	cg2974	lysS	2833810	2835390	1581	sp|A6W5H6|SYK_KINRD Lysine--tRNA ligase OS=Kineococcus radiotolerans (strain ATCC BAA-149 / DSM 14245 / SRS30216) GN=lysS PE=3 SV=1//0 && PF01336:OB-fold nucleic acid binding domain|PF00152:tRNA synthetases class II (D, K and N)	-0.448218	0.0205868	1.31141	1.60978e-09
CGTRNA_RS13310	cg2978	cg2978	2837689	2838156	468	-//- && PF11377:Protein of unknown function (DUF3180)	-0.806744	0.00667472	1.57136	6.77873e-09
CGTRNA_RS13315	cg2979	folK	2838172	2838651	480	sp|P71512|HPPK_METEA 2-amino-4-hydroxy-6-hydroxymethyldihydropteridine pyrophosphokinase OS=Methylobacterium extorquens (strain ATCC 14718 / DSM 1338 / AM1) GN=folK PE=3 SV=2//7.10598e-35 && PF01288:7,8-dihydro-6-hydroxymethylpterin-pyrophosphokinase (HPPK)	-1.2939	2.46475e-06	1.35901	1.82953e-07
CGTRNA_RS13320	cg2981	folX	2838651	2839043	393	sp|P9WNC5|FOLB_MYCTU Dihydroneopterin aldolase OS=Mycobacterium tuberculosis (strain ATCC 25618 / H37Rv) GN=folB PE=1 SV=1//2.86363e-40 && PF02152:Dihydroneopterin aldolase	-0.984146	0.000262623	1.09793	2.24085e-05
CGTRNA_RS13325	cg2982	folP1	2839036	2839890	855	sp|P9WND1|DHPS1_MYCTU Dihydropteroate synthase 1 OS=Mycobacterium tuberculosis (strain ATCC 25618 / H37Rv) GN=folP1 PE=1 SV=1//6.58876e-64 && PF00809:Pterin binding enzyme	-1.41168	7.28198e-11	1.1613	7.05964e-07
CGTRNA_RS13330	cg2983	folE	2839891	2840496	606	sp|Q8NM84|GCH1_CORGL GTP cyclohydrolase 1 OS=Corynebacterium glutamicum (strain ATCC 13032 / DSM 20300 / JCM 1318 / LMG 3730 / NCIMB 10025) GN=folE PE=3 SV=1//5.27229e-142 && PF01227:GTP cyclohydrolase I	-1.72767	5.78148e-14	0.694302	0.0034663
CGTRNA_RS13335	cg2984	ftsH	2840474	2843035	2562	sp|Q6M2F0|FTSH_CORGL ATP-dependent zinc metalloprotease FtsH OS=Corynebacterium glutamicum (strain ATCC 13032 / DSM 20300 / JCM 1318 / LMG 3730 / NCIMB 10025) GN=ftsH PE=3 SV=1//0 && PF01434:Peptidase family M41|PF00004:ATPase family associated with various cellular activities (AAA)	-1.00773	3.40661e-06	0.621611	0.0058411
CGTRNA_RS13340	cg2985	hpt	2843168	2843752	585	sp|P96794|HPRT_MYCAV Hypoxanthine-guanine phosphoribosyltransferase OS=Mycobacterium avium GN=hpt PE=3 SV=1//1.78399e-69 && PF00156:Phosphoribosyl transferase domain	-0.475546	0.0323953	-0.627339	0.0109305
CGTRNA_RS13400	cg3000	cg3000	2853273	2853563	291	sp|O32072|YTWF_BACSU Uncharacterized protein YtwF OS=Bacillus subtilis (strain 168) GN=ytwF PE=3 SV=2//3.40801e-12 && PF00581:Rhodanese-like domain	1.38982	7.52407e-08	-2.54062	7.23674e-11
CGTRNA_RS13410	cg3003	cps	2854306	2858193	3888	sp|O68008|BACC_BACLI Bacitracin synthase 3 OS=Bacillus licheniformis GN=bacC PE=3 SV=1//4.00088e-33 && PF00501:AMP-binding enzyme|PF00550:Phosphopantetheine attachment site	-1.18759	2.98676e-09	1.73301	1.65766e-10
CGTRNA_RS13430	cg3011	groEL	2862202	2863848	1647	sp|Q8NM64|CH602_CORGL 60 kDa chaperonin 2 OS=Corynebacterium glutamicum (strain ATCC 13032 / DSM 20300 / JCM 1318 / LMG 3730 / NCIMB 10025) GN=groL2 PE=3 SV=1//0 && PF00118:TCP-1/cpn60 chaperonin family	1.78283	2.12167e-10	2.75971	2.85776e-36
CGTRNA_RS13435	cg3012	cg3012	2864056	2864238	183	-//- && -	-1.6823	0.0167514	1.28244	0.00724865
CGTRNA_RS13440	cg3013	cg3013	2864235	2865446	1212	-//- && -	-1.39761	2.87901e-08	0.86258	0.00139631
CGTRNA_RS13445	cg3014	cg3014	2865443	2866408	966	-//- && -	-1.19298	6.5886e-07	0.608066	0.0254211
CGTRNA_RS13450	cg3015	cg3015	2866405	2868390	1986	-//- && -	-2.72878	8.05254e-30	0.863904	0.000385107
CGTRNA_RS13455	cg3016	cg3016	2868377	2870833	2457	-//- && -	-3.22216	3.76483e-49	0.915184	5.62467e-05
CGTRNA_RS13460	cg3017	cg3017	2870833	2873634	2802	-//- && -	-2.72941	9.8712e-31	0.903835	3.77305e-05
CGTRNA_RS13465	cg3018	cg3018	2873635	2877228	3594	-//- && PF13809:Tubulin like	-1.52967	1.11654e-16	0.789253	0.000406616
CGTRNA_RS13470	cg3019	cg3019	2877269	2879950	2682	-//- && -	-1.63847	1.66311e-16	0.663205	0.0082965
CGTRNA_RS13490	cg3024	mrpA	2883480	2886539	3060	sp|Q4L4W7|MNHA1_STAHJ Na(+)/H(+) antiporter subunit A1 OS=Staphylococcus haemolyticus (strain JCSC1435) GN=mnhA1 PE=3 SV=1//4.48055e-105 && PF13244:Domain of unknown function (DUF4040)|PF00361:Proton-conducting membrane transporter|PF04039:Domain related to MnhB subunit of Na+/H+ antiporter|PF00662:NADH-Ubiquinone oxidoreductase (complex I), chain 5 N-terminus	0.838271	7.42366e-05	1.70121	3.62489e-15
CGTRNA_RS13500	cg3026	mrpD	2887027	2888727	1701	sp|Q9RGZ2|MRPD_BACPE Na(+)/H(+) antiporter subunit D OS=Bacillus pseudofirmus (strain OF4) GN=mrpD PE=1 SV=2//2.40551e-83 && PF00361:Proton-conducting membrane transporter	-0.541338	0.020984	2.4475	1.38051e-27
CGTRNA_RS13515	cg3029	mrpG	2889513	2889893	381	sp|Q8CTM8|MNHG2_STAES Putative antiporter subunit mnhG2 OS=Staphylococcus epidermidis (strain ATCC 12228) GN=mnhG2 PE=3 SV=1//8.8344e-10 && PF03334:Na+/H+ antiporter subunit	-1.90709	0.00607257	2.18867	6.24195e-10
CGTRNA_RS13540	cg3034	def1	2893023	2893604	582	sp|Q8NM41|DEF2_CORGL Peptide deformylase 2 OS=Corynebacterium glutamicum (strain ATCC 13032 / DSM 20300 / JCM 1318 / LMG 3730 / NCIMB 10025) GN=def2 PE=3 SV=1//4.15384e-143 && PF01327:Polypeptide deformylase	-0.518073	0.0474652	-0.986606	0.00115582
CGTRNA_RS13555	cg3037	cls	2895426	2896928	1503	sp|Q8D2I8|CLSA_WIGBR Cardiolipin synthase A OS=Wigglesworthia glossinidia brevipalpis GN=clsA PE=3 SV=1//1.15085e-47 && PF13091:PLD-like domain|PF13396:Phospholipase_D-nuclease N-terminal	-0.64508	0.0278948	0.631039	0.0354641
CGTRNA_RS13570	cg3040	cg3040	2900012	2900854	843	sp|Q8NIL3|AES1_SCHPO Antisense-enhancing sequence 1 OS=Schizosaccharomyces pombe (strain 972 / ATCC 24843) GN=aes1 PE=3 SV=1//1.59936e-49 && PF02567:Phenazine biosynthesis-like protein	-1.32306	0.000198827	1.29377	1.86444e-07
CGTRNA_RS13595	cg3045	cg3045	2904648	2905682	1035	sp|P27676|GLNH_GEOSE Glutamine-binding protein OS=Geobacillus stearothermophilus GN=glnH PE=3 SV=1//3.19258e-41 && PF00497:Bacterial extracellular solute-binding proteins, family 3	-2.04292	1.49475e-15	0.727267	0.00954338
CGTRNA_RS13610	cg3048	pta	2909813	2911198	1386	sp|P77844|PTAS_CORGL Phosphate acetyltransferase OS=Corynebacterium glutamicum (strain ATCC 13032 / DSM 20300 / JCM 1318 / LMG 3730 / NCIMB 10025) GN=pta PE=2 SV=1//0 && PF01515:Phosphate acetyl/butaryl transferase	1.77364	0.038084	-4.48286	7.16697e-42
CGTRNA_RS13630	cg3052	cg3052	2914775	2915593	819	-//- && -	1.60669	1.55738e-07	1.63682	7.22205e-06
CGTRNA_RS13645	cg3057	cg3057	2918942	2919832	891	-//- && -	0.899084	3.87387e-06	-0.874524	0.00236755
CGTRNA_RS13650	cg3058	tnp8b(ISCg8a)	2920001	2921192	1192	sp|P35878|T904_LACLA Transposase for insertion sequence element IS904 OS=Lactococcus lactis subsp. lactis (strain IL1403) GN=nisX1 PE=3 SV=1//2.96123e-42 && PF01527:Transposase|PF00665:Integrase core domain|PF13276:HTH-like domain	2.43979	1.08694e-24	0.805317	0.020771
CGTRNA_RS13665	cg3061	cgtR6	2922568	2923188	621	sp|P9WGM5|NARL_MYCTU Probable transcriptional regulatory protein NarL OS=Mycobacterium tuberculosis (strain ATCC 25618 / H37Rv) GN=narL PE=1 SV=1//3.4983e-24 && PF00196:Bacterial regulatory proteins, luxR family|PF00072:Response regulator receiver domain	1.3464	2.1882e-09	-0.75157	0.0334032
CGTRNA_RS13675	cg3063	purA	2923737	2925029	1293	sp|Q8NM16|PURA_CORGL Adenylosuccinate synthetase OS=Corynebacterium glutamicum (strain ATCC 13032 / DSM 20300 / JCM 1318 / LMG 3730 / NCIMB 10025) GN=purA PE=3 SV=1//0 && PF00709:Adenylosuccinate synthetase	-0.961065	1.83823e-08	-0.627999	0.00623828
CGTRNA_RS13690	cg3067	cg3067	2926278	2927447	1170	sp|Q99340|Y2769_CORGL Uncharacterized protein Cgl2769/cg3067 OS=Corynebacterium glutamicum (strain ATCC 13032 / DSM 20300 / JCM 1318 / LMG 3730 / NCIMB 10025) GN=Cgl2769 PE=4 SV=2//0 && PF13515:Fusaric acid resistance protein-like	-0.730896	0.000221784	-1.07961	2.35645e-05
CGTRNA_RS13695	cg3068	fda	2927544	2928578	1035	sp|P19537|ALF_CORGL Fructose-bisphosphate aldolase OS=Corynebacterium glutamicum (strain ATCC 13032 / DSM 20300 / JCM 1318 / LMG 3730 / NCIMB 10025) GN=fba PE=1 SV=3//0 && PF01116:Fructose-bisphosphate aldolase class-II	-1.14294	1.26969e-13	-1.46116	2.1989e-12
CGTRNA_RS13735	cg3078	cg3078	2936501	2936902	402	-//- && PF14085:Domain of unknown function (DUF4265)	1.90612	5.62759e-21	0.74501	0.00979613
CGTRNA_RS13745	cg3080	cg3080	2939761	2941110	1350	-//- && -	2.633	1.16423e-08	1.68116	0.00416875
CGTRNA_RS13790	cg3090	cg3090	2947773	2948900	1128	-//- && PF09952:Transcriptional regulator, AbiEi antitoxin, Type IV TA system	-2.46683	3.0622e-20	-1.31569	9.99833e-06
CGTRNA_RS13795	cg3091	cg3091	2948860	2949669	810	-//- && -	-1.34639	1.77174e-06	-1.46057	3.14446e-05
CGTRNA_RS13805	cg3093	cg3093	2951150	2951950	801	sp|P9WJ01|Y480_MYCTU Hydrolase Rv0480c OS=Mycobacterium tuberculosis (strain ATCC 25618 / H37Rv) GN=Rv0480c PE=1 SV=1//3.69585e-69 && PF00795:Carbon-nitrogen hydrolase	-1.07213	4.03001e-08	-0.956612	9.7342e-05
CGTRNA_RS13815	cg3095	cg3095	2952288	2953424	1137	-//- && PF06259:Alpha/beta hydrolase	2.63004	1.0228e-19	1.36819	7.48281e-05
CGTRNA_RS13825	cg3097	hspR	2955326	2955766	441	sp|P40183|HSPR_STRCO Putative heat shock protein HspR OS=Streptomyces coelicolor (strain ATCC BAA-471 / A3(2) / M145) GN=hspR PE=2 SV=2//2.92258e-29 && PF13411:MerR HTH family regulatory protein	3.47433	2.3371e-70	1.89686	8.27148e-14
CGTRNA_RS13830	cg3098	dnaJ	2955798	2956985	1188	sp|Q8NLY8|DNAJ2_CORGL Chaperone protein DnaJ 2 OS=Corynebacterium glutamicum (strain ATCC 13032 / DSM 20300 / JCM 1318 / LMG 3730 / NCIMB 10025) GN=dnaJ2 PE=3 SV=1//0 && PF01556:DnaJ C terminal domain|PF00226:DnaJ domain|PF00684:DnaJ central domain	3.53181	3.89182e-101	2.03804	2.42845e-17
CGTRNA_RS13835	cg3099	grpE	2957190	2957846	657	sp|Q6M259|GRPE_CORGL Protein GrpE OS=Corynebacterium glutamicum (strain ATCC 13032 / DSM 20300 / JCM 1318 / LMG 3730 / NCIMB 10025) GN=grpE PE=3 SV=1//8.66909e-120 && PF01025:GrpE	2.45953	2.61e-41	1.99197	2.13791e-20
CGTRNA_RS13840	cg3100	dnaK	2957847	2959703	1857	sp|Q8NLY6|DNAK_CORGL Chaperone protein DnaK OS=Corynebacterium glutamicum (strain ATCC 13032 / DSM 20300 / JCM 1318 / LMG 3730 / NCIMB 10025) GN=dnaK PE=3 SV=1//0 && PF10712:NAD-specific glutamate dehydrogenase|PF00012:Hsp70 protein	3.04997	5.83011e-65	2.36299	1.22141e-28
CGTRNA_RS13845	cg3101	cg3101	2960043	2961473	1431	sp|P9WFM5|Y205_MYCTU UPF0118 membrane protein Rv0205 OS=Mycobacterium tuberculosis (strain ATCC 25618 / H37Rv) GN=Rv0205 PE=1 SV=1//1.85427e-29 && PF01594:AI-2E family transporter	1.39177	4.33473e-12	1.25537	7.8403e-07
CGTRNA_RS13870	cg3106	cg3106	2967224	2968711	1488	sp|A0QRY1|Y1279_MYCS2 Uncharacterized protein MSMEG_1279/MSMEI_1241 OS=Mycobacterium smegmatis (strain ATCC 700084 / mc(2)155) GN=MSMEG_1279 PE=2 SV=1//1.23653e-16 && PF11855:Protein of unknown function (DUF3375)	-1.64837	9.70576e-06	-1.03765	0.00270872
CGTRNA_RS13875	cg3107	adhA	2969050	2970087	1038	sp|P42327|ADH2_GEOSE Alcohol dehydrogenase OS=Geobacillus stearothermophilus GN=adh PE=1 SV=1//7.14514e-108 && PF00107:Zinc-binding dehydrogenase|PF08240:Alcohol dehydrogenase GroES-like domain	3.6124	0.00703088	-1.60267	7.09862e-05
CGTRNA_RS13895	cg3112	cg3112	2971831	2972760	930	sp|O34430|YTNM_BACSU UPF0721 transmembrane protein YtnM OS=Bacillus subtilis (strain 168) GN=ytnM PE=3 SV=1//7.24184e-33 && PF01925:Sulfite exporter TauE/SafE	1.33816	1.81099e-06	2.12905	1.42935e-13
CGTRNA_RS13900	cg3113	cg3113	2972781	2973506	726	sp|P61817|SIRB_BACME Sirohydrochlorin ferrochelatase OS=Bacillus megaterium GN=sirB PE=3 SV=1//5.66369e-17 && PF01903:CbiX	1.76502	5.91461e-14	2.21763	2.51513e-15
CGTRNA_RS13905	cg3114	cysN	2973544	2974845	1302	sp|P9WNM5|CYSNC_MYCTU Bifunctional enzyme CysN/CysC OS=Mycobacterium tuberculosis (strain ATCC 25618 / H37Rv) GN=cysNC PE=1 SV=1//3.02105e-120 && PF00009:Elongation factor Tu GTP binding domain	2.40867	2.69551e-25	2.39683	5.20611e-18
CGTRNA_RS13910	cg3115	cysD	2974845	2975759	915	sp|Q9X5U0|MMCV_STRLA Sulfate adenylyltransferase subunit 2 OS=Streptomyces lavendulae GN=mmcV PE=3 SV=1//4.4987e-138 && PF01507:Phosphoadenosine phosphosulfate reductase family	2.97972	1.53245e-42	2.42647	1.51326e-23
CGTRNA_RS13915	cg3116	cysH	2975756	2976541	786	sp|B1MN34|CYSH_MYCA9 Phosphoadenosine phosphosulfate reductase OS=Mycobacterium abscessus (strain ATCC 19977 / DSM 44196) GN=cysH PE=3 SV=1//2.21714e-68 && PF01507:Phosphoadenosine phosphosulfate reductase family	2.9345	1.61932e-39	1.66537	5.53979e-12
CGTRNA_RS13920	cg3118	cysI	2976783	2978468	1686	sp|Q73XV0|SIR2_MYCPA Sulfite reductase [ferredoxin] 2 OS=Mycobacterium paratuberculosis (strain ATCC BAA-968 / K-10) GN=sir2 PE=3 SV=1//0 && PF01077:Nitrite and sulphite reductase 4Fe-4S domain|PF03460:Nitrite/Sulfite reductase ferredoxin-like half domain	2.97291	1.73459e-46	0.761913	0.00146766
CGTRNA_RS13930	cg3120	cg3120	2980321	2981685	1365	sp|Q9BVA6|FICD_HUMAN Adenosine monophosphate-protein transferase FICD OS=Homo sapiens GN=FICD PE=1 SV=2//2.50211e-15 && PF02661:Fic/DOC family	-0.611599	0.0113512	-1.33965	2.09567e-08
CGTRNA_RS13950	cg3125	cg3125	2983013	2984545	1533	sp|P70795|YZ2R_AGRVI Uncharacterized 52.8 kDa protein in TAR-I ttuC&apos; 3&apos;region OS=Agrobacterium vitis PE=4 SV=2//2.62575e-99 && PF01970:Tripartite tricarboxylate transporter TctA family	1.64426	0.00446381	2.63023	1.77949e-07
CGTRNA_RS13955	cg3126	cg3126	2984545	2985111	567	-//- && PF07331:Tripartite tricarboxylate transporter TctB family	2.46259	0.0109262	3.15113	0.000243626
CGTRNA_RS13960	cg3127	cg3127	2985111	2986115	1005	sp|O34439|YFLP_BACSU UPF0065 protein YflP OS=Bacillus subtilis (strain 168) GN=yflP PE=3 SV=2//4.24079e-21 && PF03401:Tripartite tricarboxylate transporter family receptor	1.66418	5.36412e-05	1.2968	0.00515662
CGTRNA_RS13980	cg3131	cg3131	2989130	2990455	1326	sp|Q08BT9|P20D1_XENTR Probable carboxypeptidase PM20D1 OS=Xenopus tropicalis GN=pm20d1 PE=2 SV=1//1.963e-21 && PF01546:Peptidase family M20/M25/M40|PF07687:Peptidase dimerisation domain	2.52636	5.14132e-40	1.75067	6.29828e-13
CGTRNA_RS13985	cg3132	cg3132	2990790	2992529	1740	-//- && PF01292:Prokaryotic cytochrome b561	0.562281	0.00565255	1.16263	1.17113e-06
CGTRNA_RS14015	cg3138	cg3138	2997685	2998662	978	-//- && PF01145:SPFH domain / Band 7 family	-2.60443	5.10659e-50	-2.47112	3.00331e-28
CGTRNA_RS14020	cg3139	cg3139	2998667	2998861	195	-//- && -	-2.25064	2.59323e-14	-1.65846	9.68264e-09
CGTRNA_RS14025	cg3140	tagA1	2998858	2999448	591	sp|P05100|3MG1_ECOLI DNA-3-methyladenine glycosylase 1 OS=Escherichia coli (strain K12) GN=tag PE=1 SV=1//5.12492e-59 && PF03352:Methyladenine glycosylase	-2.18956	1.00654e-27	-1.65672	3.425e-11
CGTRNA_RS14065	cg3149	cg3149	3003975	3005288	1314	sp|P9WQ91|AAT_MYCTU Probable aspartate aminotransferase OS=Mycobacterium tuberculosis (strain ATCC 25618 / H37Rv) GN=aspC PE=1 SV=1//0 && PF00155:Aminotransferase class I and II	-0.752543	0.00117526	-0.696627	0.00572326
CGTRNA_RS14075	cg3153	cg3153	3007487	3008746	1260	-//- && PF07907:YibE/F-like protein	2.01666	2.67965e-14	2.059	7.41664e-13
CGTRNA_RS14120	cg3161	cg3161	3015990	3019097	3108	sp|P96419|AFTD_MYCTU Alpha-(1-&gt;3)-arabinofuranosyltransferase OS=Mycobacterium tuberculosis (strain ATCC 25618 / H37Rv) GN=aftD PE=1 SV=2//4.33089e-90 && PF11847:Domain of unknown function (DUF3367)	1.49203	2.71785e-09	1.71252	7.18833e-12
CGTRNA_RS14130	cg3163	cg3163	3019425	3020495	1071	-//- && PF01757:Acyltransferase family	2.24905	1.03874e-10	1.35504	0.00306718
CGTRNA_RS14140	cg3165	cg3165	3021364	3022788	1425	-//- && -	1.4268	1.61987e-07	1.29578	2.26824e-06
CGTRNA_RS14150	cg3167	cg3167	3023909	3024499	591	-//- && -	-1.04216	0.000168869	-0.745181	0.0448187
CGTRNA_RS14160	cg3169	pck	3025365	3027197	1833	sp|Q9AEM1|PCKG_CORGL Phosphoenolpyruvate carboxykinase [GTP] OS=Corynebacterium glutamicum (strain ATCC 13032 / DSM 20300 / JCM 1318 / LMG 3730 / NCIMB 10025) GN=pckG PE=1 SV=1//0 && PF17297:Phosphoenolpyruvate carboxykinase N-terminal domain|PF00821:Phosphoenolpyruvate carboxykinase C-terminal P-loop domain	-3.22118	2.43401e-38	-0.502974	0.0411559
CGTRNA_RS14180	cg3174	mmpL1	3030634	3032952	2319	sp|P9WJV5|MMPL3_MYCTU Trehalose monomycolate exporter MmpL3 OS=Mycobacterium tuberculosis (strain ATCC 25618 / H37Rv) GN=mmpL3 PE=1 SV=1//4.04029e-149 && PF03176:MMPL family	-0.875747	4.23136e-05	1.3666	1.90926e-08
CGTRNA_RS14185	cg3175	cg3175	3032957	3034042	1086	-//- && PF03706:Lysylphosphatidylglycerol synthase TM region	-1.32783	4.14468e-05	1.32245	4.08688e-05
CGTRNA_RS14200	cg3178	pks	3036254	3041086	4833	sp|P9WQE7|PPSA_MYCTU Phthiocerol synthesis polyketide synthase type I PpsA OS=Mycobacterium tuberculosis (strain ATCC 25618 / H37Rv) GN=ppsA PE=1 SV=1//0 && PF16197:Ketoacyl-synthetase C-terminal extension|PF00109:Beta-ketoacyl synthase, N-terminal domain|PF00698:Acyl transferase domain|PF00975:Thioesterase domain|PF00550:Phosphopantetheine attachment site|PF02801:Beta-ketoacyl synthase, C-termin…	-0.697209	0.000671995	1.30643	1.82778e-06
CGTRNA_RS14215	cg3181	cg3181	3044450	3044950	501	-//- && -	-0.463084	0.0193666	1.61559	1.59972e-13
CGTRNA_RS14235	cg3187	cg3187	3050018	3052078	2061	sp|Q8NLR0|AFTB_CORGL Terminal beta-(1-&gt;2)-arabinofuranosyltransferase OS=Corynebacterium glutamicum (strain ATCC 13032 / DSM 20300 / JCM 1318 / LMG 3730 / NCIMB 10025) GN=aftB PE=3 SV=1//0 && -	-0.545696	0.0224462	0.846522	0.000878218
CGTRNA_RS14280	cg3197	psp5	3061896	3063974	2079	sp|Q9V4X2|PGSC2_DROME Peptidoglycan-recognition protein SC2 OS=Drosophila melanogaster GN=PGRP-SC2 PE=2 SV=1//1.71032e-16 && PF01510:N-acetylmuramoyl-L-alanine amidase|PF08310:LGFP repeat	-0.484868	0.0102474	0.718348	0.00157497
CGTRNA_RS14285	cg3198	glpK	3064064	3065593	1530	sp|Q8NLP9|GLPK_CORGL Glycerol kinase OS=Corynebacterium glutamicum (strain ATCC 13032 / DSM 20300 / JCM 1318 / LMG 3730 / NCIMB 10025) GN=glpK PE=3 SV=1//0 && PF02782:FGGY family of carbohydrate kinases, C-terminal domain|PF00370:FGGY family of carbohydrate kinases, N-terminal domain	-1.8439	1.36658e-21	-0.490156	0.043437
CGTRNA_RS14300	cg3201	serS	3067382	3068650	1269	sp|Q8NLP6|SYS_CORGL Serine--tRNA ligase OS=Corynebacterium glutamicum (strain ATCC 13032 / DSM 20300 / JCM 1318 / LMG 3730 / NCIMB 10025) GN=serS PE=3 SV=1//0 && PF00587:tRNA synthetase class II core domain (G, H, P, S and T)|PF02403:Seryl-tRNA synthetase N-terminal domain	-1.27778	4.46059e-14	-0.625288	0.00612424
CGTRNA_RS14305	cg3202	cg3202	3068797	3069597	801	sp|Q82IW0|DASR_STRAW HTH-type transcriptional repressor DasR OS=Streptomyces avermitilis (strain ATCC 31267 / DSM 46492 / JCM 5070 / NCIMB 12804 / NRRL 8165 / MA-4680) GN=dasR PE=3 SV=1//4.35008e-33 && PF07702:UTRA domain|PF00392:Bacterial regulatory proteins, gntR family	-2.66263	2.99064e-34	-1.161	1.18463e-05
CGTRNA_RS14370	cg3214	cg3214	3079357	3080271	915	-//- && -	0.872997	7.649e-05	-0.889856	0.000735488
CGTRNA_RS14410	cg3224	cg3224	3089947	3090642	696	sp|P0ACL5|GLCC_ECOLI Glc operon transcriptional activator OS=Escherichia coli (strain K12) GN=glcC PE=1 SV=1//9.65192e-13 && PF07729:FCD domain|PF00392:Bacterial regulatory proteins, gntR family	-0.673268	0.00094138	-1.49011	8.46714e-09
CGTRNA_RS14415	cg3225	cg3225	3090643	3091431	789	-//- && PF00149:Calcineurin-like phosphoesterase	-1.21828	0.000261552	-1.57685	0.000129741
CGTRNA_RS14450	cg3232	cg3232	3095860	3097479	1620	-//- && PF00149:Calcineurin-like phosphoesterase|PF16656:Purple acid Phosphatase, N-terminal domain	1.793	0.000179182	1.29254	0.0126319
CGTRNA_RS14455	cg3233	cg3233	3097645	3098193	549	-//- && PF03803:Scramblase	0.932014	0.00108952	1.0911	0.000522868
CGTRNA_RS14605	cg3263	cg3263	3125720	3127138	1419	sp|P55589|Y4OD_RHISN Uncharacterized protein y4oD OS=Rhizobium sp. (strain NGR234) GN=NGR_a02250 PE=4 SV=1//7.28063e-09 && PF01936:NYN domain	0.603136	0.000442481	-0.725621	0.0020765
CGTRNA_RS14610	cg3264	cg3264	3127198	3128073	876	sp|P9WHP5|35KD_MYCTU 35 kDa protein OS=Mycobacterium tuberculosis (strain ATCC 25618 / H37Rv) GN=Rv2744c PE=1 SV=1//5.71427e-66 && PF04012:PspA/IM30 family	0.510562	0.00188066	-1.27564	1.89613e-07
CGTRNA_RS14660	cg3273	cg3273	3133541	3133837	297	-//- && PF07883:Cupin domain	1.34612	1.16848e-06	0.960822	0.00956549
CGTRNA_RS14710	cg3286	cg3286	3142075	3142650	576	-//- && -	-1.63707	4.38081e-06	-1.82157	8.34694e-08
CGTRNA_RS14715	cg3287	cg3287	3142721	3144202	1482	sp|I6WZK7|MMCO_MYCTU Multicopper oxidase MmcO OS=Mycobacterium tuberculosis (strain ATCC 25618 / H37Rv) GN=mmcO PE=1 SV=1//5.50704e-111 && PF07732:Multicopper oxidase|PF00394:Multicopper oxidase|PF07731:Multicopper oxidase	-1.88979	1.1526e-07	-1.08627	0.000753782
CGTRNA_RS14810	cg3312	cg3312	3158840	3160300	1461	-//- && PF09594:Glycosyltransferase family 87	0.966092	4.52633e-05	1.62803	3.61057e-09
CGTRNA_RS14815	cg3313	mrcB	3160346	3162508	2163	sp|A0R7G2|PBP1A_MYCS2 Penicillin-binding protein 1A OS=Mycobacterium smegmatis (strain ATCC 700084 / mc(2)155) GN=ponA1 PE=3 SV=1//0 && PF00905:Penicillin binding protein transpeptidase domain|PF00912:Transglycosylase	0.437963	0.0135648	1.02146	2.21731e-05
CGTRNA_RS14825	cg3315	cg3315	3163184	3163657	474	sp|O32181|YUSO_BACSU Uncharacterized HTH-type transcriptional regulator YusO OS=Bacillus subtilis (strain 168) GN=yusO PE=1 SV=1//1.01022e-08 && PF01047:MarR family	-1.25875	7.48921e-08	-1.65791	4.43207e-09
CGTRNA_RS14830	cg3316	cg3316	3163688	3164629	942	sp|P64996|Y2346_MYCBO Universal stress protein Mb2346c OS=Mycobacterium bovis (strain ATCC BAA-935 / AF2122/97) GN=Mb2346c PE=3 SV=1//1.26327e-30 && PF00582:Universal stress protein family	-0.927348	7.908e-06	-1.01862	4.03925e-05
CGTRNA_RS14835	cg3317	cg3317	3164661	3165158	498	-//- && -	-1.63423	2.93404e-16	-0.683139	0.00355617
CGTRNA_RS14845	cg3319	cg3319	3165570	3166508	939	sp|Q8NLF0|Y2992_CORGL UPF0176 protein Cgl2992/cg3319 OS=Corynebacterium glutamicum (strain ATCC 13032 / DSM 20300 / JCM 1318 / LMG 3730 / NCIMB 10025) GN=Cgl2992 PE=3 SV=1//0 && PF12368:Rhodanase C-terminal	-1.06035	3.36769e-07	0.538836	0.0195776
CGTRNA_RS14855	cg3321	cg3321	3167818	3168510	693	sp|O31711|YKNY_BACSU Uncharacterized ABC transporter ATP-binding protein YknY OS=Bacillus subtilis (strain 168) GN=yknY PE=1 SV=1//1.86728e-79 && PF00005:ABC transporter	1.01446	0.0414587	1.92975	5.57304e-06
CGTRNA_RS14880	cg3327	dps	3174564	3175061	498	sp|P0C558|DPS_MYCSM DNA protection during starvation protein OS=Mycobacterium smegmatis GN=dps PE=1 SV=1//1.67134e-60 && PF00210:Ferritin-like domain	1.33726	1.1512e-14	-0.674091	0.00586034
CGTRNA_RS14890	cg3329	cg3329	3176259	3177410	1152	sp|P46850|RTCB_ECOLI RNA-splicing ligase RtcB OS=Escherichia coli (strain K12) GN=rtcB PE=1 SV=3//1.80508e-111 && PF01139:tRNA-splicing ligase RtcB	4.6013	9.599e-32	3.74174	3.05411e-35
CGTRNA_RS14895	cg3330	cg3330	3177472	3178038	567	-//- && PF02698:DUF218 domain	2.83812	6.98061e-22	2.12053	2.01285e-13
CGTRNA_RS14915	cg3335	mez	3181586	3182764	1179	sp|P16468|MAOX_GEOSE NAD-dependent malic enzyme OS=Geobacillus stearothermophilus PE=1 SV=1//1.12908e-121 && PF00390:Malic enzyme, N-terminal domain|PF03949:Malic enzyme, NAD binding domain	0.904306	0.0494907	2.23893	5.81386e-06
CGTRNA_RS14940	cg3340	dadA	3187239	3188471	1233	sp|Q88CB1|DADA2_PSEPK D-amino acid dehydrogenase 2 OS=Pseudomonas putida (strain KT2440) GN=dadA2 PE=3 SV=1//7.65141e-36 && PF01266:FAD dependent oxidoreductase	1.3085	1.11154e-09	1.21585	2.50751e-06
CGTRNA_RS14955	cg3343	cg3343	3190762	3191085	324	-//- && -	-1.34349	1.25206e-12	-1.33001	2.36407e-10
CGTRNA_RS14985	cg3349	cg3349	3197297	3198022	726	-//- && PF11716:Mycothiol maleylpyruvate isomerase N-terminal domain	1.13589	1.17866e-06	1.09428	8.19362e-05
CGTRNA_RS15045	cg3362	trpCF	3209949	3211373	1425	sp|P06560|TRPC_CORGL Tryptophan biosynthesis protein TrpCF OS=Corynebacterium glutamicum (strain ATCC 13032 / DSM 20300 / JCM 1318 / LMG 3730 / NCIMB 10025) GN=trpC PE=3 SV=2//0 && PF00697:N-(5'phosphoribosyl)anthranilate (PRA) isomerase|PF00218:Indole-3-glycerol phosphate synthase	-0.666548	0.0200944	2.33779	1.41349e-18
CGTRNA_RS15055	cg3364	trpA	3212640	3213482	843	sp|P06562|TRPA_CORGL Tryptophan synthase alpha chain OS=Corynebacterium glutamicum (strain ATCC 13032 / DSM 20300 / JCM 1318 / LMG 3730 / NCIMB 10025) GN=trpA PE=3 SV=2//7.02731e-169 && PF00290:Tryptophan synthase alpha chain	-0.823251	0.0104874	2.35018	1.18371e-16
CGTRNA_RS15060	cg3365	rmpC	3213618	3215159	1542	sp|Q328K4|ULAA_SHIDS Ascorbate-specific permease IIC component UlaA OS=Shigella dysenteriae serotype 1 (strain Sd197) GN=ulaA PE=3 SV=2//2.85778e-30 && PF03611:PTS system sugar-specific permease component	-1.45839	2.96316e-14	1.23083	2.0318e-07
CGTRNA_RS15065	cg3366	rmpA	3215184	3215996	813	sp|Q8FAJ0|ULAC_ECOL6 Ascorbate-specific phosphotransferase enzyme IIA component OS=Escherichia coli O6:H1 (strain CFT073 / ATCC 700928 / UPEC) GN=ulaC PE=3 SV=1//1.53411e-16 && PF02302:PTS system, Lactose/Cellobiose specific IIB subunit|PF00359:Phosphoenolpyruvate-dependent sugar phosphotransferase system, EIIA 2	-1.81481	8.2393e-15	-0.599949	0.0260014
CGTRNA_RS15080	cg3369	qcrA2	3218727	3219077	351	-//- && PF00355:Rieske [2Fe-2S] domain	-0.805243	0.00040347	-0.96696	0.00208502
CGTRNA_RS15090	cg3371	cg3371	3220542	3221516	975	sp|P39879|Y2026_PSEAE Uncharacterized protein PA2026 OS=Pseudomonas aeruginosa (strain ATCC 15692 / PAO1 / 1C / PRS 101 / LMG 12228) GN=PA2026 PE=4 SV=2//2.64195e-81 && PF13593:SBF-like CPA transporter family (DUF4137)	-0.801273	0.00143653	-1.43211	4.0978e-05
CGTRNA_RS15100	cg3373	cg3373	3222492	3222830	339	sp|O31480|YCZG_BACSU Uncharacterized HTH-type transcriptional regulator YczG OS=Bacillus subtilis (strain 168) GN=yczG PE=3 SV=1//1.30323e-19 && PF12840:Helix-turn-helix domain	0.965272	0.00662591	-1.047	0.0180954
CGTRNA_RS15110	cg3375	cg3375	3224066	3224716	651	sp|O07609|YHFK_BACSU Uncharacterized sugar epimerase YhfK OS=Bacillus subtilis (strain 168) GN=yhfK PE=2 SV=1//1.86845e-35 && PF13460:NAD(P)H-binding	2.81064	1.34514e-22	0.974581	0.0125224
CGTRNA_RS15135	cg3381	cg3381	3226868	3227050	183	sp|A4QI94|TATA_CORGB Sec-independent protein translocase protein TatA OS=Corynebacterium glutamicum (strain R) GN=tatA PE=3 SV=1//6.00597e-29 && PF02416:mttA/Hcf106 family	-1.39796	0.000161168	-2.07786	9.35983e-09
CGTRNA_RS15140	cg3382	cg3382	3227129	3228655	1527	sp|P94408|YCLF_BACSU Uncharacterized transporter YclF OS=Bacillus subtilis (strain 168) GN=yclF PE=3 SV=2//1.06646e-77 && PF00854:POT family	-0.850115	0.00013663	-0.789742	0.00306718
CGTRNA_RS15150	cg3385	catA3	3229776	3230681	906	sp|Q6F4M7|NPCC_RHOOP Hydroxyquinol 1,2-dioxygenase OS=Rhodococcus opacus GN=npcC PE=2 SV=1//5.07336e-149 && PF00775:Dioxygenase|PF04444:Catechol dioxygenase N terminus	1.93774	1.62243e-07	0.940004	0.0365814
CGTRNA_RS15190	cg3393	cg3393	3240019	3244404	4386	sp|O34986|YVNB_BACSU Uncharacterized protein YvnB OS=Bacillus subtilis (strain 168) GN=yvnB PE=3 SV=1//0 && PF00149:Calcineurin-like phosphoesterase|PF00932:Lamin Tail Domain	2.85559	7.46848e-19	1.24681	0.0065106
CGTRNA_RS15195	cg3394	cg3394	3244772	3245788	1017	-//- && -	3.49074	0.00113044	3.78526	0.000230111
CGTRNA_RS15200	cg3395	proP	3245868	3247382	1515	sp|P40862|PROP_SALTY Proline/betaine transporter OS=Salmonella typhimurium (strain LT2 / SGSC1412 / ATCC 700720) GN=proP PE=3 SV=2//3.58212e-100 && PF00083:Sugar (and other) transporter	4.69933	8.42071e-109	2.05402	9.99445e-20
CGTRNA_RS15205	cg3396	cg3396	3247793	3248539	747	sp|Q21190|UNC1_CAEEL Protein unc-1 OS=Caenorhabditis elegans GN=unc-1 PE=3 SV=2//2.49003e-08 && PF01145:SPFH domain / Band 7 family	2.93455	1.13001e-57	1.35118	4.39491e-08
CGTRNA_RS15260	cg3409	thiD2	3260698	3261498	801	sp|P39610|PDXK_BACSU Pyridoxine kinase OS=Bacillus subtilis (strain 168) GN=pdxK PE=1 SV=1//2.77078e-68 && PF08543:Phosphomethylpyrimidine kinase	-1.11515	4.24648e-09	-0.805586	0.00111147
CGTRNA_RS15300	cg3418	cg3418	3266805	3269318	2514	-//- && -	-1.10933	2.04109e-07	1.03253	1.1547e-05
CGTRNA_RS15305	cg3419	cg3419	3269371	3272715	3345	sp|P9WJK3|MVIN_MYCTU Probable peptidoglycan biosynthesis protein MviN OS=Mycobacterium tuberculosis (strain ATCC 25618 / H37Rv) GN=mviN PE=1 SV=1//5.24654e-20 && PF03023:MviN-like protein	-1.25277	8.47482e-09	1.8977	2.37309e-17
CGTRNA_RS15320	cg3423	trxC	3274717	3275040	324	sp|P0A4L2|THIO1_NOSSO Thioredoxin-1 OS=Nostoc sp. (strain ATCC 29151 / PCC 7119) GN=trxA PE=1 SV=2//3.09343e-29 && PF00085:Thioredoxin	0.671221	0.000652931	0.562999	0.0212908
CGTRNA_RS15325	cg3424	cwlM	3275117	3276307	1191	sp|Q5HNS0|LYTH_STAEQ Probable cell wall amidase LytH OS=Staphylococcus epidermidis (strain ATCC 35984 / RP62A) GN=lytH PE=3 SV=1//4.78817e-15 && PF01471:Putative peptidoglycan binding domain|PF01520:N-acetylmuramoyl-L-alanine amidase	1.0023	2.2958e-10	1.06312	1.33972e-06
CGTRNA_RS15330	cg3425	cg3425	3276304	3276924	621	-//- && -	0.655673	0.0045832	1.86764	1.88508e-12
CGTRNA_RS15340	cg3427	parA1	3278140	3279063	924	sp|P37522|SOJ_BACSU Sporulation initiation inhibitor protein Soj OS=Bacillus subtilis (strain 168) GN=soj PE=1 SV=1//4.68211e-91 && PF13614:AAA domain	0.422753	0.0284957	1.244	5.83741e-07
CGTRNA_RS15485	M1_RNA	M1_RNA	2342591	2342998	408	-//- && -	-2.01448	1.27998e-11	0.997671	0.000409493
CGTRNA_RS15510	cg0494	cg0494	436462	436563	102	-//- && PF08213:Mitochondrial domain of unknown function (DUF1713)	-1.23654	5.08937e-10	-0.613772	0.0116376
CGTRNA_RS15770	-	-	2918479	2918928	450	-//- && -	0.79589	0.000141899	-0.913527	0.00189589
CGTRNA_RS15920	cg2300	hisH	2182669	2183304	636	sp|O69043|HIS5_CORGL Imidazole glycerol phosphate synthase subunit HisH OS=Corynebacterium glutamicum (strain ATCC 13032 / DSM 20300 / JCM 1318 / LMG 3730 / NCIMB 10025) GN=hisH PE=3 SV=2//9.81448e-159 && PF00117:Glutamine amidotransferase class-I	-1.56019	7.74602e-11	-0.622446	0.0157333
CGTRNA_RS16075	cg1514	cg1514	1406784	1406999	216	-//- && -	-2.11443	1.27084e-23	-2.48541	1.55292e-28
CGTRNA_RS16085	cg1670	cg1670	1557302	1557640	339	-//- && -	0.475399	0.0315208	-1.12015	0.000101892
CGTRNA_RS16095	cg2215	cg2215	2105694	2106194	501	sp|O69726|Y3760_MYCTU Uncharacterized membrane protein Rv3760 OS=Mycobacterium tuberculosis (strain ATCC 25618 / H37Rv) GN=Rv3760 PE=1 SV=4//4.31816e-06 && PF06305:Lipopolysaccharide assembly protein A domain	1.905	3.86782e-21	-1.50739	2.86278e-07
CGTRNA_RS16105	-	-	3146214	3146375	162	-//- && -	5.20947	0.0031788	4.17004	0.0382164
CGTRNA_RS16150	cg2430	cg2430	2322077	2322244	168	-//- && -	2.61906	5.48655e-26	-3.06323	2.52388e-07
CGTRNA_RS16165	cg2667	cg2667	2543869	2544027	159	-//- && -	-1.24126	0.0183042	-2.24453	0.000281038
CGTRNA_RS16235	cg0323	cg0323	280946	281401	456	-//- && PF01899:Na+/H+ ion antiporter subunit	-1.76348	0.0105112	2.13162	1.74928e-06
